# Supplementary material
Source: MDPI journal article supplement (https://www.mdpi.com/2673-8236/4/1/5)

## Supplementary materials

**Supplementary Table S1.** Grey literature search strategy (number of materials retrieved)

| Journal Homepages                                                | Professional Societies/Associations                                     |
|------------------------------------------------------------------|-------------------------------------------------------------------------|
| <i>Nephrology</i>                                                |                                                                         |
| Nature Reviews Nephrology (7)                                    | Australian and New Zealand Society of Nephrology (0)                    |
| Journal of the American Society of Nephrology (4)                | Renal Society of Australasia (0)                                        |
| Kidney International (7)                                         | United Kingdom Kidney Association (0)                                   |
| American Journal of Kidney Diseases (20)                         | European Renal Association (0)                                          |
| Clinical Journal of the American Society of Nephrology (9)       | American Society of Nephrology (0)                                      |
| Nephrology Dialysis Transplantation (30)                         | Canadian Society of Nephrology (0)                                      |
| Kidney International Supplements (0)                             | Japanese Society of Nephrology (0)                                      |
| Brain, Behaviour, and Immunity – Health (0)                      | Korean Society of Nephrology (0)                                        |
| Kidney International Reports (9)                                 | South African Nephrology Society (0)                                    |
| American Journal of Nephrology (4)                               | International Society of Nephrology (1)                                 |
| CKJ: Clinical Kidney Journal (3)                                 |                                                                         |
| Minerva Urology and Nephrology (0)                               |                                                                         |
| Advances in Chronic Kidney Disease (10)                          |                                                                         |
| Kidney Medicine (0)                                              |                                                                         |
| Seminars in Nephrology (2)                                       |                                                                         |
| Current Opinion in Nephrology and Hypertension (1)               |                                                                         |
| Journal of Nephrology (6)                                        |                                                                         |
| Blood Purification (3)                                           |                                                                         |
| Kidney Research and Clinical Practice (0)                        |                                                                         |
| Peritoneal Dialysis International (8)                            |                                                                         |
| Pediatric Nephrology (0)                                         |                                                                         |
| BMC Nephrology (7)                                               |                                                                         |
| Canadian Journal of Kidney Health and Disease (0)                |                                                                         |
| Current Transplantation Reports (0)                              |                                                                         |
| Journal of Renal Nutrition (8)                                   |                                                                         |
| Kidney and Blood Pressure Research (1)                           |                                                                         |
| Nephrology (4)                                                   |                                                                         |
| Renal Failure (11)                                               |                                                                         |
| Seminars in Dialysis (9)                                         |                                                                         |
| International Urology and Nephrology (2)                         |                                                                         |
| Scandinavian Journal of Urology (0)                              |                                                                         |
| Therapeutic Apheresis and Dialysis (0)                           |                                                                         |
| International Journal of Nephrology and Renovascular Disease (0) |                                                                         |
| <i>Obstetrics and Gynecology</i>                                 |                                                                         |
| Human Reproduction Update (0)                                    | National Association of Specialist Obstetricians and Gynaecologists (0) |

| Journal Homepages                                                     | Professional Societies/Associations                                          |
|-----------------------------------------------------------------------|------------------------------------------------------------------------------|
| American Journal of Obstetrics and Gynecology (4)                     | Society of Obstetric Medicine of Australia and New Zealand (0)               |
| Ultrasound in Obstetrics and Gynecology (11)                          | MacDonald Obstetric Medicine Society (the UK obstetric medicine society) (0) |
| Obstetrics and Gynecology (4)                                         | European Society of Gynecology (0)                                           |
| BJOG: An International Journal of Obstetrics and Gynaecology (0)      | American Gynecological & Obstetrical Society (0)                             |
| Archives of Disease in Childhood: Fetal and Neonatal Edition (0)      | Society of Obstetricians and Gynaecologists of Canada (0)                    |
| <i>Obstetrics and Gynecology</i>                                      |                                                                              |
| An International Reproductive Health Journal: Contraception (0)       | Japan Society of Obstetrics and Gynaecology (0)                              |
| Human Reproduction (0)                                                | Korean Society of Obstetrics and Gynaecology (0)                             |
| Perspectives on Sexual and Reproductive Health (0)                    | The South African Society of Obstetricians and Gynaecologists (0)            |
| American Journal of Obstetrics and Gynecology MFM (0)                 |                                                                              |
| Gynecologic Oncology (0)                                              |                                                                              |
| LGBT Health (0)                                                       |                                                                              |
| Fertility and Sterility (0)                                           |                                                                              |
| Contraception: X (0)                                                  |                                                                              |
| Archives of Women's Mental Health (0)                                 |                                                                              |
| Acta Obstetrica et Gynecologica Scandinavica (1)                      |                                                                              |
| Best Practice and Research in Clinical Obstetrics and Gynaecology (4) |                                                                              |
| International Journal of Gynecological Cancer (0)                     |                                                                              |
| Women's Health Issues (0)                                             |                                                                              |
| Maternal and Child Nutrition (0)                                      |                                                                              |
| Reproductive Health (0)                                               |                                                                              |
| BMC Pregnancy and Childbirth (0)                                      |                                                                              |
| Women and Birth (0)                                                   |                                                                              |
| International Breastfeeding Journal (0)                               |                                                                              |
| Journal of Perinatology (0)                                           |                                                                              |
| Journal of Ovarian Research (0)                                       |                                                                              |
| Sexual and Reproductive Health Matters (0)                            |                                                                              |
| International Journal of Neonatal Screening (0)                       |                                                                              |
| International Journal of Gynecology and Obstetrics (3)                |                                                                              |
| Journal of Gynecologic Oncology (0)                                   |                                                                              |
| Seminars in Perinatology (0)                                          |                                                                              |
| International Journal of Gynecological Pathology (0)                  |                                                                              |
| Midwifery (0)                                                         |                                                                              |
| Birth (0)                                                             |                                                                              |
| BMJ Sexual and Reproductive Health (0)                                |                                                                              |

| Journal Homepages                                                             | Professional Societies/Associations |
|-------------------------------------------------------------------------------|-------------------------------------|
| Breastfeeding Medicine (0)                                                    |                                     |
| Journal of Reproductive and Infant Psychology (0)                             |                                     |
| Menopause (0)                                                                 |                                     |
| Obstetrics and Gynecology Clinics of North America (4)                        |                                     |
| Journal of Psychosomatic Obstetrics and Gynaecology (0)                       |                                     |
| Pregnancy Hypertension (0)                                                    |                                     |
| Journal of Human Lactation (0)                                                |                                     |
| Journal of Pregnancy (0)                                                      |                                     |
| American Journal of Reproductive Immunology (0)                               |                                     |
| Journal of Midwifery and Women's Health (0)                                   |                                     |
| Journal of Reproductive Immunology (0)                                        |                                     |
| Prenatal Diagnosis (0)                                                        |                                     |
| Maternal and Child Health Journal (0)                                         |                                     |
| International Journal of Obstetric Anesthesia (1)                             |                                     |
| BMC Women's Health (0)                                                        |                                     |
| Journal of Minimally Invasive Gynecology (0)                                  |                                     |
| <i>Obstetrics and Gynecology</i>                                              |                                     |
| Climacteric (0)                                                               |                                     |
| European Journal of Obstetrics, Gynecology and Reproductive Biology (3)       |                                     |
| International Urogynecology Journal (0)                                       |                                     |
| Journal of Lower Genital Tract Disease (0)                                    |                                     |
| American Journal of Perinatology (0)                                          |                                     |
| Archives of Gynecology and Obstetrics (1)                                     |                                     |
| European Journal of Obstetrics and Gynecology and Reproductive Biology: X (0) |                                     |
| Clinics in Perinatology (2)                                                   |                                     |
| Early Human Development (0)                                                   |                                     |
| Journal of Pediatric and Adolescent Gynecology (0)                            |                                     |
| International Journal of Women's Health (1)                                   |                                     |
| Australian and New Zealand Journal of Obstetrics and Gynaecology (1)          |                                     |
| Fetal Diagnosis and Therapy (1)                                               |                                     |
| Journal of Perinatal Medicine (1)                                             |                                     |
| Journal of Maternal-Fetal and Neonatal Medicine (1)                           |                                     |
| Reproductive Sciences (0)                                                     |                                     |
| Female Pelvic Medicine and Reconstructive Surgery (0)                         |                                     |
| F and S Reports (0)                                                           |                                     |
| European Journal of Contraception and Reproductive Healthcare (0)             |                                     |
| Sexual and Reproductive Healthcare (0)                                        |                                     |

| <b>Journal Homepages</b>                                    | <b>Professional Societies/Associations</b>                 |
|-------------------------------------------------------------|------------------------------------------------------------|
| Current Opinion in Obstetrics and Gynecology (1)            |                                                            |
| Gynecologic and Obstetric Investigation (0)                 |                                                            |
| F and S Reviews (0)                                         |                                                            |
| Journal of Obstetrics and Gynaecology Canada (1)            |                                                            |
| Obstetrics and Gynecology Science (0)                       |                                                            |
| International Journal of Fertility and Sterility (0)        |                                                            |
| Journal of Gynecology Obstetrics and Human Reproduction (0) |                                                            |
| Clinical Obstetrics and Gynecology (0)                      |                                                            |
| Journal of Obstetrics and Gynaecology Research (0)          |                                                            |
| Obstetrical and Gynecological Survey (2)                    |                                                            |
| Advances in Urology (0)                                     |                                                            |
| Taiwanese Journal of Obstetrics and Gynecology (0)          |                                                            |
| Post Reproductive Health (0)                                |                                                            |
| Hypertension in Pregnancy (0)                               |                                                            |
| Obstetrics and Gynecology International (0)                 |                                                            |
| Infectious Diseases in Obstetrics and Gynecology (0)        |                                                            |
| Minerva Obstetrics and Gynecology (0)                       |                                                            |
| <b><i>Nutrition and Dietetics</i></b>                       |                                                            |
| Annual Review of Nutrition (0)                              | Dietitians Australia (0)                                   |
| Advances in Nutrition (0)                                   | Nutrition Society of Australia (0)                         |
| American Journal of Clinical Nutrition (0)                  | Nutrition Society of New Zealand (0)                       |
| Clinical Nutrition (1)                                      | Dietitians New Zealand (0)                                 |
| Nutrition Reviews (0)                                       | British Dietetic Association (0)                           |
| International Journal of Obesity (0)                        | The Nutrition Society (United Kingdom) (0)                 |
| <b><i>Nutrition and Dietetics</i></b>                       |                                                            |
| Nutrients (1)                                               | European Society for Clinical Nutrition and Metabolism (0) |
| Journal of Nutrition, Health and Aging (0)                  | American Society for Nutrition (0)                         |
| Journal of Clinical Lipidology (0)                          | Canadian Nutrition Society (0)                             |
| Nutrition Research Reviews (0)                              | Dietitians of Canada (0)                                   |
| Pediatric Obesity (0)                                       | The Japan Dietetic Association (0)                         |
| Appetite (0)                                                | Japan Society of Nutrition and Food Science (0)            |
| Journal of the Academy of Nutrition and Dietetics (1)       | The Korean Dietetic Association (0)                        |
| Food Quality and Preference (0)                             | The Korean Nutrition Society (0)                           |
| Nutrition Journal (0)                                       | Association for Dietetics in South Africa (0)              |
| Obesity Surgery (0)                                         | The Nutrition Society of South Africa (0)                  |
| Journal of Nutrition (0)                                    |                                                            |
| BMJ Nutrition, Prevention and Health (0)                    |                                                            |
| European Journal of Nutrition (0)                           |                                                            |
| Maternal and Childhood Nutrition (0)                        |                                                            |
| European Journal of Clinical Nutrition (1)                  |                                                            |
| Nutrition, Metabolism and Cardiovascular Diseases (0)       |                                                            |

| <b>Journal Homepages</b>                                     | <b>Professional Societies/Associations</b> |
|--------------------------------------------------------------|--------------------------------------------|
| Current Nutrition Reports (0)                                |                                            |
| Nutrition (0)                                                |                                            |
| Nutrition and Metabolism (0)                                 |                                            |
| Journal of Parenteral and Enteral Nutrition (0)              |                                            |
| Obesity Research and Clinical Practice (0)                   |                                            |
| British Journal of Nutrition (0)                             |                                            |
| Journal of Functional Foods (0)                              |                                            |
| Current Developments in Nutrition (0)                        |                                            |
| Nutritional Neuroscience (0)                                 |                                            |
| Proceedings of the Nutrition Society (0)                     |                                            |
| Public Health Nutrition (0)                                  |                                            |
| Annals of Nutrition and Metabolism (0)                       |                                            |
| Journal of Eating Disorders (0)                              |                                            |
| Nutrition in Clinical Practice (0)                           |                                            |
| Journal of Human Nutrition and Dietetics (0)                 |                                            |
| NFS Journal (0)                                              |                                            |
| Current Opinion in Clinical Nutrition and Metabolic Care (0) |                                            |
| Childhood Obesity (0)                                        |                                            |
| Obesity Science and Practice (0)                             |                                            |
| Primary Care Diabetes (0)                                    |                                            |
| Food Production, Processing and Nutrition (0)                |                                            |
| Journal of Nutrition Education and Behaviour (0)             |                                            |
| Clinical Nutrition ESPEN (0)                                 |                                            |
| Journal of Renal Nutrition (6)                               |                                            |
| Nutrition and Dietetics (0)                                  |                                            |
| Journal of Nutritional Science (0)                           |                                            |
| Nutrition Bulletin (0)                                       |                                            |
| Journal of Nutrition and Metabolism (0)                      |                                            |
| Journal of Future Foods (0)                                  |                                            |
| Food and Nutrition Research (0)                              |                                            |
| Journal of the American College of Nutrition (0)             |                                            |
| Food and Nutrition Bulletin (0)                              |                                            |

**Supplementary Table S2.** Scoping review eligibility criteria.

| <b>Inclusion Criteria</b>                                                                                                                                         | <b>Exclusion Criteria</b>                                                                                                      |
|-------------------------------------------------------------------------------------------------------------------------------------------------------------------|--------------------------------------------------------------------------------------------------------------------------------|
| Case reports, case series, reviews, observational studies, editorials, conference abstracts, consensus guidelines, position papers, and book chapters             | Non-human studies                                                                                                              |
|                                                                                                                                                                   | Documents without full text availability                                                                                       |
|                                                                                                                                                                   | Documents about non-pregnant and/or non-dialysing patients                                                                     |
| Sources of evidence must include nutritional, supplement, breast-feeding, dietary pattern, and/or weight recommendations for pregnant patients receiving dialysis | Sources of evidence that do not include nutritional, supplement, breastfeeding, dietary pattern, and/or weight recommendations |
| Database searches: English and translatable non-English studies                                                                                                   | 'Biology', 'Molecular', and 'Exercise and Sports Science' journals in the grey literature                                      |
| Grey literature: English only                                                                                                                                     | Database searches: Studies that cannot be translated to English                                                                |
|                                                                                                                                                                   | Grey literature: Non-English studies                                                                                           |

**Supplementary Table S3.** Macronutrient recommendations from the literature for pregnant women receiving dialysis.

| Daily Amount                                 | Energy                                                                                                  | Carbohydrate          | Protein                                                | Fat                                                                                         | Fibre           | Fluid             | Other        |
|----------------------------------------------|---------------------------------------------------------------------------------------------------------|-----------------------|--------------------------------------------------------|---------------------------------------------------------------------------------------------|-----------------|-------------------|--------------|
| NRV Female (Pregnancy 14-50 years) [1]       | 1st trimester:<br>No additional requirement<br>2nd trimester: +1.4 MJ/day<br>3rd trimester: +1.9 MJ/day | No EAR, RDI or AI set | RDI: 58-60 g/day or 1.00-1.02 g/kg/day                 | AI: 10 g/day (Linoleic acid)<br>1.0 g/day (a-Linoleic acid)<br>110-115 mg/day (DHA+EPA+DPA) | AI: 25-28 g/day | AI: 1.8-2.3 L/day | N/A          |
| KDOQI Dialysis Guidelines [2]                | 25-35 kcal/kg/day                                                                                       | Not reported          | 1.0-1.2 g/kg/day (HD/PD)                               | Not reported                                                                                | Not reported    | Not reported      | N/A          |
| <i>Consensus Guidelines/Position Papers</i>  |                                                                                                         |                       |                                                        |                                                                                             |                 |                   |              |
| de Jong et al. (2022)<br>The Netherlands [3] | Not reported                                                                                            | Not reported          | 1.5-1.8 g/kg IBW/day (HD)                              | Not reported                                                                                | Not reported    | Not reported      | Not reported |
| Schmidt et al. (2022)<br>Germany [4]         | 1st trimester: 30-35 kcal/kg/day<br>2nd/3rd trimesters: 30-35 kcal/kg/day + 300 kcal (HD)               | Not reported          | 1.2 g/kg pre-pregnancy weight/day + 10 g/day (HD/CAPD) | Not reported                                                                                | Not reported    | Not reported      | Not reported |
| Cabiddu et al. (2015)<br>Italy [5]           | Not reported                                                                                            | Not reported          | Not reported                                           | Not reported                                                                                | Not reported    | Not reported      | Not reported |
| Wiles et al. (2019)<br>United Kingdom [6]    | Not reported                                                                                            | Not reported          | 1.5-1.8 g/kg IBW/day (HD) [7]                          | Not reported                                                                                | Not reported    | Not reported      | Not reported |
| <i>Reviews</i>                               |                                                                                                         |                       |                                                        |                                                                                             |                 |                   |              |
| Esposito et al. (2020)<br>Italy [8]          | 1st trimester: 30-35 kcal/kg/day (HD), 25-30 kcal/kg/day (PD)<br>2nd/3rd trimesters:                    | Not reported          | 1.2 g/kg/day + 10g/day (HD/PD) [10,11]                 | Not reported                                                                                | Not reported    | Not reported      | Not reported |

[illegible]



| Daily Amount                                                 | Energy                                                                                                                                                   | Carbohydrate    | Protein                                                                                                                                      | Fat          | Fibre        | Fluid            | Other        |
|--------------------------------------------------------------|----------------------------------------------------------------------------------------------------------------------------------------------------------|-----------------|----------------------------------------------------------------------------------------------------------------------------------------------|--------------|--------------|------------------|--------------|
| Hou & Firanek (1998)<br>United States [22]                   | Not reported                                                                                                                                             | Not reported    | Not reported                                                                                                                                 | Not reported | Not reported | Not reported     | Not reported |
| Brookhyser & Wiggins (1998)<br>United States [23]            | 2nd/3rd trimesters:<br>BEE x activity factor (1.2 to 1.4) + 300 kcal (individualise)                                                                     | Not reported    | 1.2 g/kg IBW + 10g (HD)<br>1.4 g/kg IBW + 10g (PD)                                                                                           | Not reported | Not reported | 1,000-2,000 mL   | Not reported |
| Reddy & Holley (2007)<br>United States [24]                  | 30-35 kcal/kg/day                                                                                                                                        | Not reported    | 1.5 g/kg/day (HD)<br>1.8 g/kg/day (PD)                                                                                                       | Not reported | Not reported | 750-1,500 mL/day | Not reported |
| Oliverio & Hladunewich (2020)<br>United States & Canada [25] | Not reported                                                                                                                                             | Not reported    | 1.5-1.8 g/kg/day                                                                                                                             | Not reported | Not reported | Not reported     | Not reported |
| Reyes-López et al. (2020)<br>Mexico & Italy [9]              | 1st trimester:<br>105-146 kJ/kg/ day + 289 kJ<br>2nd trimester: 105-146 kJ/kg/ day + 1,100-1,423 kJ<br>3rd trimester: 105-146 kJ/kg/ day + 1,891-2096 kJ | ≥175 g/day [26] | 1st trimester:<br>1.1-1.5 g/kg/day + 0.7g<br>2nd trimester: 1.1-1.5 g/kg/day + 9.6g<br>3rd trimester:<br>1.1-1.5 g/kg/day + 31.2g<br>[27,28] |              |              |                  |              |
| Tangren et al. (2018)<br>United States & Canada [29]         | Not reported                                                                                                                                             | Not reported    | 1.5-1.8 g/kg/day (HD) [30]                                                                                                                   | Not reported | Not reported | Not reported     | Not reported |
| Vecchio et al. (2021)<br>Italy [31]                          | 146.4 kJ/kg (35 kcal/kg) (HD)<br>104.6 kJ/kg (25 kcal/kg) (PD) [32]                                                                                      | Not reported    | 1.2 g/kg pre-gestational weight/day (HD)<br>1.4 g/kg                                                                                         | Not reported | Not reported | Not reported     | Not reported |

| Daily Amount                                   | Energy                                                                                           | Carbohydrate | Protein                                                         | Fat          | Fibre        | Fluid        | Other                                          |
|------------------------------------------------|--------------------------------------------------------------------------------------------------|--------------|-----------------------------------------------------------------|--------------|--------------|--------------|------------------------------------------------|
|                                                |                                                                                                  |              | pre-gestational weight/day (PD) [32]                            |              |              |              |                                                |
| Kapoor et al. (2009)<br>United Kingdom [33]    | Not reported                                                                                     | Not reported | 1.5 g/kg/day (HD)<br>1.8 g/kg/day (PD)                          | Not reported | Not reported | Not reported | Not reported                                   |
| Castellano et al. (2011)<br>Italy [34]         | Not reported                                                                                     | Not reported | 1 g/kg/day + 20 g/day (HD) [11,35] or<br>1.8 g/kg/day (HD) [15] | Not reported | Not reported | Not reported | Avoid protein restriction of 1.2-1.3 g/kg/day. |
| Hladunewich et al. (2011)<br>Canada [36]       | Not reported                                                                                     | Not reported | 1.5-1.8 g/kg/day (HD)                                           | Not reported | Not reported | Not reported | Not reported                                   |
| Stover (2010)<br>United States [37]            | 1st trimester: 30-35 kcal/kg IBW/day<br>2nd/3rd trimesters: 30-35 kcal/kg IBW/day + 300 kcal/day | Not reported | 1.2-1.8 g/kg IBW/day (HD) [24]<br>1.2-1.3 g/kg IBW (PD) [27]    | Not reported | Not reported | Not reported | Not reported                                   |
| Hall & Brunskill (2010)<br>United Kingdom [38] | Not reported                                                                                     | Not reported | ≥1.8 g/kg/day                                                   | Not reported | Not reported | Not reported | Not reported                                   |
| Kothari et al. (2019)<br>United States [39]    | 25-35 kcal/kg pregnant weight/ day [40]                                                          | Not reported | 1.5-1.8 g/kg pre-pregnancy weight/day + 20 g/day [40]           | Not reported | Not reported | Not reported | Not reported                                   |
| Lim & Wah (2018)                               | 3,035 kcal/kg/day                                                                                | Not reported | 1.8 g/kg/day (HD) [42]                                          | Not reported | Not reported | Not reported | Not reported                                   |

| Daily Amount                                         | Energy                                                                                                                   | Carbohydrate | Protein                                                | Fat          | Fibre        | Fluid                       | Other        |
|------------------------------------------------------|--------------------------------------------------------------------------------------------------------------------------|--------------|--------------------------------------------------------|--------------|--------------|-----------------------------|--------------|
| Malaysia [41]                                        |                                                                                                                          |              | 1.4-2.1 g/kg/day (PD) [43]                             |              |              |                             |              |
| Vázquez-Rodríguez (2010) Mexico [44]                 | 35-40 kcal/kg/day (PD)                                                                                                   | Not reported | 1 g/kg/day + 20 g/day to 1.8 g/kg/day (PD)             | Not reported | Not reported | Not reported                | Not reported |
| Hou (2004) United States [45]                        | Not reported                                                                                                             | Not reported | Not reported                                           | Not reported | Not reported | Not reported                | Not reported |
| Onder et al. (2016) United States [46]               | 30-35 kcal/kg/day [24,47-49]                                                                                             | Not reported | 1.5 g/kg/day (HD) 1.8 g/kg/day (PD) [24,47-49]         | Not reported | Not reported | 750-1,500 mL/day [24,47-49] | Not reported |
| Wiles & Oliveira (2019) United Kingdom & Brazil [50] | Not reported                                                                                                             | Not reported | Not reported                                           | Not reported | Not reported | Not reported                | Not reported |
| Furaz-Czerpak et al. (2012) Spain [51]               | 30-35 kcal/kg/day                                                                                                        | Not reported | 1-1.2 g/kg pre-pregnancy weight/day + 10-20 g/day (HD) | Not reported | Not reported | Not reported                | Not reported |
| Singh & Pradeep (2012) India [52]                    | Not reported                                                                                                             | Not reported | 1 g/kg/day + 20 g/day [48]                             | Not reported | Not reported | Not reported                | Not reported |
| Stover (2007) United States [53]                     | 1st trimester: 35 kcal/kg pre-gravid IBW/day<br>2nd/3rd trimesters: 35 kcal/kg pre-gravid IBW/day + 300 kcal/day [27,54] | Not reported | 1.2-1.3 g/kg IBW/day + ≥10 g/day [27,54]               | Not reported | Not reported | Not reported                | Not reported |
| Shehaj & Kazancioglu (2023)                          | 25-35 kcal/kg pregnant weight/ day [56]                                                                                  | Not reported | 1.8 g/pre-pregnancy weight/day +                       | Not reported | Not reported | Not reported                | Not reported |

| Daily Amount                               | Energy                                                           | Carbohydrate | Protein                                                                                                       | Fat          | Fibre        | Fluid        | Other        |
|--------------------------------------------|------------------------------------------------------------------|--------------|---------------------------------------------------------------------------------------------------------------|--------------|--------------|--------------|--------------|
| Turkey & Albania [55]                      |                                                                  |              | 20 g/day [56]                                                                                                 |              |              |              |              |
| Vázquez Rodríguez (2010) Mexico [57]       | Not reported                                                     | Not reported | 1 g/kg/day + 20 g/24 hours [23] or 1.8 g/kg/day [15]                                                          | Not reported | Not reported | Not reported | Not reported |
| Porter (2009) United States [58]           | 30-35 kcal/kg/day [53]                                           | Not reported | 1.3-1.5 g/kg/day [53]                                                                                         | Not reported | Not reported | Not reported | Not reported |
| Hou & Elahi (2005) United States [59]      | Not reported                                                     | Not reported | Not reported                                                                                                  | Not reported | Not reported | Not reported | Not reported |
| Nikolskaya & Prokopenko (2014) Russia [60] | 30-35 kcal/kg/day + 300 kcal/day [51,61]                         | Not reported | 1.5-1.8 g/kg/day [51,61]                                                                                      | Not reported | Not reported | Not reported | Not reported |
| Hui & Hladunewich (2019) Canada [62]       | Not reported                                                     | Not reported | 1.5-1.8 g/kg/day                                                                                              | Not reported | Not reported | Not reported | Not reported |
| Hou (1999) United States [11]              | 35 kcal/kg/day + 300 kcal (HD)<br>25 kcal/kg/day + 300 kcal (PD) | Not reported | 1.2 g/kg ideal pre-gravid weight + 10g (HD)<br>1.4 g/kg ideal pre-gravid weight + 10g + dialysate losses (PD) | Not reported | Not reported | Not reported | Not reported |
| Davison (1991) United Kingdom [63]         | Not reported                                                     | Not reported | 70 g/day                                                                                                      | Not reported | Not reported | Not reported | Not reported |
| Hou (1987) United States [64]              | Not reported                                                     | Not reported | Not reported                                                                                                  | Not reported | Not reported | Not reported | Not reported |
| Oliverio et al.                            | Not reported                                                     | Not reported | 1.5-1.8 g/kg/day                                                                                              | Not reported | Not reported | Not reported | Not reported |

[illegible]

| Daily Amount                                          | Energy            | Carbohydrate | Protein                                                   | Fat          | Fibre        | Fluid        | Other                                                                                  |
|-------------------------------------------------------|-------------------|--------------|-----------------------------------------------------------|--------------|--------------|--------------|----------------------------------------------------------------------------------------|
| <b>[73]</b>                                           |                   |              |                                                           |              |              |              |                                                                                        |
| Kondakova et al. (2023)<br>Russia <b>[74]</b>         | Not reported      | Not reported | Not reported                                              | Not reported | Not reported | Not reported | Not reported                                                                           |
| Cao et al. (2018)<br>China <b>[75]</b>                | 35-40 kcal/kg/day | Not reported | 1 g/kg/day +<br>20 g/day                                  | Not reported | Not reported | Not reported | Energy:<br>25-35 kcal/day<br>Protein: 1.2-1.4<br>g/kg/day +<br>20 g/day <b>[47]</b>    |
| Arai et al. (2020)<br>Japan <b>[76]</b>               | Not reported      | Not reported | Not reported                                              | Not reported | Not reported | Not reported | Not reported                                                                           |
| Sprenger-Mähr et al. (2019)<br>Austria <b>[77]</b>    | Not reported      | Not reported | Not reported                                              | Not reported | Not reported | Not reported | Not reported                                                                           |
| Mambap et al. (2023)<br>Cameroon <b>[78]</b>          | Not reported      | Not reported | Not reported                                              | Not reported | Not reported | Not reported | Not reported                                                                           |
| Buil et al. (2015)<br>Spain <b>[79]</b>               | Not reported      | Not reported | Not reported                                              | Not reported | Not reported | Not reported | Not reported                                                                           |
| Manisco et al. (2015)<br>Italy <b>[47]</b>            | 25-35 kcal/kg/day | Not reported | 1.2-1.4 g/kg<br>pre-pregnancy<br>weight/day +<br>20 g/day | Not reported | Not reported | Not reported | Avoid protein<br>restriction of<br><1.2-1.3 g/kg/day<br>(HD) and 1.4<br>g/kg/day (PD). |
| Seker (2016)<br>Turkey <b>[80]</b>                    | 2,000 kcal/day    | Not reported | 1.5 g/kg/day<br>(protein-rich diet)                       | Not reported | Not reported | Not reported | Not reported                                                                           |
| Shanmugalingam et al. (2021)<br>Australia <b>[81]</b> | Not reported      | Not reported | 1.8-2 g/kg/day<br>(incremental high-<br>protein diet)     | Not reported | Not reported | Not reported | Not reported                                                                           |
| Haase et al. (2005)<br>Germany <b>[82]</b>            | 3,000 kcal/day    | Not reported | >100 g/day<br>(high-protein diet<br>encouraged)           | Not reported | Not reported | Not reported | More frequent<br>dialysis allows for<br>a higher                                       |

| Daily Amount                                | Energy                                          | Carbohydrate                                       | Protein                                                                                                           | Fat                               | Fibre        | Fluid                                     | Other                                                                                 |
|---------------------------------------------|-------------------------------------------------|----------------------------------------------------|-------------------------------------------------------------------------------------------------------------------|-----------------------------------|--------------|-------------------------------------------|---------------------------------------------------------------------------------------|
|                                             |                                                 |                                                    |                                                                                                                   |                                   |              |                                           | protein intake (1.5 g/kg/day).                                                        |
| Yu et al. (2015)<br>China [83]              | Not reported                                    | Not reported                                       | 1 g/kg/day + 20 g/day [15,84,85]                                                                                  | Not reported                      | Not reported | Not reported                              | Not reported                                                                          |
| Espinoza et al. (2013)<br>Chile [86]        | 35 kcal/kg/day + 300 kcal                       | Not reported                                       | 1.8 g/kg/day                                                                                                      | Not reported                      | Not reported | Not reported                              | ≥1.5 g/kg/day protein                                                                 |
| Choi et al. (2018)<br>Korea [87]            | 2,000 kcal/day                                  | Not reported                                       | 1.5 g/kg/day                                                                                                      | Not reported                      | Not reported | Not reported                              | Energy: 30-35 kcal/day<br>Protein: 1.8 g/kg/day [11]                                  |
| Tuot et al. (2009)<br>United States [88]    | 2,100-2,250 kcal/day (REE x 1.2-1.3 + 300 kcal) | 100g dextrose (340 kcal) from IDPN                 | 75-85 g/day protein (metabolically active weight x 1.4-1.5) and 95g protein (15% amino acids, 380 kcal) from IDPN | 40g of lipid (400 kcal) from IDPN | Not reported | Not reported                              | Increase daily caloric intake by 300 kcal [89] and aim for 1.8 g/kg/day protein [15]. |
| Ribeiro & Silva (2020)<br>Portugal [90]     | 35 kcal/kg/day + 300 kcal/day                   | Not reported                                       | 1.8 g/kg of pre-pregnancy weight/day + 10-20 g/day [91,92]                                                        | Not reported                      | Not reported | Not reported                              | Not reported                                                                          |
| Giofre' et al. (2007)<br>Italy [93]         | 35 kcal/kg/day (cases 2, 3)                     | Not reported                                       | 1.8-2 g/kg/day (high-protein diet) (cases 2,3)                                                                    | Not reported                      | Not reported | Not reported                              | Not reported                                                                          |
| Malik et al. (1997)<br>Saudi Arabia [94]    | Not reported                                    | Not reported                                       | Not reported                                                                                                      | Not reported                      | Not reported | Not reported                              | Not reported                                                                          |
| Campos-Collado et al. (2016)<br>Mexico [95] | ~2,000 kcal/day                                 | 55% TEI, then 45% TEI or 230 g/day from 22.2 weeks | 19% TEI or 99 g/day protein (1.4 g/kg                                                                             | 26% TEI                           | 28 g/day     | 1,000-1,100 mL/day (no fluid restriction) | Energy: 30-35 kcal/kg/day [24,52,96]                                                  |

[illegible]



| Daily Amount                                        | Energy                                             | Carbohydrate | Protein                                        | Fat                           | Fibre        | Fluid                                       | Other                                              |
|-----------------------------------------------------|----------------------------------------------------|--------------|------------------------------------------------|-------------------------------|--------------|---------------------------------------------|----------------------------------------------------|
| Pepperell & Dawborn (1970)<br>Australia [103]       | Not reported                                       | Not reported | 40 g/day protein diet (restriction)            | Not reported                  | Not reported | Not reported                                | Not reported                                       |
| Abu-Zaid et al. (2013)<br>Saudi Arabia [104]        | 3,000 kcal/day                                     | Not reported | 100 g/day                                      | Not reported                  | Not reported | Not reported                                | 30-35 kcal/day<br>1.8 g/kg/day + 20g [11,13]       |
| Al-Saran & Sabry (2008)<br>Saudi Arabia [105]       | Not reported                                       | Not reported | 1 g/kg/day + 20 g/day [15]                     | Not reported                  | Not reported | Not reported                                | Not reported                                       |
| Ackrill et al. (1975)<br>United Kingdom [106]       | Not reported                                       | Not reported | Not reported                                   | Not reported                  | Not reported | Not reported                                | Not reported                                       |
| Gómez Vázquez et al. (2007)<br>Mexico [107]         | 45 kcal/kg/day (case 1)<br>30 kcal/kg/day (case 2) | Not reported | 1.5 g/kg/day (case 1)<br>1.3 g/kg/day (case 2) | <30% polyunsaturated (case 2) | Not reported | 1.5 L/day (case 1)<br>Free liquids (case 2) | 1 g/kg/day protein + 20g [27]                      |
| Mohammed et al. (2021)<br>Trinidad and Tobago [108] | 2,500-3,000 kcal/day                               | Not reported | 1.5-1.8 g/kg/day                               | Not reported                  | Not reported | Not reported                                | Not reported                                       |
| Alhwiesh (2015)<br>Saudi Arabia [109]               | 45 kcal/kg/day                                     | Not reported | 1.5 g/kg/day                                   | Not reported                  | Not reported | 1,500 mL/day                                | Not reported                                       |
| Pipili et al. (2011)<br>Greece [110]                | Not reported                                       | Not reported | 1.8 g/kg/day                                   | Not reported                  | Not reported | Not reported                                | Not reported                                       |
| Ramadani et al. (2018)<br>Indonesia [111]           | 30-35 kcal/kg/day                                  | Not reported | 0.6-1.5g/kg/day (controlled protein)           | Not reported                  | Not reported | 750-1,500 mL/day                            | Protein:<br>1.5 g/kg/day (HD)<br>1.8 g/kg/day (PD) |
| Hussain et al. (2005)<br>United States [112]        | Not reported                                       | Not reported | 1.6-1.8 g/kg/day (case 1)                      | Not reported                  | Not reported | Not reported                                | Not reported                                       |

| Daily Amount                                       | Energy                                           | Carbohydrate | Protein                                                         | Fat          | Fibre        | Fluid        | Other                                          |
|----------------------------------------------------|--------------------------------------------------|--------------|-----------------------------------------------------------------|--------------|--------------|--------------|------------------------------------------------|
| Kedzierska et al. (2011)<br>Poland & Germany [113] | Not reported                                     | Not reported | Not reported                                                    | Not reported | Not reported | Not reported | Not reported                                   |
| Bahadi et al. (2010)<br>Morocco [61]               | Not reported                                     | Not reported | 1.8 g/kg/day [42,114]                                           | Not reported | Not reported | Not reported | Not reported                                   |
| López-Menclero et al. (2004)<br>Spain [115]        | 35 kcal/kg gestational weight/day + 300 kcal/day | Not reported | 1-1.2g/kg pre-pregnancy weight/day + 10-20 g/day                | Not reported | Not reported | Not reported | Not reported                                   |
| Coyle et al. (2008)<br>United States [116]         | Not reported                                     | Not reported | IBW + 10g                                                       | Not reported | Not reported | Not reported | Protein: 1-1.5 g/kg/day [23,96,117]            |
| Sheriff et al. (1978)<br>United Kingdom [118]      | Not reported                                     | Not reported | 80 g/day                                                        | Not reported | Not reported | Not reported | Not reported                                   |
| Walsh (2002)<br>United Kingdom [119]               | Not reported                                     | Not reported | 1.8 g/kg/day [120] (this would mean >400 g/day for the patient) | Not reported | Not reported | Not reported | Not reported                                   |
| Cocîrță et al. (2016)<br>Romania [121]             | Not reported                                     | Not reported | 1.8 g/kg/day (HD) [122]                                         | Not reported | Not reported | Not reported | Not reported                                   |
| Guida et al. (2003)<br>Italy [123]                 | 35 kcal/kg/day + 300-400 kcal/day                | Not reported | 1.2 g/kg/day + 6 g/day                                          | Not reported | Not reported | Not reported | Protein: >1.5 g/kg/day with higher doses of HD |

| Daily Amount                                           | Energy                                                            | Carbohydrate | Protein                                           | Fat          | Fibre        | Fluid                 | Other                                                                                                                                            |
|--------------------------------------------------------|-------------------------------------------------------------------|--------------|---------------------------------------------------|--------------|--------------|-----------------------|--------------------------------------------------------------------------------------------------------------------------------------------------|
|                                                        |                                                                   |              |                                                   |              |              |                       | [67,85,124]                                                                                                                                      |
| McPhatter & Drumheller (2008) United States [125]      | 2,000 kcal/day                                                    | Not reported | 70 g/day                                          | Not reported | Not reported | Not reported          | Energy: 35 kcal/kg IBW/day (1st trimester), 35 kcal/kg IBW/day + 300 kcal/day (2nd/3rd trimesters) [126]<br>Protein: 1.2 g/kg IBW/day + 10 g/day |
| Sandhu et al. (2014) United States [127]               | Not reported                                                      | Not reported | 1 g/kg/day + 20 g/day [30]                        | Not reported | Not reported | Not reported          | Not reported                                                                                                                                     |
| Brookhyser (1989) United States [128]                  | 1,900 kcal/day + 300 kcal/day                                     | Not reported | 1.5 g/kg/day (125g high biological value protein) | Not reported | Not reported | Not reported          | Not reported                                                                                                                                     |
| Park et al. (2006) Korea [129]                         | Not reported                                                      | Not reported | 1.5-1.8 g/kg/day                                  | Not reported | Not reported | Not reported          | Not reported                                                                                                                                     |
| Yattara et al. (2019) Mali & Republic of Senegal [130] | 30-35 kcal/kg/day                                                 | Not reported | 1.2 g/kg/day                                      | Not reported | Not reported | 750-1500 mL/day [131] | Not reported                                                                                                                                     |
| Seed & Gilbertson (2022) Australia [132]               | Not reported                                                      | Not reported | Not reported                                      | Not reported | Not reported | Not reported          | Not reported                                                                                                                                     |
| Henderson (1996) United States [133]                   | 2,000 kcals/day (30 kcals/kg pre-gravida weight + 250 kcals/day), | Not reported | 70-80 g/day (1.2 g/kg IBW + 10-20 g/day) [70]     | Not reported | Not reported | Not reported          | Not reported                                                                                                                                     |

| Daily Amount                                          | Energy                                                                                                | Carbohydrate | Protein                                                                                   | Fat          | Fibre        | Fluid                      | Other        |
|-------------------------------------------------------|-------------------------------------------------------------------------------------------------------|--------------|-------------------------------------------------------------------------------------------|--------------|--------------|----------------------------|--------------|
|                                                       | then 2,200 kcal/day at<br>28 weeks gestation<br>[134]                                                 |              |                                                                                           |              |              |                            |              |
| Melendez et al.<br>(1988)<br>United States<br>[135]   | 35-45 kcal/kg IBW/day<br>+<br>300 kcal/day [136]                                                      | Not reported | 1.2-1.5 g/kg<br>IBW/day +<br>30 g/day (CAPD)<br>[136]                                     | Not reported | Not reported | Not reported               | Not reported |
| Vidal et al. (1998)<br>Uruguay [137]                  | 1st trimester: 35<br>kcal/kg IBW/day<br>2nd trimester: 35<br>kcal/kg dry weight/day<br>+ 300 kcal/day | Not reported | 1st trimester:<br>1.1-1.2 g/kg<br>IBW/day<br>2nd trimester:<br>1.5 g/kg dry<br>weight/day | Not reported | Not reported | Not reported               | Not reported |
| Hou et al. (1993)<br>United States<br>[138]           | Not reported                                                                                          | Not reported | Not reported                                                                              | Not reported | Not reported | Not reported               | Not reported |
| Brookhyser et al.<br>(1996)<br>United States<br>[139] | 1,700-1,900 kcal/day<br>(cases 1,2)                                                                   | Not reported | >70 g/day<br>(case 1)                                                                     | Not reported | Not reported | 40 oz/day<br>(liberalised) | Not reported |
| Amoah & Arab<br>(1991)<br>Saudi Arabia [140]          | Not reported                                                                                          | Not reported | Not reported                                                                              | Not reported | Not reported | Not reported               | Not reported |
| Shah et al. (2007)<br>United Kingdom<br>[141]         | Not reported                                                                                          | Not reported | Not reported                                                                              | Not reported | Not reported | Not reported               | Not reported |
| Dunbeck et al.<br>(1992)<br>United States<br>[142]    | Not reported                                                                                          | Not reported | Not reported                                                                              | Not reported | Not reported | Not reported               | Not reported |
| Cattran & Benzie<br>(1983)<br>Canada [143]            | Not reported                                                                                          | Not reported | 60 g/day                                                                                  | Not reported | Not reported | Not reported               | Not reported |

| Daily Amount                                          | Energy                                                             | Carbohydrate | Protein                                                   | Fat          | Fibre        | Fluid                                                   | Other        |
|-------------------------------------------------------|--------------------------------------------------------------------|--------------|-----------------------------------------------------------|--------------|--------------|---------------------------------------------------------|--------------|
| Villa et al. (2007)<br>Italy [144]                    | Not reported                                                       | Not reported | 1.2-1.3 g/kg/day<br>[11,35] or<br>1.8 g/kg/day [15]       | Not reported | Not reported | Not reported                                            | Not reported |
| Racette (1997)<br>British<br>Columbia<br>[145]        | Not reported                                                       | Not reported | Not reported                                              | Not reported | Not reported | Not reported                                            | Not reported |
| Molaison et al.<br>(2003)<br>United States<br>[89]    | Increase caloric intake<br>by<br>300 kcal/day [146]                | Not reported | Increase protein<br>intake by<br>10 g/day [146]           | Not reported | Not reported | Not reported                                            | Not reported |
| Stover (2004)<br>United States<br>[126]               | 35 kcal/kg IBW or<br>SBW/day +<br>300 kcal (2nd/3rd<br>trimesters) | Not reported | 1.2 g/kg IBW/day<br>+ 10 g/day<br>(2nd/3rd<br>trimesters) | Not reported | Not reported | Not reported                                            | Not reported |
| Unzelman et al.<br>(1973)<br>United States<br>[147]   | 2,200 kcal/day                                                     | Not reported | 80g/day                                                   | Not reported | Not reported | Unrestricted                                            | Not reported |
| Perry (1994)<br>United States<br>[148]                | 2,000 kcal/day                                                     | Not reported | 60 g/day                                                  | Not reported | Not reported | 800 mL/day, then<br>500 mL/day<br>above urine<br>output | Not reported |
| Sivasuthan et al.<br>(2013)<br>Australia [149]        | Not reported                                                       | Not reported | Not reported                                              | Not reported | Not reported | Not reported                                            | Not reported |
| <b>Editorials</b>                                     |                                                                    |              |                                                           |              |              |                                                         |              |
| Levy et al. (1998)<br>United States &<br>France [120] | Not reported                                                       | Not reported | 1 g/kg/day +<br>20 g/day [12]                             | Not reported | Not reported | Not reported                                            | Not reported |

| Daily Amount                          | Energy                                                                            | Carbohydrate                                                                                      | Protein                                                       | Fat                                                                                                                                                                                                        | Fibre        | Fluid                                                                                            | Other                                                                                                     |
|---------------------------------------|-----------------------------------------------------------------------------------|---------------------------------------------------------------------------------------------------|---------------------------------------------------------------|------------------------------------------------------------------------------------------------------------------------------------------------------------------------------------------------------------|--------------|--------------------------------------------------------------------------------------------------|-----------------------------------------------------------------------------------------------------------|
| Mercadal & Nizard (2019) France [150] | Not reported                                                                      | Not reported                                                                                      | 1.5-2 g/kg/day                                                | Not reported                                                                                                                                                                                               | Not reported | Not reported                                                                                     | Not reported                                                                                              |
| Hou (2002) United States [151]        | Not reported                                                                      | Not reported                                                                                      | Not reported                                                  | Not reported                                                                                                                                                                                               | Not reported | Not reported                                                                                     | Not reported                                                                                              |
| Ellis (2012) United Kingdom [152]     | Not reported                                                                      | Not reported                                                                                      | 1.8 g/kg/day (HD) [153]                                       | Not reported                                                                                                                                                                                               | Not reported | Not reported                                                                                     | Not reported                                                                                              |
| Jagielski (2015) United States [154]  | 30-35 kcal/kg/day + 300 kcal/day (2nd/3rd trimesters) (HD) [155]                  | Not reported                                                                                      | 1.2 g/kg/day + 10 g/day (HD) [155]                            | Not reported                                                                                                                                                                                               | Not reported | Not reported                                                                                     | Not reported                                                                                              |
| <b>Book Chapters</b>                  |                                                                                   |                                                                                                   |                                                               |                                                                                                                                                                                                            |              |                                                                                                  |                                                                                                           |
| Lawrence (2012) United States [156]   | 1st trimester: BEE × activity factor (1.2-1.4) or 35 kcal/kg of pre-pregnancy IBW | Remaining calories to be met with CHO sources (after protein and fat requirements have been met). | 1.1-1.4 g/kg of pre-pregnancy IBW + 10 g/day (HD)             | Saturated fat <7% TEI, trans-fat <1% TEI, cholesterol <300 mg/day.                                                                                                                                         | Not reported | 1,000-2,000 mL/ interdialytic interval. Not to exceed 2 kg interdialytic fluid weight gain (HD). | When calculating energy prescription for women on PD, factor in glucose calories received from dialysate. |
|                                       | 2nd/3rd trimesters: Add 300 kcal/dL (HD/PD) [11,53,157]                           |                                                                                                   | 1.2-1.5 g/kg of pre-pregnancy IBW + 10 g/day (PD) [11,53,157] | Hyperlipidemia: Total fat intake 25%-35% TEI, saturated fat <7% TEI, remaining fat calories (up to 20%) distributed toward mono-unsaturated fats and poly-unsaturated fats, cholesterol <200 mg/day [158]. |              | Maintain fluid balance and monitor fluid retention status (PD) [11,53,157].                      |                                                                                                           |
| Flecha (2020) United States           | Not reported                                                                      | Not reported                                                                                      | 1 g/ kg/day + 20 g/day                                        | Not reported                                                                                                                                                                                               | Not reported | Not reported                                                                                     | Not reported                                                                                              |

| Daily Amount                             | Energy                                                                                            | Carbohydrate | Protein                                                                                                                   | Fat          | Fibre        | Fluid        | Other                                                                                                                                 |
|------------------------------------------|---------------------------------------------------------------------------------------------------|--------------|---------------------------------------------------------------------------------------------------------------------------|--------------|--------------|--------------|---------------------------------------------------------------------------------------------------------------------------------------|
| <b>[159]</b>                             |                                                                                                   |              |                                                                                                                           |              |              |              |                                                                                                                                       |
| Pahl (2019)<br>United States             | 3,000 kcal/day [15]                                                                               | Not reported | 1.8 g/kg/day [15]                                                                                                         | Not reported | Not reported | Not reported | Not reported                                                                                                                          |
| <b>[160]</b>                             |                                                                                                   |              |                                                                                                                           |              |              |              |                                                                                                                                       |
| Sandhu (2016)<br>United States           | Not reported                                                                                      | Not reported | 1 g/kg/day +<br>20 g/day [30]                                                                                             | Not reported | Not reported | Not reported | Not reported                                                                                                                          |
| <b>[161]</b>                             |                                                                                                   |              |                                                                                                                           |              |              |              |                                                                                                                                       |
| Hou (1994)<br>United States              | Not reported                                                                                      | Not reported | 1 g/kg/day + 20g<br>(HD)<br>1.5 g/kg/day + 20g<br>(CAPD)                                                                  | Not reported | Not reported | Not reported | Not reported                                                                                                                          |
| <b>[13]</b>                              |                                                                                                   |              |                                                                                                                           |              |              |              |                                                                                                                                       |
| Fisher et al.<br>(2018)<br>United States | 30-35 kcal/kg/day [11]                                                                            | Not reported | 1.5 g/kg/day (HD)<br>1.8 g/kg/day (PD)<br>[11]                                                                            | Not reported | Not reported | Not reported | Increasing<br>delivery of<br>dialysis is<br>recommended for<br>worsening<br>azotemia rather<br>than strict<br>protein<br>restriction. |
| <b>[162]</b>                             |                                                                                                   |              |                                                                                                                           |              |              |              |                                                                                                                                       |
| Stover<br>(2008)<br>United States        | 35 kcal/kg/day pre-<br>gravid IBW + 300 kcal/<br>day (2nd/3rd<br>trimesters)<br>[10,16,27,54,137] | Not reported | 1.2 g/kg<br>pre-gravid IBW +<br>10 g/day (HD)<br>1.2-1.3 g/kg<br>pre-gravid IBW +<br>10 g/day (PD)<br>[10,27,54]          | Not reported | Not reported | Not reported | Not reported                                                                                                                          |
| <b>[163]</b>                             |                                                                                                   |              |                                                                                                                           |              |              |              |                                                                                                                                       |
| Stover<br>(2014)<br>United States        | 35 kcal/kg<br>pre-gravida SBW +<br>300/day<br>(2nd/3rd<br>trimesters)<br>[10,27,53,137,165,166]   | Not reported | 1.2 g/kg<br>pre-gravida SBW<br>+ 10-25 g/day<br>(HD)<br>1.2-1.3 g/kg<br>pre-gravida SBW<br>+ 10-25 g/day (PD)<br>[27,166] | Not reported | Not reported | Not reported | Potentially higher<br>protein<br>requirements<br>more with<br>intensive HD.                                                           |
| <b>[164]</b>                             |                                                                                                   |              |                                                                                                                           |              |              |              |                                                                                                                                       |

| Daily Amount                                       | Energy                                                                                                          | Carbohydrate | Protein                                                                            | Fat          | Fibre        | Fluid        | Other                                                                                                  |
|----------------------------------------------------|-----------------------------------------------------------------------------------------------------------------|--------------|------------------------------------------------------------------------------------|--------------|--------------|--------------|--------------------------------------------------------------------------------------------------------|
| Stover & Trolinger (2020) United States [167]      | 1st trimester: 35 kcal/kg/day of pre-gravida SBW<br>2nd/3rd trimesters: 35 kcal/kg/day + 350-450 kcal/day [168] | Not reported | 1.2 g/kg SBW + 10-25 g/day (HD) 1.2-1.3 g/kg SBW + 10-25 g/day (PD) [10,27,53,166] | Not reported | Not reported | Not reported | Not reported                                                                                           |
| Plant (2008) United Kingdom [169]                  | Up to 3,000 kcal/day [15,117]                                                                                   | Not reported | Up to 1.8 g/kg/day [15,117]                                                        | Not reported | Not reported | Not reported | Not reported                                                                                           |
| Stover (2022) United States [170]                  | 25-35 kcal/kg pre-pregnancy weight/day + 300 kcal/day (2nd/3rd trimesters)                                      | Not reported | 1.0-1.2 g/kg pre-pregnancy weight/day + 10-25 g/day [10,30,53,166]                 | Not reported | Not reported | Not reported | Higher end of protein range with more frequent dialysis is prescribed during pregnancy [10,30,53,166]. |
| Goody & Umans (2004) The Netherlands [171]         | >35 kcal/kg/day + 300 kcal/day [11]                                                                             | Not reported | 1.2 g/kg ideal pre-gravid weight + 10g (HD) [11]                                   | Not reported | Not reported | Not reported | Caloric and protein intake is decreased in PD patients [11].                                           |
| Vellanki & Hou (2019) United States [172]          | Not reported                                                                                                    | Not reported | 1.1 g/kg/day                                                                       | Not reported | Not reported | Not reported | Not reported                                                                                           |
| Shahid et al. (2018) United Kingdom & Canada [173] | Not reported                                                                                                    | Not reported | 1.5-1.8 g/kg/day (HD) [36]                                                         | Not reported | Not reported | Not reported | Not reported                                                                                           |
| Piccoli et al. (2023)                              | Not reported                                                                                                    | Not reported | 1.2-1.5 g/kg/day                                                                   | Not reported | Not reported | Not reported | Not reported                                                                                           |



| Daily Amount | Energy | Carbohydrate | Protein | Fat | Fibre | Fluid | Other |
|--------------|--------|--------------|---------|-----|-------|-------|-------|
| Italy [174]  |        |              |         |     |       |       |       |

Abbreviations: NRV, nutrient reference value; KDOQI, Kidney Disease Outcomes Quality Initiative; EAR, estimated average requirement; RDI, recommended daily intake; AI, adequate intake; DHA, docosahexaenoic acid; EPA, eicosapentaenoic acid; DPA, docosapentaenoic acid; HD, haemodialysis; PD, peritoneal dialysis; CAPD, continuous ambulatory peritoneal dialysis; IBW, ideal body weight; REE, resting energy expenditure; IDPN, intradialytic parenteral nutrition; TEL, total energy intake; BEE, basal energy expenditure; CHO, carbohydrate(s); SBW, standard body weight.

**Supplementary Table S4.** Vitamin recommendations from the literature for pregnant women receiving dialysis.

| Daily Amount                                | Vitamin A (RE)      | Vitamin C         | Vitamin D                                | Vitamin E      | Vitamin K     | Vitamin B1       | Vitamin B2      | Vitamin B3     | Vitamin B5   | Vitamin B6      | Vitamin B12     | Folate          | Biotin        |
|---------------------------------------------|---------------------|-------------------|------------------------------------------|----------------|---------------|------------------|-----------------|----------------|--------------|-----------------|-----------------|-----------------|---------------|
| NRV Female (Pregnancy 14-50 years)[1]       | RDI: 700-800 µg/day | RDI: 55-60 mg/day | AI: 5 µg/day                             | AI: 7-8 mg/day | AI: 60 µg/day | RDI: 1.4 mg/ day | RDI: 1.4 mg/day | RDI: 18 mg/day | AI: 5 mg/day | RDI: 1.9 mg/day | RDI: 2.6 µg/day | RDI: 600 µg/day | AI: 30 µg/day |
| KDOQI Dialysis Guidelines [2]               | Not reported        | Not reported      | Not reported                             | Not reported   | Not reported  | Not reported     | Not reported    | Not reported   | Not reported | Not reported    | Not reported    | Not reported    | Not reported  |
| <i>Consensus Guidelines/Position Papers</i> |                     |                   |                                          |                |               |                  |                 |                |              |                 |                 |                 |               |
| de Jong et al. (2022) The Netherlands [3]   | Not reported        | Not reported      | Not reported                             | Not reported   | Not reported  | Not reported     | Not reported    | Not reported   | Not reported | Not reported    | Not reported    | Not reported    | Not reported  |
| Schmidt et al. (2022) Germany [4]           | Not reported        | Not reported      | 1,000-2,000 IU/day 25-OH vitamin D3 (HD) | Not reported   | Not reported  | Not reported     | Not reported    | Not reported   | Not reported | Not reported    | Not reported    | 2-5 mg/day (HD) | Not reported  |
| Cabiddu et al. (2015) Italy [5]             | Not reported        | Not reported      | Not reported                             | Not reported   | Not reported  | Not reported     | Not reported    | Not reported   | Not reported | Not reported    | Not reported    | Not reported    | Not reported  |
| Wiles et al. (2019) United Kingdom [6]      | Not reported        | Not reported      | Not reported                             | Not reported   | Not reported  | Not reported     | Not reported    | Not reported   | Not reported | Not reported    | Not reported    | Not reported    | Not reported  |
| <i>Reviews</i>                              |                     |                   |                                          |                |               |                  |                 |                |              |                 |                 |                 |               |
| Esposito et al. (2020) Italy [8]            | Not reported        | Not reported      | 1,000-2,000 IU/day 25-OH vitamin         | Not reported   | Not reported  | Not reported     | Not reported    | Not reported   | Not reported | Not reported    | Not reported    | 2-5 mg/day (HD) | Not reported  |



[illegible]

[illegible]

| Daily Amount                   | Vitamin A (RE) | Vitamin C    | Vitamin D    | Vitamin E    | Vitamin K    | Vitamin B1   | Vitamin B2   | Vitamin B3   | Vitamin B5   | Vitamin B6   | Vitamin B12  | Folate       | Biotin       |
|--------------------------------|----------------|--------------|--------------|--------------|--------------|--------------|--------------|--------------|--------------|--------------|--------------|--------------|--------------|
| Spain [51]                     |                |              |              |              |              |              |              |              |              |              |              |              |              |
| Singh & Pradeep (2012)         | Not reported   | Not reported | Not reported | Not reported | Not reported | Not reported | Not reported | Not reported | Not reported | Not reported | Not reported | Not reported | Not reported |
| India [52]                     |                |              |              |              |              |              |              |              |              |              |              |              |              |
| Stover (2007)                  | Not reported   | Not reported | Not reported | Not reported | Not reported | Not reported | Not reported | Not reported | Not reported | Not reported | Not reported | Not reported | Not reported |
| United States [53]             |                |              |              |              |              |              |              |              |              |              |              |              |              |
| Shehaj & Kazancioglu (2023)    | Not reported   | Not reported | Not reported | Not reported | Not reported | Not reported | Not reported | Not reported | Not reported | Not reported | Not reported | Not reported | Not reported |
| Turkey & Albania [55]          |                |              |              |              |              |              |              |              |              |              |              |              |              |
| Vázquez-Rodríguez (2010)       | Not reported   | Not reported | Not reported | Not reported | Not reported | Not reported | Not reported | Not reported | Not reported | Not reported | Not reported | Not reported | Not reported |
| Mexico [57]                    |                |              |              |              |              |              |              |              |              |              |              |              |              |
| Porter (2009)                  | Not reported   | Not reported | Not reported | Not reported | Not reported | Not reported | Not reported | Not reported | Not reported | Not reported | Not reported | Not reported | Not reported |
| United States [58]             |                |              |              |              |              |              |              |              |              |              |              |              |              |
| Hou & Elahi (2005)             | Not reported   | Not reported | Not reported | Not reported | Not reported | Not reported | Not reported | Not reported | Not reported | Not reported | Not reported | Not reported | Not reported |
| United States [176]            |                |              |              |              |              |              |              |              |              |              |              |              |              |
| Nikolskaya & Prokopenko (2014) | Not reported   | Not reported | Not reported | Not reported | Not reported | Not reported | Not reported | Not reported | Not reported | Not reported | Not reported | Not reported | Not reported |
| Russia [60]                    |                |              |              |              |              |              |              |              |              |              |              |              |              |
| Hui & Hladunewich (2019)       | Not reported   | Not reported | Not reported | Not reported | Not reported | Not reported | Not reported | Not reported | Not reported | Not reported | Not reported | Not reported | Not reported |
| Canada [62]                    |                |              |              |              |              |              |              |              |              |              |              |              |              |
| Hou (1999)                     | Not reported   | ≥170 mg/day  | Not reported | Not reported | Not reported | 3 mg/day     | 3.4 mg/day   | ≥20 mg/day   | Not reported | >5 mg/day    | Not reported | 1.8 mg/day   | Not reported |
| United States [177]            |                |              |              |              |              |              |              |              |              |              |              |              |              |

| Daily Amount                              | Vitamin A (RE) | Vitamin C    | Vitamin D    | Vitamin E    | Vitamin K    | Vitamin B1   | Vitamin B2   | Vitamin B3   | Vitamin B5   | Vitamin B6   | Vitamin B12  | Folate       | Biotin       |
|-------------------------------------------|----------------|--------------|--------------|--------------|--------------|--------------|--------------|--------------|--------------|--------------|--------------|--------------|--------------|
| Davison (1991) United Kingdom [63]        | Not reported   | Not reported | Not reported | Not reported | Not reported | Not reported | Not reported | Not reported | Not reported | Not reported | Not reported | Not reported | Not reported |
| Hou (1987) United States [64]             | Not reported   | Not reported | Not reported | Not reported | Not reported | Not reported | Not reported | Not reported | Not reported | Not reported | Not reported | Not reported | Not reported |
| Oliverio et al. (2021) United States [65] | Not reported   | Not reported | Not reported | Not reported | Not reported | Not reported | Not reported | Not reported | Not reported | Not reported | Not reported | Not reported | Not reported |
| Ramin et al. (2006) United States [66]    | Not reported   | Not reported | Not reported | Not reported | Not reported | Not reported | Not reported | Not reported | Not reported | Not reported | Not reported | Not reported | Not reported |
| Chan et al. (1998) Canada [67]            | Not reported   | Not reported | Not reported | Not reported | Not reported | Not reported | Not reported | Not reported | Not reported | Not reported | Not reported | Not reported | Not reported |
| Giannattasio et al. (2017) Italy [68]     | Not reported   | Not reported | Not reported | Not reported | Not reported | Not reported | Not reported | Not reported | Not reported | Not reported | Not reported | Not reported | Not reported |
| Hou & Grossman (1990) United States [69]  | Not reported   | Not reported | Not reported | Not reported | Not reported | Not reported | Not reported | Not reported | Not reported | Not reported | Not reported | Not reported | Not reported |
| Grossman et al. (1993) United States [70] | Not reported   | ≥170 mg/day  | Not reported | Not reported | Not reported | 3 mg/day     | 3.4 mg/day   | ≥20 mg/day   | Not reported | ≥5 mg/day    | Not reported | 1.8 mg/day   | Not reported |
| Bili et al. (2013) Greece [71]            | Not reported   | Not reported | Not reported | Not reported | Not reported | Not reported | Not reported | Not reported | Not reported | Not reported | Not reported | Not reported | Not reported |
| Case Reports/Case Series                  |                |              |              |              |              |              |              |              |              |              |              |              |              |

[illegible]



[illegible]

[illegible]

[illegible]

[illegible]

[illegible]

[illegible]

[illegible]

[illegible]



| Daily Amount          | Vitamin<br>A (RE) | Vitamin<br>C | Vitamin<br>D | Vitamin<br>E | Vitamin<br>K | Vitamin<br>B1 | Vitamin<br>B2 | Vitamin<br>B3 | Vitamin<br>B5 | Vitamin<br>B6 | Vitamin<br>B12 | Folate   | Biotin   |
|-----------------------|-------------------|--------------|--------------|--------------|--------------|---------------|---------------|---------------|---------------|---------------|----------------|----------|----------|
| (2023)<br>Italy [174] | reported          | reported     | reported     | reported     | reported     | reported      | reported      | reported      | reported      | reported      | reported       | reported | reported |

Abbreviations: NRV, nutrient reference value; KDOQI, Kidney Disease Outcomes Quality Initiative; EAR, estimated average requirement; RDI, recommended dietary intake

**Supplementary Table S5.** Mineral recommendations from the literature for pregnant women receiving dialysis.

[illegible]

[illegible]

[illegible]

[illegible]

[illegible]

[illegible]

[illegible]





| Daily Amount                                     | Na                         | K                             | Ca                | Mg           | Fe           | Zn           | P                      | I            | Cu           | Se           | Mn           | Mb           |
|--------------------------------------------------|----------------------------|-------------------------------|-------------------|--------------|--------------|--------------|------------------------|--------------|--------------|--------------|--------------|--------------|
| United States [99]                               |                            |                               |                   |              |              |              |                        |              |              |              |              |              |
| Yoo et al. (2004)<br>United States<br>[100]      | Not reported               | Not reported                  | Not reported      | Not reported | Not reported | Not reported | Not reported           | Not reported | Not reported | Not reported | Not reported | Not reported |
| Giatras et al. (1998)<br>United States<br>[15]   | Not reported               | Not reported                  | Not reported      | Not reported | Not reported | Not reported | Not reported           | Not reported | Not reported | Not reported | Not reported | Not reported |
| Luciani et al. (2002)<br>Italy [101]             | Not reported               | Not reported                  | Not reported      | Not reported | Not reported | Not reported | Not reported           | Not reported | Not reported | Not reported | Not reported | Not reported |
| Hadj Sadek et al. (2011)<br>Morocco [102]        | Not reported               | Not reported                  | Not reported      | Not reported | Not reported | Not reported | Not reported           | Not reported | Not reported | Not reported | Not reported | Not reported |
| Pepperell & Dawborn (1970)<br>Australia [103]    | Not reported               | Not reported                  | Not reported      | Not reported | Not reported | Not reported | Not reported           | Not reported | Not reported | Not reported | Not reported | Not reported |
| Abu-Zaid et al. (2013)<br>Saudi Arabia<br>[104]  | Not reported               | Not reported                  | 1,500 mg/day [24] | Not reported | Not reported | Not reported | Not reported           | Not reported | Not reported | Not reported | Not reported | Not reported |
| Al-Saran & Sabry (2008)<br>Saudi Arabia<br>[105] | Not reported               | Not reported                  | Not reported      | Not reported | Not reported | Not reported | Not reported           | Not reported | Not reported | Not reported | Not reported | Not reported |
| Ackrill et al. (1975)<br>United Kingdom [106]    | Not reported               | Not reported                  | Not reported      | Not reported | Not reported | Not reported | Not reported           | Not reported | Not reported | Not reported | Not reported | Not reported |
| GómezVázquez et al. (2007)<br>Mexico [107]       | 3 g/day (NaCl)<br>(case 2) | 2 g/day potassium<br>(case 2) | Not reported      | Not reported | Not reported | Not reported | 800 mg/day (cases 1,2) | Not reported |

[illegible]

[illegible]



[illegible]

[illegible]

[illegible]



| <b>Daily Amount</b>                                   | <b>Na</b>    | <b>K</b>     | <b>Ca</b>    | <b>Mg</b>    | <b>Fe</b>    | <b>Zn</b>    | <b>P</b>     | <b>I</b>     | <b>Cu</b>    | <b>Se</b>    | <b>Mn</b>    | <b>Mb</b>    |
|-------------------------------------------------------|--------------|--------------|--------------|--------------|--------------|--------------|--------------|--------------|--------------|--------------|--------------|--------------|
| Vellanki & Hou (2019)<br>United States<br>[172]       | Not reported |
| Shahid et al. (2018)<br>United Kingdom & Canada [173] | Not reported |
| Piccoli et al. (2023)<br>Italy [174]                  | Not reported |

Abbreviations: NRV, nutrient reference value; KDOQI, Kidney Disease Outcomes Quality Initiative; Na, sodium; K, potassium; Ca, calcium; Mg, magnesium; Fe, iron; Zn, zinc; P, phosphorous; I, iodine; Cu, copper; Se, selenium; Mn, manganese; Mb, molybdenum; AI, adequate intake; RDI, recommended daily intake; HD, haemodialysis; IBW, ideal body weight; NaCl, sodium chloride; PD, peritoneal dialysis.

**Supplementary Table S6.** Other relevant commentary from the literature regarding pregnant women receiving dialysis.

|                                                 | Dietary Patterns                                                                        | Breastfeeding | Weight                                                                                                                                                                                                                    | Other Recommendations/Comments                                                                                                                                                                                                                                                                                                                                                                                                                                                |
|-------------------------------------------------|-----------------------------------------------------------------------------------------|---------------|---------------------------------------------------------------------------------------------------------------------------------------------------------------------------------------------------------------------------|-------------------------------------------------------------------------------------------------------------------------------------------------------------------------------------------------------------------------------------------------------------------------------------------------------------------------------------------------------------------------------------------------------------------------------------------------------------------------------|
| <i>Consensus Guidelines/Position Papers</i>     |                                                                                         |               |                                                                                                                                                                                                                           |                                                                                                                                                                                                                                                                                                                                                                                                                                                                               |
| de Jong et al. (2022)<br>The Netherlands<br>[3] | Not reported                                                                            | Not reported  | Not reported                                                                                                                                                                                                              | HD: Double dose water-soluble vitamins, folic acid (5 mg/day), oral or parenteral iron (iron carboxymaltose up to 1000 mg or 15 mg/kg/dose, iron isomaltoside up to 1000-2000 mg or 20 mg/kg/dose, iron sucrose up to 62.5-100 mg during dialysis), calcium if insufficient dietary intake (500-1000 mg/day, dose depending on the dietary calcium intake). Use calcium supplementation with caution in advanced CKD and hyperphosphatemia despite adequate dietary measures. |
| Schmidt et al. (2022)<br>Germany [4]            | Habits and economic situation must be considered, and individual needs must be defined. | Not reported  | Dry weight assessed weekly based on ultrasound measurement of inferior vena cava diameter. Weight gain of ~300 g/week from 2nd trimester should be factored in. Fluid management must be adapted to expected weight gain. | Oral/IV iron and vitamin D. Supplementation depends on general and disease-specific recommendations, phosphate binders often paused depending on serum levels (may switch to calcium-containing phosphate binders).                                                                                                                                                                                                                                                           |
| Cabiddu et al. (2015)<br>Italy [5]              | Unrestricted, protein-rich diet.                                                        | Not reported  | Weight gain estimated at 300 g/week in 2nd trimester and 300-500 g/week in 3rd trimester.                                                                                                                                 | Phosphate supplements on long-hour daily HD, water-soluble vitamins, zinc (as required) [184,187-189], oral/IV iron, folate, vitamin B12, vitamin D, and oral magnesium (as required).                                                                                                                                                                                                                                                                                        |
| Wiles et al. (2019)<br>United Kingdom[6]        | Unrestricted diet, rich in protein (HD) [7].                                            | Not reported  | Weight gain 300 g/week in 2nd trimester and 300-500 g/week in 3rd trimester [12].                                                                                                                                         | High-dose folic acid (5 mg/day pre-pregnancy and in 1st trimester), water-soluble vitamins, oral or                                                                                                                                                                                                                                                                                                                                                                           |

| Dietary Patterns                                                                                                             | Breastfeeding                                                                                                            | Weight       | Other Recommendations/Comments                                                                                                                                                                                                                                                                                                                                                                                                                                                                                                     |
|------------------------------------------------------------------------------------------------------------------------------|--------------------------------------------------------------------------------------------------------------------------|--------------|------------------------------------------------------------------------------------------------------------------------------------------------------------------------------------------------------------------------------------------------------------------------------------------------------------------------------------------------------------------------------------------------------------------------------------------------------------------------------------------------------------------------------------|
| parenteral iron, vitamin D, electrolytes (including magnesium), and calcium-phosphate balance monitored every 1-2 weeks [7]. |                                                                                                                          |              |                                                                                                                                                                                                                                                                                                                                                                                                                                                                                                                                    |
| <b>Reviews</b>                                                                                                               |                                                                                                                          |              |                                                                                                                                                                                                                                                                                                                                                                                                                                                                                                                                    |
| Esposito et al. (2020) Italy [8]                                                                                             | Intensive dialysis during pregnancy allows a more liberal diet intake (dietary restrictions not usually required) [190]. | Not reported | Weight gain of 1-1.5 kg in 1st trimester and 0.5 kg/week from 2nd trimester [32].                                                                                                                                                                                                                                                                                                                                                                                                                                                  |
|                                                                                                                              |                                                                                                                          |              | Folic acid (2-5 mg/day), oral/IV iron, vitamin C, thiamine, riboflavin, niacin, vitamin B6, zinc as required, vitamin B12 [10,16,191], and 1,25 OH vitamin D for sHPT or deficiency (1000-2000 IU/day) [16].<br>Hyperphosphatemia can be treated with calcium-based binders and vitamin D analogues, and vitamin A is not recommended (except in countries where vitamin A deficiency is a public health issue) [192].<br>A lower calorie diet is recommended for PD due to calories provided by dialysate glucose absorption [9]. |
| Jungers & Chauveau (1997) France [12]                                                                                        | Adequate calorie and protein supply required [13].                                                                       | Not reported | Not reported                                                                                                                                                                                                                                                                                                                                                                                                                                                                                                                       |
|                                                                                                                              |                                                                                                                          |              | Hydro-soluble vitamins, zinc, iron, folic acid (prevention of anaemia), and oral calcium carbonate (for the prevention of hypocalcaemia; must avoid end-HD hypercalcemia) [13].                                                                                                                                                                                                                                                                                                                                                    |
| Holley & Reddy (2003) United States [14]                                                                                     | Not reported                                                                                                             | Not reported | Weight gain 1 lb/week or 500 g every 10 days.                                                                                                                                                                                                                                                                                                                                                                                                                                                                                      |
|                                                                                                                              |                                                                                                                          |              | Folate (1mg/day), water-soluble vitamins, and maintenance IV iron.                                                                                                                                                                                                                                                                                                                                                                                                                                                                 |
| Shemin (2003) United States [16]                                                                                             | Not reported                                                                                                             | Not reported | Dry weight increase 0.5 kg/ week in 2nd/3rd trimesters [151].<br>Establishing a dry weight is challenging during pregnancy because a steady                                                                                                                                                                                                                                                                                                                                                                                        |
|                                                                                                                              |                                                                                                                          |              | Oral potassium/phosphate if hypokalaemia/hypophosphataemia develop, phosphate binders should stop, folate (2.0 mg/day), and IV iron [193,194]. Hyperglycaemia may                                                                                                                                                                                                                                                                                                                                                                  |

| Dietary Patterns                                            | Breastfeeding                                                                                       | Weight                                                                                                                                                       | Other Recommendations/Comments                                                                                                                                                                                                                                                           |
|-------------------------------------------------------------|-----------------------------------------------------------------------------------------------------|--------------------------------------------------------------------------------------------------------------------------------------------------------------|------------------------------------------------------------------------------------------------------------------------------------------------------------------------------------------------------------------------------------------------------------------------------------------|
|                                                             |                                                                                                     | increase in weight of 11-16 kg is expected.                                                                                                                  | develop as a result of large dextrose loads from PD solutions combined with the anti-insulin effect of pregnancy.                                                                                                                                                                        |
| Díaz et al. (2016)<br>Cuba [17]                             | Not reported                                                                                        | Not reported                                                                                                                                                 | Folic acid (1 mg/day), weekly iron, water-soluble vitamins (C, thiamine, riboflavin, niacin, B6) [154,195], oral calcium carbonate (not exceeding 1.5 g/day), and 1,25 dihydroxy vitamin D.                                                                                              |
| Alkhunaizi et al. (2015)<br>Canada [18]                     | Diet can be liberalised to ensure adequate caloric and protein intake.                              | Breastfeed as desired, but caution should be exercised against over aggressive ultrafiltration and dehydration which can hamper milk production.             | Not reported                                                                                                                                                                                                                                                                             |
| Nadeau-Fredette et al. (2013)<br>Canada [19]                | Diet and caloric intake need not be limited during pregnancy, especially during intensive HD [117]. | Not reported                                                                                                                                                 | 1st trimester: Weight gain minimal.<br>2nd/3rd trimesters: Weight gain of 0.5 kg/week in normal weight women [196].<br>Ideal weight gain during pregnancy ranges from 25-35 lb for women with a normal pre-conception BMI.                                                               |
| Hladunewich & Schatell (2016)<br>Canada & United States [7] | Typically no dietary restrictions required. Ensure adequate caloric and protein intake.             | Women undergoing dialysis can breastfeed as desired, but overly aggressive ultrafiltration and dehydration can hamper milk production and should be avoided. | Not reported                                                                                                                                                                                                                                                                             |
|                                                             |                                                                                                     |                                                                                                                                                              | Folic acid/day (5 mg/day), renal multivitamins (water-soluble), magnesium (as required), phosphate (Fleet® enema can be added to the dialysate bath if patient is unable to maintain adequate oral intake), iron sucrose (oral/IV), and calcium-based binders and vitamin D analogues as |

|                                                   | Dietary Patterns                                                                                                                                                                                                    | Breastfeeding                                                                                                                                                                                                                                                                                                                                                                                                                         | Weight                                                                                                                                                                            | Other Recommendations/Comments                                                                                                                                                                                                                                                                                                                                                                                                         |
|---------------------------------------------------|---------------------------------------------------------------------------------------------------------------------------------------------------------------------------------------------------------------------|---------------------------------------------------------------------------------------------------------------------------------------------------------------------------------------------------------------------------------------------------------------------------------------------------------------------------------------------------------------------------------------------------------------------------------------|-----------------------------------------------------------------------------------------------------------------------------------------------------------------------------------|----------------------------------------------------------------------------------------------------------------------------------------------------------------------------------------------------------------------------------------------------------------------------------------------------------------------------------------------------------------------------------------------------------------------------------------|
|                                                   |                                                                                                                                                                                                                     |                                                                                                                                                                                                                                                                                                                                                                                                                                       |                                                                                                                                                                                   | necessary. A dietitian should monitor the patient's diet throughout pregnancy.                                                                                                                                                                                                                                                                                                                                                         |
| Reynolds & Herrera (2020)<br>United States [21]   | Not reported                                                                                                                                                                                                        | Breastfeeding is safe and recommended for most women with CKD, however all medications must be reviewed for lactation safety.                                                                                                                                                                                                                                                                                                         | Expect weight gain of ~0.3 kg/week as pregnancy progresses, with careful monitoring of ultrafiltration to avoid hypotension.                                                      | Double-dose water-soluble vitamins, folic acid (5 mg/day) [29], and IV iron [199].                                                                                                                                                                                                                                                                                                                                                     |
| Hou & Firanek (1998)<br>United States [22]        | Protein restriction can be liberalised once dialysis has started so that maternal and fetal nutrition are not compromised.                                                                                          | Not reported                                                                                                                                                                                                                                                                                                                                                                                                                          | Not reported                                                                                                                                                                      | IV iron in small doses (100 mg/dose) to avoid acute toxicity in the foetus.<br>Adjustment of the doses of oral or parenteral vitamin D should be made only to maintain normal calcium and phosphorus levels.                                                                                                                                                                                                                           |
| Brookhyser & Wiggins (1998)<br>United States [23] | Liberal diet due to intensive dialysis. Potassium is also liberalised with frequent dialysis but ongoing monitoring of serum levels and concurrent adjustments in potassium content of the dialysate may be needed. | Breastfeeding is possible for dialysis patients; however breastmilk quality is questionable. It is recommended these women supplement their breastmilk feedings with formula to ensure all infant nutrient needs are met [200]. The urea content of breastmilk may be higher in renal patients which can cause dehydration in infants [201]. Therefore adequate water should be given with breastmilk feedings to prevent this issue. | Aim for 1-2 kg interdialytic weight gain. Appropriate dry weight gain be encouraged for the specific trimester of pregnancy [202]. Weekly dry weight assessments are recommended. | Zinc (15 mg/day), carnitine (unknown, possibly 330 g/day), ferrous sulfate (325 mg 3x/day, iron) [203], IV iron, oral active vitamin D if serum levels are low, and no vitamin A/E supplementation.<br><br>Indications for enteral nutrition: 1st trimester decline in albumin of >1 g/dL, weight loss and low pre-pregnancy weight for height, and/or hyperemesis gravidarum non-responsive to nutrition counselling/supplementation. |
|                                                   |                                                                                                                                                                                                                     |                                                                                                                                                                                                                                                                                                                                                                                                                                       |                                                                                                                                                                                   | And in the last half of pregnancy, in addition to the above risks, if overall weight gain is <6 kg or <0.25-0.5 kg/week, and non-responsive to nutritional counselling and nutritional supplementation, the patient should take                                                                                                                                                                                                        |

| Dietary Patterns | Breastfeeding | Weight | Other Recommendations/Comments                                                                                                                                                                                                                                                                                                                                                                                                                                                                                                                                                                                                                                                                                                                                                                                                                                                                                                                                                                                                                                                                                                                                                                                                                                                                                                                                |
|------------------|---------------|--------|---------------------------------------------------------------------------------------------------------------------------------------------------------------------------------------------------------------------------------------------------------------------------------------------------------------------------------------------------------------------------------------------------------------------------------------------------------------------------------------------------------------------------------------------------------------------------------------------------------------------------------------------------------------------------------------------------------------------------------------------------------------------------------------------------------------------------------------------------------------------------------------------------------------------------------------------------------------------------------------------------------------------------------------------------------------------------------------------------------------------------------------------------------------------------------------------------------------------------------------------------------------------------------------------------------------------------------------------------------------|
|                  |               |        | <p>nothing by mouth until the tube feeding tolerance is established.</p> <p>Commencement of enteral nutrition:<br/>Initial infusion should start at no greater than 30 mL/h for 24 hours<br/>advancing gradually until the desired calorie and protein level are achieved.<br/>Oral feedings can then be initiated gradually after tolerance to the tube feedings is established. A cycling of the feeding over several hours per day may be better tolerated than a continuous drip 24 hours per day. Tube feedings should not run 1 to 2 hours before treatment nor during treatment [204-206]. Indications for parenteral nutrition: TPN should only be considered if an attempt at enteral nutrition has failed, or the patient has such severe gastrointestinal symptoms that enteral nutrition is not possible.</p> <p>Commencing parenteral nutrition:<br/>Glucose infusion should be limited to 5 mg/kg/min and amino acid solutions should have a balanced profile of essential and non-essential amino acids. The recommended profile for nutrients is 40%-60% carbohydrate/20% amino acids/20%-40% fats. A water-soluble vitamin and folic acid should be provided [204].</p> <p>Indications for IDPN: A desire to avoid invasive nutritional support, a patient who cannot tolerate high- volume loads between treatments, a home environment</p> |

| Dietary Patterns                                             | Breastfeeding                                                                                     | Weight       | Other Recommendations/Comments                                                                                                                                                                                                                                                                                                                                                                                                                                                                                                                                   |
|--------------------------------------------------------------|---------------------------------------------------------------------------------------------------|--------------|------------------------------------------------------------------------------------------------------------------------------------------------------------------------------------------------------------------------------------------------------------------------------------------------------------------------------------------------------------------------------------------------------------------------------------------------------------------------------------------------------------------------------------------------------------------|
|                                                              |                                                                                                   |              | <p>where TPN or tube feeding would be hazardous, permanent gastrointestinal dysfunction, and/or patients who do not require that 100% of their needs be met parenterally. Diabetes: Strict adherence to glucose monitoring schedules, insulin adjustment, and diet modification are recommended [207]. Regular meals and dialysis times so that meal timing and blood sugar testing/insulin timing can remain constant day to day is also recommended [133].</p>                                                                                                 |
| Reddy & Holley (2007)<br>United States [24]                  | Higher protein intake is recommended. Frequent dialysis allows for liberal diet and fluid intake. | Not reported | <p>Increase estimated ideal weight by ~0.5 kg/week. Avoid maternal volume depletion.</p> <p>IV iron (62.5 mg-100 mg at a time, depending on the preparation) [11,22,120], measure and supplement 25-OH vitamin D every trimester, vitamin C, thiamine, riboflavin, niacin, vitamin B6, folate, and oral phosphorus supplements for hypophosphataemia. Phosphate binders are often discontinued.</p>                                                                                                                                                              |
| Oliverio & Hladunewich (2020)<br>United States & Canada [25] | With increased HD most nutritional restrictions can be liberalised.                               | Not reported | <p>Weight gain is minimal in the 1st trimester, followed by 0.3-0.5 kg/week in the 2nd/3rd trimesters. Total weight gain of 11.5-16 kg (25-35 lbs) is recommended for women with a normal pre-pregnancy BMI [208].</p> <p>Phosphorous, iron sucrose, and high-dose folic acid (5 mg/day) supplementation. Calcium-based binders and vitamin D analogues (safe in pregnancy as long as maternal calcium levels are maintained in the normal range. However, Sevelamer is associated with reduced or irregular ossification of foetal bones in animal models).</p> |
| Reyes-López et al. (2020)<br>Mexico & Italy [9]              | For adults with CKD and diabetes, 3 meals and 2-3 snacks/day are preferred.                       | Not reported | <p>1st trimester: Weight gain of 1-1.5 kg.</p> <p>IV vitamin D analogues (once 25 OH-D reaches its optimal levels a vitamin D-containing multivitamin should be</p>                                                                                                                                                                                                                                                                                                                                                                                              |

|                                                   | Dietary Patterns                                                                                                                                                                                                                    | Breastfeeding                                                                                                                                                                                                                                                        | Weight                                                                                                                                                                                                        | Other Recommendations/Comments                                                                                                                                                                                                                                                                                                                                                             |
|---------------------------------------------------|-------------------------------------------------------------------------------------------------------------------------------------------------------------------------------------------------------------------------------------|----------------------------------------------------------------------------------------------------------------------------------------------------------------------------------------------------------------------------------------------------------------------|---------------------------------------------------------------------------------------------------------------------------------------------------------------------------------------------------------------|--------------------------------------------------------------------------------------------------------------------------------------------------------------------------------------------------------------------------------------------------------------------------------------------------------------------------------------------------------------------------------------------|
|                                                   | Promoting healthy CHO consumption (low-GI foods and/or high-fiber foods) and avoiding added sugars and processed foods is also recommended [209] [210]. At least 50% of dietary protein should be of high biological value [27,28]. |                                                                                                                                                                                                                                                                      | 2nd/3rd trimesters: Weight gain of 0.5 kg/week [51].<br>Total expected pregnancy weight gain is 5.2-12 kg [95] [123] [182].<br>Interdialytic weight gain has been suggested to be 4-4.5% of dry weight [211]. | continued) [97], oral/IV iron (20-30 mg/day of IV elemental iron (iron gluconate) until transferrin saturation reaches 30% and serum ferritin 200-300 ng/mL) [32], 1-5 mg folic acid/day (with higher doses for pregnant women receiving HD) [18,97].<br>Due to more frequent dialysis sessions phosphorus restriction/use of phosphate binders may not be needed in CKD pregnancies [18]. |
| Tangren et al. (2018) United States & Canada [29] | Unrestricted diet (including liberalised dietary phosphate) due to intensified HD.                                                                                                                                                  | There are no known contraindications to breastfeeding in women with ESRD on HD. However medication review is necessary to ensure that all medications are compatible with breastfeeding (iron can be continued). Avoid volume depletion to facilitate breastfeeding. | Dry weight increases up to 0.5 kg/week during 2nd/3rd trimesters. Volume management during pregnancy is challenging because dry weights are difficult to ascertain.                                           | Folic acid (5 mg/day), double dose of water-soluble vitamins, oral supplementation of phosphate to maintain serum phosphorus levels as necessary, IV iron sucrose, and vitamin D analogues as required (considered safe in pregnancy).                                                                                                                                                     |
| Vecchio et al. (2021) Italy [31]                  | Not reported                                                                                                                                                                                                                        | Not reported                                                                                                                                                                                                                                                         | Control interdialytic weight gain.                                                                                                                                                                            | Oral iron/folic acid, electrolytes, vitamin C, thiamine, riboflavin, niacin, vitamin B, vitamin D (as necessary), and dosage adjustments of potassium, sodium, and calcium [11,16].                                                                                                                                                                                                        |
| Kapoor et al. (2009) United Kingdom [33]          | Fluid intake should be determined individually. Take into account native urine output and the type/ frequency of RRT the woman is receiving.                                                                                        | Not reported                                                                                                                                                                                                                                                         | Expect a weight gain of 0.5 kg/week.                                                                                                                                                                          | Vitamin D (measure levels every trimester and supplement if low), folate (5 mg/day), vitamin C, thiamine, riboflavin, niacin, vitamin B6, and IV iron. Most people on dialysis tend to have high phosphate levels but if the levels are low oral phosphate supplements can be used.                                                                                                        |



|                                          | <b>Dietary Patterns</b>                                                                                        | <b>Breastfeeding</b> | <b>Weight</b>                                                                                                                                                                                                                | <b>Other Recommendations/Comments</b>                                                                                                                                                                                                                                                                                                                                                                                                                                                                                                                                                                                                                                                                                                                                                                                                               |
|------------------------------------------|----------------------------------------------------------------------------------------------------------------|----------------------|------------------------------------------------------------------------------------------------------------------------------------------------------------------------------------------------------------------------------|-----------------------------------------------------------------------------------------------------------------------------------------------------------------------------------------------------------------------------------------------------------------------------------------------------------------------------------------------------------------------------------------------------------------------------------------------------------------------------------------------------------------------------------------------------------------------------------------------------------------------------------------------------------------------------------------------------------------------------------------------------------------------------------------------------------------------------------------------------|
| Castellano et al. (2011)<br>Italy [34]   | Not reported                                                                                                   | Not reported         | Not reported                                                                                                                                                                                                                 | There are some case reports about intradialytic hyperalimentation as adjuvant support in pregnant HD patients [88].                                                                                                                                                                                                                                                                                                                                                                                                                                                                                                                                                                                                                                                                                                                                 |
| Hladunewich et al. (2011)<br>Canada [36] | An unrestricted diet is recommended. Caloric intake requirements increase as pregnancy progresses.             | Not reported         | 1st trimester: Expected weight gain is minimal.<br>2nd/3rd trimesters: Dry weight can be expected to increase by up to 0.5 kg/week.<br>Healthy maternal weight gain in a woman with a normal BMI should range from 25-35 lb. | Double dose multivitamins, folic acid (5 mg/day), and oral/IV iron.                                                                                                                                                                                                                                                                                                                                                                                                                                                                                                                                                                                                                                                                                                                                                                                 |
| Stover (2010) United States [37]         | Liberal diet for sodium, potassium, and phosphorus content due to more solute removal with increased dialysis. | Not reported         | Dry weight gain of ~1.6 kg in the 1st trimester and 0.3-0.5 kg/week in the 2nd/3rd trimesters is to be expected [179].                                                                                                       | IV iron (no more than 62.5 mg to 100 mg at any one time) [24], folic acid/day (3-4 mg) [212] (some renal vitamins with >1 mg of folic acid may need to be given or doubled to meet this goal, or a standard renal vitamin could be doubled and additional folic acid provided), nutritional vitamin D as required (ergocalciferol or cholecalciferol), Prenatal vitamins every other day alternating with a renal vitamin (to avoid vitamin A toxicity), and zinc (15 mg/day) [10,89]. Phosphate binders may not be needed (if required calcium-containing binders are usually given due to increased calcium needs of the developing foetus). If calcium carbonate is needed only for calcium supplementation, it should be given apart from meals for better calcium absorption [89] [53]. There are mixed recommendations for the use of vitamin |

|                                                | Dietary Patterns                                                                                                                                                    | Breastfeeding                                                                                                                                                                                                                                                                                                                                                                                                                     | Weight                                                                                                                                                                                      | Other Recommendations/Comments                                                                                                                                                                                                                                                                                                                   |
|------------------------------------------------|---------------------------------------------------------------------------------------------------------------------------------------------------------------------|-----------------------------------------------------------------------------------------------------------------------------------------------------------------------------------------------------------------------------------------------------------------------------------------------------------------------------------------------------------------------------------------------------------------------------------|---------------------------------------------------------------------------------------------------------------------------------------------------------------------------------------------|--------------------------------------------------------------------------------------------------------------------------------------------------------------------------------------------------------------------------------------------------------------------------------------------------------------------------------------------------|
|                                                |                                                                                                                                                                     |                                                                                                                                                                                                                                                                                                                                                                                                                                   |                                                                                                                                                                                             | D analogues to suppress PTH during pregnancy. Use oral protein or protein/energy supplements if increased needs cannot be met.                                                                                                                                                                                                                   |
| Hall & Brunskill (2010)<br>United Kingdom [38] | Not reported                                                                                                                                                        | Not reported                                                                                                                                                                                                                                                                                                                                                                                                                      | Dry weight will increase by ~1.5 kg in the 1st trimester, then 0.5 kg/week until delivery. These changes should be supervised by careful clinical evaluation of the patient's fluid status. | IV iron                                                                                                                                                                                                                                                                                                                                          |
| Kothari et al. (2019)<br>United States [39]    | Most dietary restrictions are relaxed due to intensified dialysis. Nutritious and well-balanced meals targeting adequate calorie and protein intake is recommended. | The benefit of breastfeeding supersedes any associated risk. Significant variations in breast milk composition between pre- and post HD samples suggests that breastfeeding after a dialysis session is preferable to breastfeeding prior to a dialysis session. Discard milk pumped immediately prior to dialysis [41]. Aggressive ultra-filtration may reduce milk supply. There are no available data on breast-feeding in PD. | 1st trimester: Total ~1 kg weight gain.<br>2nd/3rd trimesters: Weight gain of ~0.5 kg/week.                                                                                                 | IV iron sucrose if deficient [29], vitamin B12, folate, phosphorus, vitamin C, thiamine, riboflavin, niacin, vitamin B6, calcium-based phosphorus binders for elevated phosphorous levels, calcitriol to address vitamin D deficiency, and calcium (1.5-2 g/day).<br><br>Post-dialysis supplementation is recommended for all prenatal vitamins. |
| Lim & Wah (2018)<br>Malaysia [41]              | Not reported                                                                                                                                                        | Not reported                                                                                                                                                                                                                                                                                                                                                                                                                      | Weight gain of 0.3-0.5 kg/week during 2nd/3rd trimesters. Dry weight must be reviewed continuously.                                                                                         | Iron (1-15 mg/day), folic acid (1 mg/day) [5], vitamin C, thiamine, riboflavin, niacin, vitamin B6, calcium, vitamin D3, water-soluble vitamins, and minerals.                                                                                                                                                                                   |
| Vázquez-Rodríguez (2010) Mexico [57]           | Not reported                                                                                                                                                        | Not reported                                                                                                                                                                                                                                                                                                                                                                                                                      | Aim for $\leq 1$ kg interdialytic weight gain.                                                                                                                                              | Nil                                                                                                                                                                                                                                                                                                                                              |

|                                                         | <b>Dietary Patterns</b>                  | <b>Breastfeeding</b>                                                           | <b>Weight</b>                                                                                                                                                                                                                                                                                                                                                                                                                    | <b>Other Recommendations/Comments</b>                                                                                                                                                                                                                                                                                                                                                                                                                                                                                                                                              |
|---------------------------------------------------------|------------------------------------------|--------------------------------------------------------------------------------|----------------------------------------------------------------------------------------------------------------------------------------------------------------------------------------------------------------------------------------------------------------------------------------------------------------------------------------------------------------------------------------------------------------------------------|------------------------------------------------------------------------------------------------------------------------------------------------------------------------------------------------------------------------------------------------------------------------------------------------------------------------------------------------------------------------------------------------------------------------------------------------------------------------------------------------------------------------------------------------------------------------------------|
| Hou (2004)<br>United States [45]                        | Unlimited protein intake is recommended. | Not reported                                                                   | 1st trimester: It may become difficult to dialyse the patient down to her pre-pregnancy dry weight, but the change should be only 0.9 to 2.3 kg.<br>2nd/3rd trimesters: Weight gain of 0.3-0.5 kg/week is expected (depending on pre-pregnancy BMI). Recommended total weight gain for women who become pregnant at their ideal body weight is 11.5 to 16 kg [134]. Only 1.6 kg of this weight gain occurs in the 1st trimester. | Doses of water-soluble vitamins should be increased 3-4 fold (including folic acid) [134], and IV iron (ferric gluconate).                                                                                                                                                                                                                                                                                                                                                                                                                                                         |
| Onder et al. (2016)<br>United States [46]               | Not reported                             | Not reported                                                                   | Weight gain of 1-1.5 kg in the 1st trimester and 0.45-1 kg/week in last trimester.                                                                                                                                                                                                                                                                                                                                               | Oral iron supplementation is usually inadequate (IV iron can be given safely), folic acid (5 mg/day), vitamin C (500 mg/day), thiamine, riboflavin, niacin, vitamin B6, 25-OH vitamin D should be measured each trimester and supplemented levels are <30 ng/mL. Frequent HD can lead to hypophosphatemia sometimes requiring oral phosphorus supplements or increased dietary intake (adding phosphorus to dialysate as needed to keep may also be useful). Supplemental 1,25-dihydroxy vitamin D may be continued for the management of sHPT and/or for routine repletion [213]. |
| Wiles & Oliveira (2019)<br>United Kingdom & Brazil [50] | Not reported                             | Breastfeeding should be encouraged and supported. Prescribed medication should | Weight gain of 300-500 g/week during 2nd/3rd trimesters is expected, and should be                                                                                                                                                                                                                                                                                                                                               | Oral magnesium supplementation as required, IV iron sucrose/iron                                                                                                                                                                                                                                                                                                                                                                                                                                                                                                                   |

|                                        | Dietary Patterns                                                                                     | Breastfeeding                                                                                  | Weight                                                                                                             | Other Recommendations/Comments                                                                                                                                                                                                                                                                                                                                                                                                                                                                                                                                                                                                    |
|----------------------------------------|------------------------------------------------------------------------------------------------------|------------------------------------------------------------------------------------------------|--------------------------------------------------------------------------------------------------------------------|-----------------------------------------------------------------------------------------------------------------------------------------------------------------------------------------------------------------------------------------------------------------------------------------------------------------------------------------------------------------------------------------------------------------------------------------------------------------------------------------------------------------------------------------------------------------------------------------------------------------------------------|
|                                        |                                                                                                      | be compatible with lactation, and dialysis regimens should accommodate breastfeeding [5] [29]. | accommodated appropriately in dialysis weight targets [5] [29].                                                    | dextran/ferric carboxymaltose [214], correct vitamin D deficiency (e.g. Via use of activated analogues), and folate/day (5 mg/day, starting ≥12 weeks prior to conception for foetal neural tube formation). Phosphate binders are often discontinued but if indicated calcium is safe for use in pregnancy although Sevelamer is usually avoided due to animal evidence of impaired ossification of the foetal skeleton at supra-therapeutic doses [215].<br>Diabetes: Avoid problematic hypoglycaemia and consider weight reduction for increased BMI.                                                                          |
| Furaz-Czerpak et al. (2012) Spain [51] | Increased potassium and phosphorous uptake in order to maintain adequate levels is recommended [11]. | Not reported                                                                                   | 1st trimester: Minimum 1-1.5 kg weight gain.<br>2nd/3rd trimesters: Weight should increase by 0.45-1 kg/week [15]. | Avoid hypocalcaemia and hyperphosphataemia (if necessary, use calcium chelating agents, but avoid post-dialysis hypercalcaemia) [11,12].<br><br>Iron (IV > oral) [24], folic acid (1 mg/day starting from 1st trimester) [11], water-soluble vitamins [15], dialysable supplements (vitamin C, thiamine, riboflavin, niacin, vitamin B6) [16], calcium carbonate (1-2 g/day) [24], and oral supplements for hypophosphatemia. 25-OH vitamin D levels should be measured every trimester and supplemented if low [11]. 1,25-dihydroxyvitamin D can be used for pHPT and deficiency, but dosage adjustments must be based on weekly |

| Dietary Patterns                  | Breastfeeding                                                                                      | Weight       | Other Recommendations/Comments                                                                                                                                                                                                                                                                                                                                                                                                                                                                                                 |
|-----------------------------------|----------------------------------------------------------------------------------------------------|--------------|--------------------------------------------------------------------------------------------------------------------------------------------------------------------------------------------------------------------------------------------------------------------------------------------------------------------------------------------------------------------------------------------------------------------------------------------------------------------------------------------------------------------------------|
|                                   |                                                                                                    |              | calcium and phosphorous measurements (calciferol does not appear to be toxic at reasonable doses) [24]. Sevelamer, lanthanum carbonate, aluminium hydroxide, cinacalcet, and paricalcitol have not been tested or established for use during pregnancy/lactation [216,217].                                                                                                                                                                                                                                                    |
| Singh & Pradeep (2012) India [52] | Fluid intake is determined individually depending upon the type of RRT the woman is receiving.     | Not reported | After the 1st trimester dry weight should be increased by approximately 1 lb/week (400 g/week). A weight gain of 0.5 kg/week can be expected.                                                                                                                                                                                                                                                                                                                                                                                  |
| Stover (2007) United States [53]  | Diet can be liberalised for sodium, potassium, and phosphorus content because of intense dialysis. | Not reported | Folate (5 mg/day), calcium, oral magnesium [218], water-soluble vitamins (vitamin C, thiamine, riboflavin, niacin, vitamin B6), zinc, and iron (oral/parenteral). Due to placental 25- hydroxy vitamin D3 conversion, decreased supplemental vitamin D is required and should be guided by levels of vitamin D, PTH, calcium and phosphorus.                                                                                                                                                                                   |
|                                   |                                                                                                    |              | Double dose of a standard renal vitamin or one of the newer renal vitamins with greater >1 mg of folic acid, and minimum 2 mg folic acid/day [16]. IV vitamin D analogues to suppress PTH, maintain normal serum calcium levels, and treat deficiency. Oral iron (PD) and IV iron dextran/gluconate/sucrose (HD/PD) [182,186], zinc, and protein or calorie/protein supplements as required. Supplemental vitamin A is not routinely given due to risk of toxicity [10]. Phosphate binders may not be necessary with intensive |

|                                                   | Dietary Patterns                                             | Breastfeeding | Weight                                                                                                                                      | Other Recommendations/Comments                                                                                                                                                                                                                                                                                                                                                                                                                                                                                                                                                                                                                                                     |
|---------------------------------------------------|--------------------------------------------------------------|---------------|---------------------------------------------------------------------------------------------------------------------------------------------|------------------------------------------------------------------------------------------------------------------------------------------------------------------------------------------------------------------------------------------------------------------------------------------------------------------------------------------------------------------------------------------------------------------------------------------------------------------------------------------------------------------------------------------------------------------------------------------------------------------------------------------------------------------------------------|
|                                                   |                                                              |               |                                                                                                                                             | dialysis. Calcium carbonate may be used apart from meals for calcium supplementation if necessary.                                                                                                                                                                                                                                                                                                                                                                                                                                                                                                                                                                                 |
| Shehaj & Kazancıoglu (2023) Turkey & Albania [55] | Not reported                                                 | Not reported  | Increase in dry weight of 0.5 kg/week during 2nd/3rd trimesters is expected [41].                                                           | Calcium (1.5-2 g/day, with caution as hypercalcemia may lead to foetal hypoparathyroidism) [39], iron (1-15 mg/day), folic acid (1 mg/day) [5], <1.5 µg calcitriol/week [219], and oral magnesium supplementation [187,220].                                                                                                                                                                                                                                                                                                                                                                                                                                                       |
| Vázquez-Rodríguez (2010) Mexico [44]              | A balanced diet is recommended.                              | Not reported  | Not reported                                                                                                                                | Parenteral iron, oral iron (100-300 mg/24 hours), folic acid (1 mg/day), water-soluble vitamins [11], and vitamin D (dose guided according to serum vitamin D levels, PTH, calcium, and phosphorus in the maternal blood) [11,15].                                                                                                                                                                                                                                                                                                                                                                                                                                                 |
| Porter (2009) United States [58]                  | Sodium, potassium, and phosphorus intake can be liberalised. | Not reported  | Weight gain of 2 kg in 1st trimester and 0.5 kg/week in 2nd/3rd trimesters for women who begin pregnancy with a normal BMI can be expected. | IV iron (in small doses of 100 mg or less to avoid deposition in the foetus), additional oral folate (4 mg/day, ideally prior to pregnancy in order to reduce the risk of neural tube defects in the foetus), calcium (1000 mg/day), and double doses of renal vitamins (regular prenatal vitamins contain doses of vitamin A that are in excess of that required by dialysis patients). In some cases, phosphorus binders may need to be stopped due to hypophosphatemia from more frequent dialysis. Assessment of maternal serum 25-OH vitamin D levels should be done, with supplementation given if this is low since the placenta can provide conversion to the active form. |

|                                               | Dietary Patterns                      | Breastfeeding | Weight                                                                                                                      | Other Recommendations/Comments                                                                                                                                                                                                                                                                                                                                                                                                        |
|-----------------------------------------------|---------------------------------------|---------------|-----------------------------------------------------------------------------------------------------------------------------|---------------------------------------------------------------------------------------------------------------------------------------------------------------------------------------------------------------------------------------------------------------------------------------------------------------------------------------------------------------------------------------------------------------------------------------|
| Hou & Elahi (2005)<br>United States [59]      | Not reported                          | Not reported  | Dry weight can be determined with careful physical exam and a trial of fluid removal.                                       | Oral or IV 1,25-dihydroxy-vitamin D, ferric gluconate, increased dose of water-soluble vitamins, and increased potassium supplementation. Many patients no longer need phosphate binders and must be monitored for hypophosphataemia. Four-fold increase in dose of folic acid is also suggested. Severely decreased oral intake may warrant parenteral nutrition.                                                                    |
| Nikolskaya & Prokopenko (2014)<br>Russia [60] | Not reported                          | Not reported  | 1st trimester: Total weight gain should be only 1-1.5 kg.<br>2nd/3rd trimesters: Weight gain of 300-500 g/week is expected. | IV iron (to treat anaemia), folic acid (1 mg/day starting from the 1st trimester) [51], vitamin B12, and water-soluble vitamins (vitamin C, thiamine, riboflavin; the dose of which should be increased by two times) [16].                                                                                                                                                                                                           |
| Hui & Hladunewich (2019)<br>Canada [62]       | Not reported                          | Not reported  | Not reported                                                                                                                | IV iron, water-soluble vitamins (double usual daily dose), and minerals. Supplement folic acid (minimum of 5 mg in the 1st trimester) and calcium (1.5-2 g/day).                                                                                                                                                                                                                                                                      |
| Hou (1999)<br>United States [11]              | Potassium intake should be increased. | Not reported  | With daily dialysis interdialytic weight gains are modest and the risk for hypotension with fluid removal is decreased.     | The safety of IV iron has not been established but it has been widely used [193]. If a patient is dialysed on a lower calcium bath, enough calcium should be absorbed from phosphate binders if 2 g/day of calcium is taken. 1,25 dihydroxy vitamin D preparations (oral or IV) are usually continued. Decreased oral intake has sometimes been severe enough to require parenteral nutrition either during HD or continuously [221]. |

| Dietary Patterns                             | Breastfeeding                                                                                 | Weight       | Other Recommendations/Comments                                                                                                                                                                                                                                          |
|----------------------------------------------|-----------------------------------------------------------------------------------------------|--------------|-------------------------------------------------------------------------------------------------------------------------------------------------------------------------------------------------------------------------------------------------------------------------|
|                                              |                                                                                               |              | Potassium supplements (as required), increased dose of water-soluble vitamins (particularly folic acid), and carnitine (330 mg/day) are recommended. Vitamins A and E do not require supplementation.                                                                   |
| Davison (1991)<br>United Kingdom<br>[63]     | Despite frequent dialysis an uncontrolled dietary intake should be discouraged.               | Not reported | Avoid rapid fluctuations in intravascular volume by limiting interdialytic weight gain to ~1 kg until late in pregnancy.                                                                                                                                                |
|                                              |                                                                                               |              | Dialysable vitamins are recommended. Vitamin D supplements can be difficult to judge in patients who have had a parathyroidectomy. The use of parenteral nutrition has also been advocated [128]. With CAPD intraperitoneal insulin can facilitate diabetic management. |
| Hou (1987)<br>United States [64]             | Largely unrestricted, high-protein diet is recommended.                                       | Not reported | Not reported                                                                                                                                                                                                                                                            |
| Oliverio et al. (2021)<br>United States [65] | Liberalise phosphorus intake with intensified HD.                                             | Not reported | Anticipate weight gain of 0.3-0.5 kg/week in the 2nd/3rd trimesters.                                                                                                                                                                                                    |
| Ramin et al. (2006)<br>United States [66]    | Not reported                                                                                  | Not reported | Expect weight gain of 1 lb/week [48].                                                                                                                                                                                                                                   |
| Chan et al. (1998)<br>Canada [67]            | Not reported                                                                                  | Not reported | Not reported                                                                                                                                                                                                                                                            |
|                                              |                                                                                               |              | Supplementation in pregnant HD patients with albumin or amino acid infusions during dialysis [222-224] has increased body weight and albumin levels in malnourished chronic dialysis patients. Water-soluble vitamins [225] and zinc are recommended.                   |
| Giannattasio et al. (2017)<br>Italy [68]     | An unrestricted diet is recommended. At least 50% protein should be of high biological value. | Not reported | Weight gain of 300 g/week in the 2nd trimester and 300-500 g/week in the 3rd                                                                                                                                                                                            |
|                                              |                                                                                               |              | Iron (as early as possible even in the presence of only mild deficiency) [18]. IV iron in small doses in refractory cases (80-90% can be                                                                                                                                |



|                                              | Dietary Patterns                                                                                                                                                                                                                                                                                                      | Breastfeeding | Weight                                                                                                                     | Other Recommendations/Comments                                                                                                                                                                                                                                                                                                                                                                                                                |
|----------------------------------------------|-----------------------------------------------------------------------------------------------------------------------------------------------------------------------------------------------------------------------------------------------------------------------------------------------------------------------|---------------|----------------------------------------------------------------------------------------------------------------------------|-----------------------------------------------------------------------------------------------------------------------------------------------------------------------------------------------------------------------------------------------------------------------------------------------------------------------------------------------------------------------------------------------------------------------------------------------|
|                                              |                                                                                                                                                                                                                                                                                                                       |               | trimester can be expected [5,18,23,226,227]. Weight gain must be carefully monitored to avoid dehydration and hypotension. | deposited in foetus) [5,24]. Vitamin D (guided by levels of mono- and di-hydroxylated vitamin D, serum calcium, and phosphate levels), and calcium-based phosphorus binders. There is little evidence on the use of cinacalcet and vitamin D analogues. IDPN can be considered (if necessary) during pregnancy or lactation [226].                                                                                                            |
| Hou & Grossman (1990)<br>United States [69]  | Not reported                                                                                                                                                                                                                                                                                                          | Not reported  | Not reported                                                                                                               | Measure levels of 1,25(OH)2D3 and supplement where the levels are below normal for pregnancy. Serum calcium levels need to be monitored to avoid hypercalcemia. Monthly serum iron, total iron binding capacity, and ferritin levels should be measured, and iron supplementation given as needed. Folate (1 mg/day) is also recommended. Women who may not be taking prescribed folate supplements should be educated about their necessity. |
| Grossman et al. (1993)<br>United States [70] | Empirically, the authors' approach has been to lift dietary protein restrictions and increase dialysis time to prevent increased azotemia, the dietary protein prescribed is then the same as for a healthy woman. BUN is monitored weekly but dietary protein is restricted only if azotemia cannot be controlled by | Not reported  | Optimal weight gain for a normal-weight mother during pregnancy is 11.3-16 kg (25-35 lb) [228].                            | Water-soluble vitamins (the usual dose for dialysis patients can be doubled when dialysis time is doubled, but when there is no increase in dialysis time the same increases used for the normal pregnant woman should be used) [229]. Vitamin A is not recommended (a reasonable approach would be to measure retinol esters as a percentage of vitamin A at the time of pregnancy diagnosis and during each trimester; no                   |

| Dietary Patterns                                                                                                                                        | Breastfeeding | Weight | Other Recommendations/Comments                                                                                                                                                                                                                                                                                                                                                                                                                                                                                                                                                                                                                                 |
|---------------------------------------------------------------------------------------------------------------------------------------------------------|---------------|--------|----------------------------------------------------------------------------------------------------------------------------------------------------------------------------------------------------------------------------------------------------------------------------------------------------------------------------------------------------------------------------------------------------------------------------------------------------------------------------------------------------------------------------------------------------------------------------------------------------------------------------------------------------------------|
| <p>modifications in the dialysis prescription. If intensive dialysis is undertaken the restriction on certain fruits and vegetables can be relaxed.</p> |               |        | <p>supplement would be given unless these measurements indicated deficiency as toxicity can easily occur). Vitamin E supplementation is not recommended. Iron supplementation (2-3g additional iron; if erythropoietin therapy is initiated during pregnancy at least 150 mg of iron will be needed for each g/dL increase in haemoglobin desired; IV iron (100 mg/dose) weekly for a 10-week period is recommended.</p>                                                                                                                                                                                                                                       |
| <i>Reviews</i>                                                                                                                                          |               |        |                                                                                                                                                                                                                                                                                                                                                                                                                                                                                                                                                                                                                                                                |
|                                                                                                                                                         |               |        | <p>In patients who are not iron overloaded and whose transferrin saturation is 30% or less, 500 mg of IV iron can be given when pregnancy is diagnosed. Oral ferrous sulfate (325 mg 3x/day) can also be used.). Folate (1.8 mg/day) is recommended. A calcium supplement (1 g/day) of a partially absorbed phosphate binder is warranted in CAPD patients (however, the patient should be monitored carefully for hypercalcemia). Measure levels of 1,25 OH<sub>2</sub> vitamin D<sub>3</sub> and only supplement if the level is low, phosphorus is controlled, and the calcium/phosphate product is &lt;65. Excessive zinc ingestion can lead to copper</p> |

|                                              | Dietary Patterns                                                                                         | Breastfeeding                                                                                                                                                                                                                                                                                                                                                                                                                                                                                                                | Weight                                                        | Other Recommendations/Comments                                                                                                                                                                                              |
|----------------------------------------------|----------------------------------------------------------------------------------------------------------|------------------------------------------------------------------------------------------------------------------------------------------------------------------------------------------------------------------------------------------------------------------------------------------------------------------------------------------------------------------------------------------------------------------------------------------------------------------------------------------------------------------------------|---------------------------------------------------------------|-----------------------------------------------------------------------------------------------------------------------------------------------------------------------------------------------------------------------------|
|                                              |                                                                                                          |                                                                                                                                                                                                                                                                                                                                                                                                                                                                                                                              |                                                               | deficiency and blood dyscrasia, so zinc supplementation may not be completely benign.                                                                                                                                       |
| Bili et al. (2013)<br>Greece [71]            | Not reported                                                                                             | Not reported                                                                                                                                                                                                                                                                                                                                                                                                                                                                                                                 | Not reported                                                  | Iron, folic acid, and vitamin D (if indicated).                                                                                                                                                                             |
| <b>Case Reports/Case Series</b>              |                                                                                                          |                                                                                                                                                                                                                                                                                                                                                                                                                                                                                                                              |                                                               |                                                                                                                                                                                                                             |
| Lim et al. (2017)<br>Malaysia [72]           | Not reported                                                                                             | Not reported                                                                                                                                                                                                                                                                                                                                                                                                                                                                                                                 | Not reported                                                  | Nil                                                                                                                                                                                                                         |
| Sulaiman et al. (2014)<br>United States [73] | Not reported                                                                                             | Not reported                                                                                                                                                                                                                                                                                                                                                                                                                                                                                                                 | Increase dry weight by 0.5 kg/week in the 2nd/3rd trimesters. | Case 3 was non-compliant with both medical therapy and dialysis. Hypophosphatemia can develop in patients due to daily dialysis, especially in patients who are compliant with a low phosphorus diet and phosphate binders. |
| Kondakova et al. (2023)<br>Russia [74]       | Compliance with the water-drinking regime and phosphorous/potassium/sodium restrictions was recommended. | Breastfeeding is not advised since the concentration of nutrients is low, and the content of toxic substances exceeds permissible limits. High urea concentrations can denature proteins which negatively affects the composition of milk, blocks digestive enzymes and changes the conformation of immunoglobulins. In this case, the patient stopped breastfeeding a month after delivery due to insufficient breast milk and the inability to express it in a certain time period. More research in this space is needed. | Not reported                                                  | Nil                                                                                                                                                                                                                         |

|                                             | Dietary Patterns                                                                                                                                                                           | Breastfeeding                                                                                                                                                                                                                                                       | Weight                                                                                                                  | Other Recommendations/Comments                                                                                                                                                                                                                                                                                                                                                                                                                                                       |
|---------------------------------------------|--------------------------------------------------------------------------------------------------------------------------------------------------------------------------------------------|---------------------------------------------------------------------------------------------------------------------------------------------------------------------------------------------------------------------------------------------------------------------|-------------------------------------------------------------------------------------------------------------------------|--------------------------------------------------------------------------------------------------------------------------------------------------------------------------------------------------------------------------------------------------------------------------------------------------------------------------------------------------------------------------------------------------------------------------------------------------------------------------------------|
| Cao et al. (2018)<br>China [75]             | Not reported                                                                                                                                                                               | Not reported                                                                                                                                                                                                                                                        | Weight gain of 0.5 kg/week was prescribed.                                                                              | Expect weight gain of 1-1.5 kg in the 1st trimester, then increase from 0.45-1 kg/week [47,51].                                                                                                                                                                                                                                                                                                                                                                                      |
| Arai et al. (2020)<br>Japan [76]            | Increased dietary intake of phosphate could be effective in reducing hypophosphatemia. Aim for adequate dietary intake of potassium to help maintain serum levels within the normal range. | Not reported                                                                                                                                                                                                                                                        | Increase in dry weight by 300-400 g/week in the 1st/2nd trimesters, then taper down by 200 g/week in the 3rd trimester. | Minimal weight gain of 1.0-1.5 kg in the 1st trimester and 0.45 kg/week thereafter can be expected [15].<br>Previous guidelines recommend that dry weight should be increased by 300-500 g/week in the 2nd/3rd trimesters [5,230]. Oral phosphate supplements could be effective in reducing hypophosphatemia. IV iron for anaemia is recommended [24].                                                                                                                              |
| Sprenger-Mähr et al. (2019)<br>Austria [77] | Not reported                                                                                                                                                                               | The mother breastfed for only a few weeks after the first pregnancy and for 5 weeks after the second pregnancy. It is suggested that in a patient with sHPT and bone disease breastfeeding should be discouraged to prevent further aggravation of bone resorption. | Dry weight should be adjusted weekly.                                                                                   | Pregnancy in a patient with uncontrolled sHPT should not be pursued. A woman on HD should be advised to get pregnant only after PTH and mineral metabolism are well controlled. In a dialysis patient in whom renal calcitriol synthesis is absent, calcitriol supplementation and non-native vitamin D supplementation is necessary for intestinal calcium absorption. WHO recommends 1.5-2 g/day calcium supplementation for pregnant women after the 20th week of pregnancy [37]. |
| Mambap et al. (2023)<br>Cameroon [78]       | Dietary intake was not limited, however salt restriction was recommended. The patient was encouraged to increase intake of dairy and animal protein to prevent hypophosphatemia in         | The child was fed on commercial breast milk substitutes from birth till 5 months.                                                                                                                                                                                   | A 0.5 kg weight increase/fortnight was prescribed.                                                                      | Not reported                                                                                                                                                                                                                                                                                                                                                                                                                                                                         |

|                                  | Dietary Patterns                                                                                                                                                                                                                                                                                                                                                                                                                                                                                                                    | Breastfeeding                                                                                                                                                                                                                                                                                                                                                                                                                                                                                                                                                                            | Weight                                                                    | Other Recommendations/Comments                                                                                                                                                                                                                                                                                                                                                    |
|----------------------------------|-------------------------------------------------------------------------------------------------------------------------------------------------------------------------------------------------------------------------------------------------------------------------------------------------------------------------------------------------------------------------------------------------------------------------------------------------------------------------------------------------------------------------------------|------------------------------------------------------------------------------------------------------------------------------------------------------------------------------------------------------------------------------------------------------------------------------------------------------------------------------------------------------------------------------------------------------------------------------------------------------------------------------------------------------------------------------------------------------------------------------------------|---------------------------------------------------------------------------|-----------------------------------------------------------------------------------------------------------------------------------------------------------------------------------------------------------------------------------------------------------------------------------------------------------------------------------------------------------------------------------|
|                                  | the absence of phosphorus tablets.                                                                                                                                                                                                                                                                                                                                                                                                                                                                                                  |                                                                                                                                                                                                                                                                                                                                                                                                                                                                                                                                                                                          |                                                                           |                                                                                                                                                                                                                                                                                                                                                                                   |
| Buil et al. (2015) Spain [79]    | Culturally appropriate diets must be prescribed. Diets in these patients have changed from very restrictive to less restrictive over time. In this case the patient had an Asian diet based around on rice, which was already described as optimal for kidney patients in the 1960s (rich in amino acids and low in protein, resulting in lower urea production and increased appetite)[48]. The patient was advised to increase the amount of other foods by following a free diet. The main objective is to prevent malnutrition. | Breastfeeding should not be ruled out. In consultation with the lactation committee Spanish Association of Pediatrics "there are no justified reasons to stop breastfeeding in the case of dialysis. The risk of hepatitis C is higher among people on dialysis, but hepatitis C does not contraindicate breastfeeding. Breastfeeding does not have to affect the balance of liquids and solutes that are carried out on dialysis." In this case, the child enjoyed mixed lactation (the mother's sister gave birth the day before and tandem lactated the two children until 5 months). | Not reported                                                              | Occasionally enteral nutrition is administered during HD sessions to cover deficiencies [88].                                                                                                                                                                                                                                                                                     |
| Manisco et al. (2015) Italy [47] | Increased dietary intake to correct hypophosphataemia is recommended [107]                                                                                                                                                                                                                                                                                                                                                                                                                                                          | Not reported                                                                                                                                                                                                                                                                                                                                                                                                                                                                                                                                                                             | Dry weight increase of 800-1,000 g/month in 3rd trimester was postulated. | Measure 25-OH vitamin D every trimester and supplement if low [11]. Water-soluble vitamins, folate (1 mg/day), vitamin C, thiamine, riboflavin, niacin, vitamin B6 [16], calcium (1.5-2 g/day), oral or IV iron (10-15 mg/day), and calcitriol to control hyperparathyroidism and 1,25-OH-vitamin D deficiency, and oral supplements for hypo-phosphataemia are recommended [24]. |

|                                                | <b>Dietary Patterns</b>                                                                            | <b>Breastfeeding</b>               | <b>Weight</b>                                                                                                                                     | <b>Other Recommendations/Comments</b>                                                                                                                                                                                                                                                                                                                                                   |
|------------------------------------------------|----------------------------------------------------------------------------------------------------|------------------------------------|---------------------------------------------------------------------------------------------------------------------------------------------------|-----------------------------------------------------------------------------------------------------------------------------------------------------------------------------------------------------------------------------------------------------------------------------------------------------------------------------------------------------------------------------------------|
| Seker (2016)<br>Turkey [80]                    | Not reported                                                                                       | Not reported                       | The estimated dry weight of the patient was increased according to her weight gain. Her weight gain was a total of 9 kg during the pregnancy.     | Intensive dialysis regimens reduce the foetal uremic environment, minimize large fluid shifts and placental hypoperfusion and allow greater diet freedom with nutritional benefits.                                                                                                                                                                                                     |
| Shanmugalingam et al. (2021)<br>Australia [81] | Not reported                                                                                       | The patient breastfed her newborn. | Not reported                                                                                                                                      | Nil                                                                                                                                                                                                                                                                                                                                                                                     |
| Haase et al. (2005)<br>Germany [82]            | No dietary restrictions imposed (all pregnant women enjoyed the liberal intake of fluid and food). | Not reported                       | Estimated maternal dry weight was increased by 200-400g every 10 days (if judged appropriate).                                                    | Nil                                                                                                                                                                                                                                                                                                                                                                                     |
| Yu et al. (2015)<br>China [83]                 | Not reported                                                                                       | Not reported                       | 1st trimester: Minimum weight gain of 1-1.5 kg/week.<br>After this weight should increase by 0.45-1 kg/week [15].                                 | Nil                                                                                                                                                                                                                                                                                                                                                                                     |
| Espinoza et al. (2013)<br>Chile [86]           | Not reported                                                                                       | Not reported                       | Calculation of dry weight according to the Evans Blue method (case 1).<br>Dry weight increased 500g every 2 weeks per protocol (cases 2,3,4,5,6). | Frequent and prolonged dialysis allows for a higher protein-calorie intake. IDPN has not shown survival advantages in malnourished HD patients but in the event of a pregnancy could have a role.                                                                                                                                                                                       |
| Choi et al. (2018)<br>Korea [87]               | Not reported                                                                                       | Not reported                       | Not reported                                                                                                                                      | Oral iron/folic acid/vitamin B12 should be supplemented [11,57].                                                                                                                                                                                                                                                                                                                        |
| Tuot et al. (2009)<br>United States [88]       | Not reported                                                                                       | Not reported                       | An appropriate weight gain of 11.5-16 kg is expected per singleton pregnancy [231].                                                               | Intensive dialysis regimens are believed to reduce the fetal uremic environment, minimize large fluid shifts and placental hypoperfusion and allow greater dietary freedom with nutritional benefits [15,232]. The use of parenteral nutrition in pregnant dialysis-dependent patients has been reported only once [128].<br>Folic acid, zinc, and renal multivitamins are recommended. |

|                                          | Dietary Patterns                                                                                                                                                                                                                                    | Breastfeeding | Weight                                                                                | Other Recommendations/Comments                                                                                                                                                                                                                                                                                                                                                                                                                                                      |
|------------------------------------------|-----------------------------------------------------------------------------------------------------------------------------------------------------------------------------------------------------------------------------------------------------|---------------|---------------------------------------------------------------------------------------|-------------------------------------------------------------------------------------------------------------------------------------------------------------------------------------------------------------------------------------------------------------------------------------------------------------------------------------------------------------------------------------------------------------------------------------------------------------------------------------|
| Ribeiro & Silva (2020) Portugal [90]     | There is greater freedom with diet and fluids during HD, which aims to provide for better phosphorus uptake.                                                                                                                                        | Not reported  | An average weight increase of 300 g/week was observed.                                | Dry weight increases of 0.3-0.5 kg every 7-10 days from the 20th week of gestation is suggested. The patient was not consistently compliant with dialysis. Zinc, double dose of water-soluble vitamins, folic acid, B-complex vitamins, $\leq 1.5 \mu\text{g}$ of calcitriol/week (to correct pHPT or deficiency), 1-2g calcium carbonate/day (in patients with phosphorus levels $>5.5 \text{ mg/dL}$ and in the absence of hypercalcemia), and IV iron has also been recommended. |
| Giofre' et al. (2007) Italy [93]         | The patient was living in a geographical context where the Mediterranean diet is widespread. She followed a diet rich in white meat, fish, olive oil for dressings, fruit, and vegetables.                                                          | Not reported  | Total weight gain of 19.3 kg (case 2).<br>Total weight gain of 13 kg (case 3).        | Moderate physical activity is recommended.                                                                                                                                                                                                                                                                                                                                                                                                                                          |
| Malik et al. (1997) Saudi Arabia [94]    | A high calorie diet was recommended.                                                                                                                                                                                                                | Not reported  | Not reported                                                                          | Nil                                                                                                                                                                                                                                                                                                                                                                                                                                                                                 |
| Campos-Collado et al. (2016) Mexico [95] | Eliminate high phosphorus foods (except for dairy products), aim for 5 meals/day, and decrease intake of sweetened carbonated beverages, high-fat Mexican food, and high-sodium/sugar foods. Increase vegetable intake and low-fat cooking methods. | Not reported  | Weight gain of 0.23-0.33 kg/week (in pregnant overweight women) is recommended [196]. | Physical activity is encouraged. The patient used a stationary bike during her HD sessions 4 days/week.                                                                                                                                                                                                                                                                                                                                                                             |

|                                             | Dietary Patterns                                                                                             | Breastfeeding | Weight                                                                                                                                                           | Other Recommendations/Comments                                                                                                                                                                                                                                                                                                                                                                                          |
|---------------------------------------------|--------------------------------------------------------------------------------------------------------------|---------------|------------------------------------------------------------------------------------------------------------------------------------------------------------------|-------------------------------------------------------------------------------------------------------------------------------------------------------------------------------------------------------------------------------------------------------------------------------------------------------------------------------------------------------------------------------------------------------------------------|
| Reister et al. (1999)<br>Germany [98]       | Intensification of the dialysis treatment made the almost complete removal of dietary restrictions possible. | Not reported  | The patient's interdialytic weight increase was 1,500-2,500g. The patient's dry weight did not increase more than a that of a usual pregnancy.                   | Nil                                                                                                                                                                                                                                                                                                                                                                                                                     |
| Swaroop et al. (2009)<br>United States [99] | Not reported                                                                                                 | Not reported  | Not reported                                                                                                                                                     | Prevent metabolic acidosis. Manage mineral metabolism and avoid hypo- and hypercalcemia. Water-soluble vitamins and zinc supplementation is recommended. Prevent hypomagnesemia with adequate dialysis baths and eventually with oral supplements.                                                                                                                                                                      |
| Yoo et al. (2004)<br>United States [100]    | Not reported                                                                                                 | Not reported  | Programmed adjustment of dry weight was done by revising the estimated dry weight weekly to an expected weight gain during progression of the triplet pregnancy. | Parenteral iron should be given in small doses ( $\leq 100$ mg/dose) to avoid acute iron toxicity in the foetus.<br>Water-soluble vitamins are lost during dialysis and require supplementation. Pregnant patients on a 2.5 mEq/L calcium dialysate usually require oral calcium supplementation (2 g/day) [11,22,120,186].                                                                                             |
| Giatras et al. (1998)<br>United States [15] | Increased dialysis time allows for a more liberal diet (protein and potassium) and fluid intake.             | Not reported  | Estimated dry weight was increased by 500g every 10 days, corresponding to usual maternal weight gain in a normal pregnancy.                                     | Minimal weight gain of 1-1.5 kg in the 1st trimester, then 0.45 kg (1 pound)/week thereafter is recommended. A 2.5 mmol/L dialysate needs to be supplemented with 1-2g oral calcium carbonate to avoid calcium loss. IV iron (500 mg) is recommended as soon as pregnancy is diagnosed if transferrin saturated is $<30\%$ [70]. Between 0.8-1.0 mg folate/day (HD), and double usual dose of water-soluble vitamins is |



| Dietary Patterns                             | Breastfeeding                                                                                 | Weight       | Other Recommendations/Comments                                                                                                                                                                                                                                                                                                                             |
|----------------------------------------------|-----------------------------------------------------------------------------------------------|--------------|------------------------------------------------------------------------------------------------------------------------------------------------------------------------------------------------------------------------------------------------------------------------------------------------------------------------------------------------------------|
|                                              |                                                                                               |              | suggested [233]. Vitamin D should be monitored and supplemented only if low. Supplementing other divalent cations and trace elements are rarely necessary. Vitamin A supplementation is not advised                                                                                                                                                        |
| Luciani et al. (2002)<br>Italy [101]         | High calorie/high protein diet was suggested.                                                 | Not reported | Dry weight was increased progressively on average 1.2±0.5 kg in the 1st trimester, and 0.5 kg/week from the 2nd trimester. Maternal dry weight and weight gain were estimated regularly and re-evaluated according to changes in the estimated foetal weight.                                                                                              |
| Hadj Sadek et al. (2011)<br>Morocco [102]    | An unrestricted diet was recommended.                                                         | Not reported | 2nd trimester: Weight gain 300 g/week.<br>3rd trimester: Weight gain 300-500 g/week.                                                                                                                                                                                                                                                                       |
| Pepperell et al. (1970)<br>Australia [103]   | No salt restriction was prescribed.                                                           | Not reported | Not reported                                                                                                                                                                                                                                                                                                                                               |
| Abu-Zaid et al. (2013)<br>Saudi Arabia [104] | Increased nutritional phosphorus ingestion was recommended to correct hypophosphatemia [112]. | Not reported | Not reported                                                                                                                                                                                                                                                                                                                                               |
|                                              |                                                                                               |              | Treatment with vitamin D, calcium, and blood transfusion may play an important role in addition to dialysis in ensuring normal foetal development.                                                                                                                                                                                                         |
|                                              |                                                                                               |              | Calcium carbonate oral supplementation (1-2 g) [11,24], oral phosphorous supplements to correct hypophosphatemia [112], IV iron (500 mg in all pregnant dialysis patients with transferrin saturation <30%) [70], folic acid (0.8-1-5 mg/day) [11,117], and water-Soluble vitamins [15] are recommended. Vitamin D3 levels should be checked regularly and |

| Dietary Patterns                                    | Breastfeeding                                                                                    | Weight                                                                                                                                   | Other Recommendations/Comments                                                                                                                                |                                                                                                                                                                                                                                                                                                                                         |
|-----------------------------------------------------|--------------------------------------------------------------------------------------------------|------------------------------------------------------------------------------------------------------------------------------------------|---------------------------------------------------------------------------------------------------------------------------------------------------------------|-----------------------------------------------------------------------------------------------------------------------------------------------------------------------------------------------------------------------------------------------------------------------------------------------------------------------------------------|
| Al-Saran & Sabry (2008)<br>Saudi Arabia [105]       | Diet was liberalised with intensive dialysis (protein and potassium) [193].                      | Not reported                                                                                                                             | After the 1st trimester weight gain is usually linear (~1 pound/week) [120].                                                                                  | supplemented when levels are low [15].<br>IV iron (500 mg at diagnosis of pregnancy if transferrin saturation <30%) [186], folate, and water-soluble vitamins is recommended [15]. Adjustment of vitamin D may be required and should be guided by measurement of vitamin D, parathyroid hormone, calcium, and phosphorus levels [119]. |
| Ackrill et al. (1975)<br>United Kingdom [106]       | Relatively free dietary intake was recommended (partially due to intensive dialysis).            | Not reported                                                                                                                             | Interdialytic weight gain of <0.5 kg was prescribed/observed.                                                                                                 | Nil                                                                                                                                                                                                                                                                                                                                     |
| Gómez Vázquez et al. (2007)<br>Mexico [107]         | Not reported                                                                                     | Not reported                                                                                                                             | Not reported                                                                                                                                                  | Water-soluble vitamins and zinc are recommended [27].                                                                                                                                                                                                                                                                                   |
| Mohammed et al. (2021)<br>Trinidad and Tobago [108] | A ‘normal’ diet to avoid hypokalemia and hypophosphatemia was recommended.                       | The patient opted to breastfeed.                                                                                                         | Target weight of 0.5 kg/week was increased from the 2nd trimester.                                                                                            | Nil                                                                                                                                                                                                                                                                                                                                     |
| Alhwiesh (2015)<br>Saudi Arabia [109]               | Not reported                                                                                     | Not reported                                                                                                                             | Not reported                                                                                                                                                  | Water-soluble vitamins and zinc are recommended.                                                                                                                                                                                                                                                                                        |
| Pipili et al. (2011)<br>Greece [110]                | Protein and caloric consumption were liberalised to allow for a greater variety of food choices. | The patient produced little breast milk and was started on bromocriptine mesylate (2.5 mg 2x/day for 2 weeks) for lactation suppression. | Dry weight was gradually increased (0.5 kg every 15 days for the first 2 months, 0.5 kg/week for the following 2 months, and 1 kg/week in the last 2 months). | Folate, trace elements, water-soluble vitamins, and iron are recommended.                                                                                                                                                                                                                                                               |
| Ramadani et al. (2018)<br>Indonesia [111]           | Controlled diet (protein and salt) was recommended.                                              | Not reported                                                                                                                             | An increase in estimated ideal weight of ~0.5 kg/week is recommended (close clinical                                                                          | Minimum 800-1,000mg iron supplement is required by mother and foetus during pregnancy [24,187]. Folate                                                                                                                                                                                                                                  |

| Dietary Patterns                                | Breastfeeding                                                                                                                | Weight                                                                                                      | Other Recommendations/Comments                                                                                                                                                        |                                                                                                                                                                                                               |
|-------------------------------------------------|------------------------------------------------------------------------------------------------------------------------------|-------------------------------------------------------------------------------------------------------------|---------------------------------------------------------------------------------------------------------------------------------------------------------------------------------------|---------------------------------------------------------------------------------------------------------------------------------------------------------------------------------------------------------------|
|                                                 |                                                                                                                              | follow-up and frequent assessments in the 2nd/3rd trimesters is required).                                  | (1 mg/day), phosphorous (oral or in dialysate), vitamin C, thiamine, riboflavin, niacin, and vitamin B6 are also recommended. Measure and supplement 25-OH vitamin D every trimester. |                                                                                                                                                                                                               |
| Hussain et al. (2005) United States [112]       | Intensive dialysis enables a liberal diet (higher in protein and potassium).                                                 | Not reported                                                                                                | Not reported                                                                                                                                                                          | Vitamin D metabolites, replenishment of decreased 25-OH-vitamin D stores, provision of adequate 1,25-di-(OH)-vitamin D (either orally or IV), and IV iron is recommended [15,138,193].                        |
| Kedzierska et al. (2011) Poland & Germany [113] | 6-7 well-balanced meals/day and slowly absorbed carbohydrates was recommended.                                               | Not reported                                                                                                | Not reported                                                                                                                                                                          | Postprandial hyperglycemia was treated successfully with diet. The postprandial glucose level did not reach 160 mg/dL. The patient did not use insulin. Electrolyte replacement and vitamin D is recommended. |
| Bahadi et al. (2010) Morocco [61]               | Intensive dialysis allows for a liberalised diet (protein and potassium).                                                    | Not reported                                                                                                | Weight gain of 0.3-0.5 kg/week in the 2nd/3rd trimesters was prescribed for all patients.                                                                                             | A 500 mg dose of iron (as soon as pregnancy is diagnosed if transferrin saturation is <30%) [70] and 0.8-1.0 mg folate/day [117] is recommended.                                                              |
| López-Menchero et al. (2004) Spain [115]        | Not reported                                                                                                                 | The patient began breastfeeding 5 days postpartum and continued mixed lactation for the following 4 months. | Not reported                                                                                                                                                                          | Water-soluble vitamins and folic acid (post-dialysis) are recommended. Avoid hyperphosphatemia and hypocalcemia (calcium binders).                                                                            |
| Coyle et al. (2008) United States [116]         | Liberal potassium and phosphorus-rich foods, with daily variety of high quality protein food sources for meals and snacks is | Not reported                                                                                                | Not reported                                                                                                                                                                          | Nil                                                                                                                                                                                                           |

|                                                  | Dietary Patterns                                                                                                                                                                                                                                     | Breastfeeding                       | Weight                                                                                                                                                                                                                                                         | Other Recommendations/Comments                                                                                                                                                                                                                                                                           |
|--------------------------------------------------|------------------------------------------------------------------------------------------------------------------------------------------------------------------------------------------------------------------------------------------------------|-------------------------------------|----------------------------------------------------------------------------------------------------------------------------------------------------------------------------------------------------------------------------------------------------------------|----------------------------------------------------------------------------------------------------------------------------------------------------------------------------------------------------------------------------------------------------------------------------------------------------------|
|                                                  | recommended. 3 full meals and snacks daily, with liberal oral fluid intake is also suggested.                                                                                                                                                        |                                     |                                                                                                                                                                                                                                                                |                                                                                                                                                                                                                                                                                                          |
| Sheriff et al. (1978)<br>United Kingdom<br>[118] | Not reported                                                                                                                                                                                                                                         | Not reported                        | Not reported                                                                                                                                                                                                                                                   | Nil                                                                                                                                                                                                                                                                                                      |
| Walsh (2002)<br>United Kingdom<br>[119]          | The patient ate bananas and chocolate to compensate for low potassium levels and was advised to increase protein and calcium intake. Due to the patient's personal circumstances the nurses arranged for a hot meal to be delivered every afternoon. | The infant was fed on formula milk. | The major influx of weight change occurred in the 2nd trimester (here the target weight increased by 7 kg, however the target weight did not exceed the actual weight at any time throughout the pregnancy). The team aimed not to take off >1.5 kg fluid/day. | There are no rules to determine target weight, just recommendations from previous studies: Increase dry weight by 0.5 kg/week in 3rd/4th month and 1 kg/week in 5th/6th month [15], or increase weight by 300 g/week in the 2nd trimester (total of 3.6 kg) and 300-500g/week in the 3rd trimester [91]. |
| Cocîrță et al. (2016)<br>Romania [121]           | Not reported                                                                                                                                                                                                                                         | Not reported                        | Weight gain of 300-500 g/week during the 2nd/3rd trimesters is recommended [119].                                                                                                                                                                              | Water-soluble vitamins (vitamin C, thiamine, riboflavin, niacin, vitamin B6) [234], vitamin B12, calcium (1.5-2 g/day), and iron (oral/IV) supplementation is recommended [5,24].<br>25 OH vitamin D3 must be measured every trimester and supplemented if levels are low [15].                          |
| Guida et al. (2003)<br>Italy [123]               | A balanced diet is recommended.                                                                                                                                                                                                                      | Not reported                        | A total weight gain of 12 kg total at the end of the pregnancy was observed (this coincided with the conventional standard of 12.5 kg). The main goal in controlling dry weight is to achieve a good blood pressure control.                                   | Nil                                                                                                                                                                                                                                                                                                      |

|                                                      | Dietary Patterns                                                                                                                                                                                                                                                                                                                                                                                                                                                                                                                                                                                                                                                                                                                                             | Breastfeeding                                    | Weight                                                                                               | Other Recommendations/Comments                                                                                                                                                                                                             |
|------------------------------------------------------|--------------------------------------------------------------------------------------------------------------------------------------------------------------------------------------------------------------------------------------------------------------------------------------------------------------------------------------------------------------------------------------------------------------------------------------------------------------------------------------------------------------------------------------------------------------------------------------------------------------------------------------------------------------------------------------------------------------------------------------------------------------|--------------------------------------------------|------------------------------------------------------------------------------------------------------|--------------------------------------------------------------------------------------------------------------------------------------------------------------------------------------------------------------------------------------------|
| McPhatter & Drumheller (2008)<br>United States [125] | A Vietnamese diet consists of rice, beans, and vegetables with little or no dairy products [235]. The patient had a liberal diet without limits on phosphorus or potassium intake. The patient tolerated milk and agreed to try and drink one glass per day while increasing intake of fish/meat/egg/rice/nuts/beans to improve protein status. Small meals and snacks were encouraged. The family was instrumental in improving the patient's nutritional status by providing 3 cooked meals per day, and the patient's sister introduced her to Boost® (a protein/calorie nutritional supplement) of which she willingly took 120-240 mL/day. The patient's husband also found a Subway® sandwich she liked and would eat during every dialysis treatment. | Not reported                                     | Not reported                                                                                         | The patient was seen daily by the dietitian for evaluation of intake and encouragement to continue to improve dietary intake. The patient was not willing to try protein/calorie nutritional supplements or protein supplements initially. |
| Sandhu et al. (2014)<br>United States [127]          | Not reported                                                                                                                                                                                                                                                                                                                                                                                                                                                                                                                                                                                                                                                                                                                                                 | Breast milk in patients with ESRD will have high | Minimum 1-1.5 kg weight gain in 1st trimester and 0.45-1 kg/week thereafter is recommended [15]. The | Water-soluble vitamins (doubling of the dose of daily multivitamins, particularly folic acid), calcium (30 g/day) [238], increased doses of                                                                                                |

|                                                           | Dietary Patterns                                                                                                                                                                                                                                                                                                                                                                                                                                                                               | Breastfeeding                                                                                           | Weight                                                                                                                                                                           | Other Recommendations/Comments                                                                                                                                                                                                                              |
|-----------------------------------------------------------|------------------------------------------------------------------------------------------------------------------------------------------------------------------------------------------------------------------------------------------------------------------------------------------------------------------------------------------------------------------------------------------------------------------------------------------------------------------------------------------------|---------------------------------------------------------------------------------------------------------|----------------------------------------------------------------------------------------------------------------------------------------------------------------------------------|-------------------------------------------------------------------------------------------------------------------------------------------------------------------------------------------------------------------------------------------------------------|
|                                                           |                                                                                                                                                                                                                                                                                                                                                                                                                                                                                                | concentration of urea, and in cases of breast-feeding it can lead to osmotic diuresis in infants [236]. | estimated dry weight should be increased to 400 g/week after the 1st trimester [237]. Healthy maternal weight gain in a pregnant woman with a normal BMI should be 11.5-15.9 kg. | potassium supplementation, and phosphate replacement (as required in PD patients) is suggested. Phosphate binders may be discontinued in HD patients [236]. IV magnesium must be administered with caution to pregnant women on PD to avoid toxicity [239]. |
| Brookhyser (1989)<br>United States [128]                  | Modifications in dietary sodium, potassium, and phosphate were made on a sliding scale dependent on clinical evaluation/ laboratory data. High biological value protein is recommended. A liberal diet (high protein/calorie) was allowed (intensive dialysis). The patient was advised to eat some CHO post-HD treatments, prior to leaving the HD unit, to avoid post-dialysis hypoglycaemia (sometimes seen after discontinuation of glucose infusions, although this was not encountered). | Not reported                                                                                            | Interdialytic fluid weight gains were limited to 1 kg.                                                                                                                           | Nil                                                                                                                                                                                                                                                         |
| Park et al. (2006)<br>Korea [129]                         | Increased calorie and protein needs. High protein diet with folic acid, calcium, and iron prescribed.                                                                                                                                                                                                                                                                                                                                                                                          | Not reported                                                                                            | Body weight should be adjusted to increase by about 450-500g.                                                                                                                    | Oral/IV iron, folic acid (0.8-2 mg/day), and calcium supplementation is recommended.                                                                                                                                                                        |
| Yattara et al. (2019)<br>Mali & Republic of Senegal [130] | A free diet is recommended.                                                                                                                                                                                                                                                                                                                                                                                                                                                                    | Not reported                                                                                            | Expect weight gain of 1-1.5 kg/month in the 1st trimester and 500 g/week in the 2nd/3rd trimesters [240].                                                                        | IV iron [138] and vitamin supplementation (B1, B2, B9, B12, C, D) is recommended.                                                                                                                                                                           |

|                                               | Dietary Patterns                                                                                                                                                                                                                                                                                                                                                                                                                                                                                                                            | Breastfeeding | Weight                                                                                                                                                        | Other Recommendations/Comments                                                                                                                                                                                                                                                                                                                                                                                                          |
|-----------------------------------------------|---------------------------------------------------------------------------------------------------------------------------------------------------------------------------------------------------------------------------------------------------------------------------------------------------------------------------------------------------------------------------------------------------------------------------------------------------------------------------------------------------------------------------------------------|---------------|---------------------------------------------------------------------------------------------------------------------------------------------------------------|-----------------------------------------------------------------------------------------------------------------------------------------------------------------------------------------------------------------------------------------------------------------------------------------------------------------------------------------------------------------------------------------------------------------------------------------|
| Seed & Gilbertson (2022)<br>Australia [132]   | A plant-based diet was started at the commencement of HD (based on advice from the treating nephrologist).                                                                                                                                                                                                                                                                                                                                                                                                                                  | Not reported  | Not reported                                                                                                                                                  | HD ceased at 31 weeks due to stability of renal function and patient request. The patient associated improvement in urea levels with better adherence to a plant-based diet (urea 10.9 mmol/L with strict adherence to plant-based diet, 16.3 mmol/L prior to beginning plant-based diet, and 14.8 mmol/L with faltering adherence to plant-based diet).                                                                                |
| Henderson (1996)<br>United States [133]       | The patient was prescribed a diet according to the American Diabetic Association to avoid hypoglycemia and address early satiety. 3 meals and 3 snacks were provided. A 10 am snack on dialysis resulted in nausea and vomiting so the meal pattern was then altered to include 3 meals, a 2 pm snack, and an 8 pm snack. No fluid restriction was needed (due to daily dialysis and urine output of 400 mL/day until the time of delivery). Some flexibility with the meal pattern was necessary to meet protein and calorie requirements. | Not reported  | Interdialytic weight gains were 1.0-2.5 kg without a fluid restriction. Monitoring adequacy of dry weight gain was complicated by fluid shifts and retention. | Hypoglycemia at 2 am occurred at 22-23 weeks gestation despite 45g of carbohydrate at 8 pm. Whole milk was used to treat low blood sugars but did not exceed 1-2 cups (0.24-0.48L)/day. Calorie, protein, and key nutrient intake records twice weekly are recommended to ensure adequate intake and aid in estimating dry weight. Small doses (100 mg/dose weekly for 10 weeks) of IV iron dextran can be used in these patients [70]. |
| Melendez et al. (1988)<br>United States [135] | Increased intake of fresh fruits and vegetables are encouraged for potassium value and contribution of calories and fibre. These                                                                                                                                                                                                                                                                                                                                                                                                            | Not reported  | Target weights must be adjusted frequently to accommodate a growing foetus [241].                                                                             | Case 2 had diabetes mellitus managed with exceptional blood glucose control with peritoneal insulin throughout pregnancy. Normal                                                                                                                                                                                                                                                                                                        |

|                                                    | Dietary Patterns                                                                                                                                                                                                                                                                                                                                      | Breastfeeding | Weight                                                                                                                                                                                                                                                                                     | Other Recommendations/Comments                                                                                                                                                                                                                                                                                                                                                                                                                                       |
|----------------------------------------------------|-------------------------------------------------------------------------------------------------------------------------------------------------------------------------------------------------------------------------------------------------------------------------------------------------------------------------------------------------------|---------------|--------------------------------------------------------------------------------------------------------------------------------------------------------------------------------------------------------------------------------------------------------------------------------------------|----------------------------------------------------------------------------------------------------------------------------------------------------------------------------------------------------------------------------------------------------------------------------------------------------------------------------------------------------------------------------------------------------------------------------------------------------------------------|
|                                                    | <p>patients require minimal fluid restriction and may need to be slightly over-hydrated to prevent possible complications related to dehydration [241]. A 2 g/day sodium restriction along with intensified dialysis enhances fluid balance and reduces the need for a fluid restriction [242].</p>                                                   |               |                                                                                                                                                                                                                                                                                            | <p>glucose levels in the diabetic patient are achieved with intraperitoneal insulin and strict blood glucose monitoring [243].</p> <p>Though hyperphosphataemia is a concern with increased dietary intake, it can easily occur if antacids are used to control morning sickness (careful monitoring of serum values, manipulation of dialysis, adjustment of intake, and phosphate binders are necessary). Calcium and vitamin/ mineral supplements are advised</p> |
| Vidal et al. (1998)<br>Uruguay [137]               | <p>The increase in calories was obtained with carbohydrates from corn starch, common sugar, and honey. Protein was added through high-biologic value protein from egg white, powder milk, and meat. Fluids were adjusted to diuresis and blood pressure in the 1st trimester, and diuresis, blood pressure, and weight in the 2nd/3rd trimesters.</p> | Not reported  | <p>In all 4 cases, the weight gain curve was recorded on the chart designed at the Latin American Center for Perinatology and Human Development. Pre-dialysis weights were plotted every 2 weeks. These weights were used because it was not possible to estimate a stable dry weight.</p> | <p>Special care in Sunday meals was recommended to the patients as they did not receive dialysis on this day.</p>                                                                                                                                                                                                                                                                                                                                                    |
| Hou et al. (1993)<br>United States [138]           | Not reported                                                                                                                                                                                                                                                                                                                                          | Not reported  | Not reported                                                                                                                                                                                                                                                                               | Nil                                                                                                                                                                                                                                                                                                                                                                                                                                                                  |
| Brookhyser et al.<br>(1996)<br>United States [139] | A liberal diet is recommended in these patients due to intensive                                                                                                                                                                                                                                                                                      | Not reported  | <p>Total weight gain of 15.8 kg (case 1) and 17 kg (case 2). The rate of weight gain was</p>                                                                                                                                                                                               | Nil                                                                                                                                                                                                                                                                                                                                                                                                                                                                  |



|                                              | Dietary Patterns                                                                                                                                                                                                                                                                                                  | Breastfeeding | Weight                                                                                                                                                                                            | Other Recommendations/Comments                                                                                                                                                                                                                                                            |
|----------------------------------------------|-------------------------------------------------------------------------------------------------------------------------------------------------------------------------------------------------------------------------------------------------------------------------------------------------------------------|---------------|---------------------------------------------------------------------------------------------------------------------------------------------------------------------------------------------------|-------------------------------------------------------------------------------------------------------------------------------------------------------------------------------------------------------------------------------------------------------------------------------------------|
|                                              | dialysis [244,245], however ongoing monitoring for excesses and deficiencies related to diet and blood chemistries are still needed. Guidelines for moderating fat and cholesterol intake were provided for preventative health care purposes due to increased cholesterol in last trimester of both pregnancies. |               | appropriate in both pregnancies. Fluid gains of 1-2 kg were maintained easily (cases 1,2). Dry weight assessments were performed with regularity to ensure that the target weights were achieved. |                                                                                                                                                                                                                                                                                           |
| Amoah & Arab (1991)<br>Saudi Arabia [140]    | Not reported                                                                                                                                                                                                                                                                                                      | Not reported  | Total maternal weight gain was 12.5 kg during the pregnancy.                                                                                                                                      | Nil                                                                                                                                                                                                                                                                                       |
| Shah et al. (2007)<br>United Kingdom [141]   | Increased calorie and protein intake (diet liberalisation) was recommended due to the intensified dialysis regimen.                                                                                                                                                                                               | Not reported  | Not reported                                                                                                                                                                                      | Pregnant dialysis patients on a 2.5 mEq/L calcium dialysate usually require oral calcium supplements of 2 g/day.                                                                                                                                                                          |
| Dunbeck et al. (1992)<br>United States [142] | High protein/high calorie diet was prescribed, supplemented with Ensure™.                                                                                                                                                                                                                                         | Not reported  | During the first week of PD the patient's weight increased by 1 kg.                                                                                                                               | Blood sugar and insulin management for diabetics is easier to achieve on CAPD [243]. IV iron is recommended. Maintain normal serum calcium and phosphorus levels (calcium-based binders and calcitriol are considered safe in pregnancy, but sevelamer and cinacalcet should be avoided). |
| Cattran & Benzie (1983)<br>Canada [143]      | No added salt or potassium was recommended, otherwise regular daily diet.                                                                                                                                                                                                                                         | Not reported  | Weekly assessment noted a progressive rise in ideal weight in keeping with a normal                                                                                                               | Nil                                                                                                                                                                                                                                                                                       |

|                                              | Dietary Patterns                                                                                                                                                                                                                                                                                                           | Breastfeeding | Weight                                                                                                                          | Other Recommendations/Comments                                                                                                                                                                                                                                                                                                                                                    |
|----------------------------------------------|----------------------------------------------------------------------------------------------------------------------------------------------------------------------------------------------------------------------------------------------------------------------------------------------------------------------------|---------------|---------------------------------------------------------------------------------------------------------------------------------|-----------------------------------------------------------------------------------------------------------------------------------------------------------------------------------------------------------------------------------------------------------------------------------------------------------------------------------------------------------------------------------|
|                                              |                                                                                                                                                                                                                                                                                                                            |               | pregnancy, with a total increase of 7 kg during the first 30 weeks of pregnancy.                                                |                                                                                                                                                                                                                                                                                                                                                                                   |
| Villa et al. (2007)<br>Italy [144]           | It is important not to place dietary restrictions but recommend a generous protein intake instead.                                                                                                                                                                                                                         | Not reported  | Dry weight gain of 0.5 kg every 10-15 days was observed. Dry weight was hypothesized and adjusted during pregnancy progression. | Nil                                                                                                                                                                                                                                                                                                                                                                               |
| Racette (1997)<br>British Columbia [145]     | Not reported                                                                                                                                                                                                                                                                                                               | Not reported  | Not reported                                                                                                                    | Nil                                                                                                                                                                                                                                                                                                                                                                               |
| Molaison et al. (2003)<br>United States [89] | The majority of the patient's protein intake should be from high biological value sources to maintain appropriate BUN levels. The patient had a tendency to eat more protein than the meal pattern allowed. Limit high-calorie, low-nutrient foods to help meet nutritional needs and prevent excessive weight gain [246]. | Not reported  | Not reported                                                                                                                    | Folic acid (1.8 mg/day) is recommended.                                                                                                                                                                                                                                                                                                                                           |
| Stover (2004)<br>United States [126]         | Liberalised intake of potassium, phosphorous, sodium, and fluid is recommended with more dialysis time.                                                                                                                                                                                                                    | Not reported  | Not reported                                                                                                                    | Renal vitamin preparations and added minerals (minimum 2 mg/day folic acid and 15 mg/day zinc), and IV vitamin D analogues (unclear if harmful to foetus) have been recommended. Supplement calcium as needed to keep serum calcium/phosphorous levels within normal limits (2 g/day has been suggested when a 2.5 mEq/L dialysate is used). Oral or IV iron is also recommended. |

|                                                    | <b>Dietary Patterns</b>                                                                                                                                                            | <b>Breastfeeding</b>                                                                                                                                       | <b>Weight</b>                                                                                                                                                                | <b>Other Recommendations/Comments</b>                                                                                                                                                                                                                                                                                                                                          |
|----------------------------------------------------|------------------------------------------------------------------------------------------------------------------------------------------------------------------------------------|------------------------------------------------------------------------------------------------------------------------------------------------------------|------------------------------------------------------------------------------------------------------------------------------------------------------------------------------|--------------------------------------------------------------------------------------------------------------------------------------------------------------------------------------------------------------------------------------------------------------------------------------------------------------------------------------------------------------------------------|
| Unzelman et al. (1973)<br>United States [147]      | Salt intake was unrestricted. High biological value protein is recommended.                                                                                                        | Not reported                                                                                                                                               | Not reported                                                                                                                                                                 | Intermittent rest and decreased activities is recommended.                                                                                                                                                                                                                                                                                                                     |
| Perry (1994)<br>United States [148]                | A no added salt diet was prescribed.                                                                                                                                               | Not reported                                                                                                                                               | Estimated dry weight was increased by approximately 1 lb/week in the 2nd trimester, and then 1.5-2 lb/week in the 3rd trimester.                                             | Nil                                                                                                                                                                                                                                                                                                                                                                            |
| Sivasuthan et al. (2013)<br>Australia [149]        | Not reported                                                                                                                                                                       | Not reported                                                                                                                                               | A weight gain of 0.25 kg/week till 20 weeks of gestation occurred. Dry weight was assessed at each dialysis session (case 2). Review weight and monitor blood volume weekly. | Dietitian to review protein intake/status regularly. Folate (5 mg/day), vitamin B1 daily, vitamin D (1,000 IU/day), and calcitriol (adjust according to phosphate and calcium) is recommended during HD and PD. IV iron to maintain transferrin saturation >25% and ensuring that phosphate binders and active vitamin D are adjusted as needed (during HD) is also suggested. |
| <b>Editorials</b>                                  |                                                                                                                                                                                    |                                                                                                                                                            |                                                                                                                                                                              |                                                                                                                                                                                                                                                                                                                                                                                |
| Levy et al. (1998)<br>United States & France [120] | Increased dialysis time allows for a more liberal diet and protein intake, and thus an overall improved nutritional state. It is important to ensure adequate calorie supply [12]. | Not reported                                                                                                                                               | Not reported                                                                                                                                                                 | Hydro-soluble vitamins and zinc. Correct anaemia using iron and folic acid. Prevent hypocalcaemia using oral calcium carbonate: however, avoid HD induced hypercalcaemia. Prevent hypomagnesaemia with appropriate dialysis bath and eventual oral supplementation [12].                                                                                                       |
| Mercadal & Nizard (2019)<br>France [150]           | Not reported                                                                                                                                                                       | Breastfeeding is negatively impacted by ultrafiltration but is not contraindicated unless new treatments/medications are needed that are incompatible with | Weight gain of ~1 kg/month is to be expected. Regular re-evaluation of weight is necessary.                                                                                  | Folic acid (5 mg/day), hydro-soluble vitamins, iron, phosphate, and magnesium (as required).                                                                                                                                                                                                                                                                                   |

| Dietary Patterns                        | Breastfeeding                                                                       | Weight                                                                                                                                                                                                                                                                                                                                          | Other Recommendations/Comments                                                                                                                                                                                                                                                                                                                                                    |
|-----------------------------------------|-------------------------------------------------------------------------------------|-------------------------------------------------------------------------------------------------------------------------------------------------------------------------------------------------------------------------------------------------------------------------------------------------------------------------------------------------|-----------------------------------------------------------------------------------------------------------------------------------------------------------------------------------------------------------------------------------------------------------------------------------------------------------------------------------------------------------------------------------|
|                                         | breastfeeding. Probably, the best test of breast milk quality is the baby's growth. |                                                                                                                                                                                                                                                                                                                                                 |                                                                                                                                                                                                                                                                                                                                                                                   |
| Hou (2002)<br>United States [151]       | Not reported                                                                        | Recommended weight gain for women of IBW who become pregnant is 11.5-16 kg (only 1.6 kg of this weight gain occurs in the 1st trimester). In early pregnancy the change in the dry weight should be 0.9-2.3 kg depending on the pre-pregnancy BMI. Weight gain in the 2nd/3rd trimesters is 0.3-0.5 kg/week depending on the pre-pregnancy BMI. | Doses water-vitamins should be raised 3-4-fold (especially folic acid) [247]. Iron can be given as IV sodium ferric gluconate.                                                                                                                                                                                                                                                    |
| Ellis (2012)<br>United Kingdom [152]    | Not reported                                                                        | Weight gain of 1-1.5 kg in the 1st trimester is expected, increasing to ~0.45 kg per week during the 2nd/3rd trimesters. Careful monitoring of foetal growth in the 3rd trimester by the use of serial ultrasounds may be advisable in order to help prevent excessive fluid removal [153].                                                     | Oral supplementation of phosphate in the case of hypophosphataemia [51]. Iron requirements increase throughout pregnancy, especially in the 3rd trimester. Other issues which increase the anaemia of pregnancy (including inadequate erythropoiesis, folic acid deficiency, inflammatory processes, and hyperparathyroidism) contribute to making management more complex [248]. |
| Jagielski (2015)<br>United States [154] | Not reported                                                                        | Not reported                                                                                                                                                                                                                                                                                                                                    | Supplementation of vitamins A or E is not recommended therefore a generic prenatal vitamin should not be considered as a viable vitamin supplement for pregnant dialysis patients. Two vitamin supplements that most closely meet the suggested requirements and are also cost-                                                                                                   |

| Dietary Patterns                               | Breastfeeding                                                                                                                                     | Weight                                                                                                                                                                                                                                                                                                                                                                               | Other Recommendations/Comments                                                                                                                                                                                                                                                                                                                                                                                                                                                                                                                    |
|------------------------------------------------|---------------------------------------------------------------------------------------------------------------------------------------------------|--------------------------------------------------------------------------------------------------------------------------------------------------------------------------------------------------------------------------------------------------------------------------------------------------------------------------------------------------------------------------------------|---------------------------------------------------------------------------------------------------------------------------------------------------------------------------------------------------------------------------------------------------------------------------------------------------------------------------------------------------------------------------------------------------------------------------------------------------------------------------------------------------------------------------------------------------|
|                                                |                                                                                                                                                   |                                                                                                                                                                                                                                                                                                                                                                                      | <p>effective include Nephro-Vite Rx and Rena-Vite Rx (2 pills/day) (it is more economical to add vitamin D separately). Vitamin C and zinc may also need to be assessed and require additional nutrition education to ensure adequate levels are being met.</p>                                                                                                                                                                                                                                                                                   |
|                                                |                                                                                                                                                   |                                                                                                                                                                                                                                                                                                                                                                                      | <p>Referral assistance should be provided to patients with low socioeconomic status to ensure access to foods and supplements that meet increased protein and calorie needs. Consider providing patients with a local and regional resource list for food and supplemental programs that are available in their community.</p>                                                                                                                                                                                                                    |
| <b>Book Chapters</b>                           |                                                                                                                                                   |                                                                                                                                                                                                                                                                                                                                                                                      |                                                                                                                                                                                                                                                                                                                                                                                                                                                                                                                                                   |
| <p>Lawrence (2012)<br/>United States [156]</p> | <p>Hypertension in pregnant women with kidney disease should be managed by dietary control of fluid intake and fluid removal during dialysis.</p> | <p>The choice to breastfeed is up to the mother. There are no contraindications to breastfeeding for women with CKD, provided their health is otherwise stable [249]. If a mother chooses to breastfeed, her requirements during lactation would be ~330 kcal higher than the weight-maintenance needs of her non-pregnant counterpart during the first 6 months postpartum, and</p> | <p>Dry weight should be used for BMI calculation.</p> <p>Water-soluble renal vitamins (dosage double typical non-pregnancy dosage), vitamin D, calcium, folic acid, iron, and zinc (15 mg/dL) are recommended [53]. Oral iron supplements for mild anaemia or IV iron sucrose/gluconate if oral supplements are ineffective [182]. Note that the use of IV iron preparations may result in increased absorption by the foetus with subsequent acute iron toxicity, so this route of administration is to be used conservatively and monitored</p> |

| Dietary Patterns                     | Breastfeeding                                                                                                                                                                                                      | Weight       | Other Recommendations/Comments                                                                                                                                                                                                                                                                                                                                                                                                                                                                                                                                                                                                                                                                                                                                 |
|--------------------------------------|--------------------------------------------------------------------------------------------------------------------------------------------------------------------------------------------------------------------|--------------|----------------------------------------------------------------------------------------------------------------------------------------------------------------------------------------------------------------------------------------------------------------------------------------------------------------------------------------------------------------------------------------------------------------------------------------------------------------------------------------------------------------------------------------------------------------------------------------------------------------------------------------------------------------------------------------------------------------------------------------------------------------|
|                                      | <p>approximately 400 kcal higher during the second 6 months postpartum [250].</p> <p>Fluid intake should be appropriate to support milk production: however, monitoring of fluid retention status is required.</p> |              | <p>carefully [22].</p> <p>Nutrition-related values that must be monitored include blood pressure, blood urea nitrogen, albumin, casual plasma glucose, HgA1c (in patients with diabetes mellitus), and serum cholesterol [157,249]. Serum nutrients that must be monitored include potassium, phosphorus, calcium, sodium, and iron [157].</p> <p>Anthropometrics that should be evaluated include weight, fluid retention status, and intradialytic fluid gains (HD). Other conditions associated with pregnancy itself may warrant adaptations to the nutrition prescription (e.g. Intractable hyperemesis gravidarum where the addition of IDPN has been used successfully to improve the medical outcomes in acutely ill patients on HD) [88,251,252].</p> |
| Flecha (2020)<br>United States [159] | Not reported                                                                                                                                                                                                       | Not reported | <p>RDAs for supplementation in pregnant dialysing women: Vitamin C (85 mg), thiamin (1.4 mg), riboflavin (1.4 mg), niacin (18 mg), vitamin B6 (1.9 mg), folate (600 mcg), vitamin B12 (2.6 mcg), zinc (11 mg), calcium (1,000 mg), iron (27 mg), phosphorous (700 mg), iodine (220 mcg).</p> <p>RDAs for supplementation in lactating dialysing women: Vitamin C (12 mg), thiamin (1.4 mg), riboflavin (1.6 mg), niacin (17 mg), vitamin B6</p>                                                                                                                                                                                                                                                                                                                |

| Dietary Patterns                   | Breastfeeding | Weight       | Other Recommendations/Comments                                                                                                                                                                                                                                                                                                                                                                                                                                                                                                                                                                                                            |
|------------------------------------|---------------|--------------|-------------------------------------------------------------------------------------------------------------------------------------------------------------------------------------------------------------------------------------------------------------------------------------------------------------------------------------------------------------------------------------------------------------------------------------------------------------------------------------------------------------------------------------------------------------------------------------------------------------------------------------------|
|                                    |               |              | <p>(2 mg), folate (500 mcg), vitamin B12 (2.8 mcg), zinc (12 mg), calcium (1,000 mg), iron (9 mg), phosphorous (700 mg), iodine (290 mcg).</p> <p>Tolerable maximum supplement doses for pregnant and lactating dialysing women: Vitamin C (2,000 mg), niacin (35 mg), vitamin B6 (100 mg), folate (1,000 mcg), zinc (40 mg), calcium (2,500 mg), iron (45 mg), phosphorous (4,000 mg), iodine (110 mcg). Oral calcium carbonate should be administered in cases of hypocalcaemia. Hypocalcaemia should be avoided by giving 1-2g of supplementary calcium/day.</p>                                                                       |
| Pahl (2019)<br>United States [160] | Not reported  | Not reported | <p>1st trimester: Weight gain of 1-1.5 kg.<br/>2nd/3rd trimesters: Weight gain 0.5 kg/week.</p> <p>Parenteral iron (as required), water-soluble vitamins/minerals, active vitamin D preparations, multivitamins, folic acid (2-5 mg/day), occasionally additional B-complex, and trace mineral elements are recommended [117,253]. Supplement phosphorous as required (in treatment of hypophosphatemia). Where hypercalcaemia is not present, hold Cinacalcet and manage mineral-bone disease with binders and active vitamin D preparations (not enough information is available around the safety of Cinacalcet during pregnancy).</p> |

|                                             | Dietary Patterns                                                                           | Breastfeeding                                                                                                                                                | Weight                                                                                                                                                                                                                                                                                                                          | Other Recommendations/Comments                                                                                                                                                                                                                                                                                                                                                                                                                                                                                                         |
|---------------------------------------------|--------------------------------------------------------------------------------------------|--------------------------------------------------------------------------------------------------------------------------------------------------------------|---------------------------------------------------------------------------------------------------------------------------------------------------------------------------------------------------------------------------------------------------------------------------------------------------------------------------------|----------------------------------------------------------------------------------------------------------------------------------------------------------------------------------------------------------------------------------------------------------------------------------------------------------------------------------------------------------------------------------------------------------------------------------------------------------------------------------------------------------------------------------------|
| Sandhu (2016)<br>United States [161]        | Not reported                                                                               | Breast milk in patients with ESRD will have high concentrations of urea, and in cases of breastfeeding it can lead to osmotic diuresis in infants [127,236]. | Minimum weight gain of 1-1.5 kg in the 1st trimester and 0.45-1 kg/week thereafter [15]. Estimated dry weight should be increased to 400 g/week after the 1st trimester to account for foetal weight of ~500 mg/week in the 2nd/3rd trimesters [237]. A pregnant woman with a normal BMI should gain a total of 11-15 kg [127]. | Increase doses of potassium supplements and iron. Multivitamins, folic acid, and an additional 30g of calcium supplementation is recommended [238]. Phosphate binders are usually discontinued in HD, but phosphate replacement might be needed in PD [127,236].                                                                                                                                                                                                                                                                       |
| Hou (1994)<br>United States [254]           | Daily dialysis allows for a more liberal diet.                                             | Not reported                                                                                                                                                 | It is difficult to prescribe a specific weight gain for pregnant dialysis patients. Weekly physical examination to evaluate volume status is recommended (dialysis fluid removal should be adjusted accordingly).                                                                                                               | In a patient dialysed with a bath containing 2.5 mmol/L calcium, prescribe 1-2 g/day additional calcium in the form of calcium carbonate (above what is contained in phosphate binders). Measure 1,25(OH <sub>2</sub> )D <sub>3</sub> levels each trimester and supplement if low. Folate (1 mg/day above usual supplement), zinc (15 mg/day), water-soluble vitamins (increase standard renal supplement dose rather than prenatal vitamins as they carry the risk of vitamin A toxicity), and IV iron (as required) are recommended. |
| Fisher et al. (2018)<br>United States [162] | Continuous fluid removal avoids hypotension and allows more liberal diet and fluid intake. | Not reported                                                                                                                                                 | 1st trimester: Weight gain is normally only 1-2kg and thus the post-dialysis weight varies only slightly.<br>2nd/3rd trimesters: Weight gain is 0.3-0.5 kg/week [255].                                                                                                                                                          | Water-soluble vitamins, folate, zinc, and iron (oral or IV with iron sucrose) are recommended [22]. Standard prenatal vitamins (which may contain excess vitamin A) are best avoided.                                                                                                                                                                                                                                                                                                                                                  |
| Stover (2008)<br>United States [163]        | Sodium, potassium, and phosphorus can often be                                             | Not reported                                                                                                                                                 | During the 2nd/3rd trimesters (when most weight gain occurs) the pregnant dialysis patient's                                                                                                                                                                                                                                    | Doubling a standard renal vitamin should provide adequate folate and other water-                                                                                                                                                                                                                                                                                                                                                                                                                                                      |



| Dietary Patterns                            | Breastfeeding | Weight                                                     | Other Recommendations/Comments                                                                                                                                                                                                                                                                                                                                                                                                                                                                                                                                                                                                                                                                                                                                                                                                                                                                                                                                                                                                                                                                                                                                                                                                                    |
|---------------------------------------------|---------------|------------------------------------------------------------|---------------------------------------------------------------------------------------------------------------------------------------------------------------------------------------------------------------------------------------------------------------------------------------------------------------------------------------------------------------------------------------------------------------------------------------------------------------------------------------------------------------------------------------------------------------------------------------------------------------------------------------------------------------------------------------------------------------------------------------------------------------------------------------------------------------------------------------------------------------------------------------------------------------------------------------------------------------------------------------------------------------------------------------------------------------------------------------------------------------------------------------------------------------------------------------------------------------------------------------------------|
| liberalised in the diet with more dialysis. |               | estimated dry weight should increase by 0.5 kg/week [151]. | soluble vitamins needed during pregnancy. Vitamin D analogues have been given but not enough information on safety during pregnancy. Vitamin A is not usually given thus renal vitamins are generally given instead of prenatal vitamins. IV iron sucrose/gluconate is prescribed to achieve iron studies in goal range for general dialysis population (oral iron has been used but is not as well absorbed). Calcium can be given as calcium acetate or carbonate to bind phosphorus, or as calcium carbonate for a calcium supplement. Keep in mind that there is increased absorption of calcium from dialysate with more frequent dialysis, and phosphate binders may not be needed. Presently there are renal vitamin preparations already containing >1 mg of folic acid with adequate amounts of other water-soluble vitamins and even added zinc; these may be utilized as well. May need a nutritional supplement to meet energy/protein needs. It is recommended that the dietitian meet with the patient to discuss an overview of nutritional needs as soon as possible after the pregnancy is confirmed and she has agreed to follow through with it. Weekly follow-up using dietary recalls and/or food intake records to evaluate |

|                                      | Dietary Patterns                                                                                                                                                          | Breastfeeding                                                                                                                                                                                                                                                                                                                                                             | Weight                                                                                                                      | Other Recommendations/Comments                                                                                                                                                                                                                                                                                                                                                                                                                                                                                                                                                                                                                                                                                                                                                                                                                                                                                                                                                                                                                                                                                                                                                                                                                                                                    |
|--------------------------------------|---------------------------------------------------------------------------------------------------------------------------------------------------------------------------|---------------------------------------------------------------------------------------------------------------------------------------------------------------------------------------------------------------------------------------------------------------------------------------------------------------------------------------------------------------------------|-----------------------------------------------------------------------------------------------------------------------------|---------------------------------------------------------------------------------------------------------------------------------------------------------------------------------------------------------------------------------------------------------------------------------------------------------------------------------------------------------------------------------------------------------------------------------------------------------------------------------------------------------------------------------------------------------------------------------------------------------------------------------------------------------------------------------------------------------------------------------------------------------------------------------------------------------------------------------------------------------------------------------------------------------------------------------------------------------------------------------------------------------------------------------------------------------------------------------------------------------------------------------------------------------------------------------------------------------------------------------------------------------------------------------------------------|
| Stover (2014)<br>United States [164] | It may be easier to meet dietary needs with liberalisation of sodium, potassium, and phosphorus content due to the increased amount of solute removal with more dialysis. | The literature is scarce regarding the safety of breastfeeding an infant born to a mother with CKD. The question is whether the breast milk content will be high in urea and cause a diuresis in the infant that must be supplemented with extra water. Most women who plan to breastfeed decide not to once the infant is born (as the pregnancy has been so difficult). | During 2nd/3rd trimesters (when most weight gain occurs) the estimated dry weight should be increased by 0.5 kg/week [179]. | nutrition adequacy is suggested [10]<br>Water-soluble vitamins are preferred over prenatal vitamins (due to the need to avoid excess vitamin A). Doubling a standard renal vitamin (containing 1 mg folic acid) is generally advised to meet folic acid needs. IV vitamin D analogues have been given for women needing suppression of the PTH and to maintain normal serum levels of calcium. IV iron sucrose/gluconate is recommended (oral iron has been used but is not as well absorbed) [182]. In later stages of pregnancy when anaemia is worse, 80-90 % of IV iron may be deposited in the foetus, therefore no more than 62.5-100 mg (depending on the iron preparation used) should be given at one time [24]. Zinc (minimum 15 mg/day) is recommended [10,89]. Calcium-containing phosphate binders are generally given to the pregnant dialysis patient due to increased calcium needs of the foetus. There are no studies to evaluate the safety of using calcium acetate or calcium carbonate during pregnancy however these preparations have been utilized during this time [89,182,256]. They may be given with meals for phosphate binding (though serum phosphorus levels are often low due to intensive dialysis), or apart from meals primarily for calcium supplementation |

| Dietary Patterns                                             | Breastfeeding                                                                                                                                                                              | Weight                                                                                                                                                                                                                                                                                                                                                                                                                                                | Other Recommendations/Comments                                                                                                                                                                                                                                                                                                                                                                                                                                                                                                                                                                                                                                                                                                                                                                                                                                                                                                                                                                                                   |
|--------------------------------------------------------------|--------------------------------------------------------------------------------------------------------------------------------------------------------------------------------------------|-------------------------------------------------------------------------------------------------------------------------------------------------------------------------------------------------------------------------------------------------------------------------------------------------------------------------------------------------------------------------------------------------------------------------------------------------------|----------------------------------------------------------------------------------------------------------------------------------------------------------------------------------------------------------------------------------------------------------------------------------------------------------------------------------------------------------------------------------------------------------------------------------------------------------------------------------------------------------------------------------------------------------------------------------------------------------------------------------------------------------------------------------------------------------------------------------------------------------------------------------------------------------------------------------------------------------------------------------------------------------------------------------------------------------------------------------------------------------------------------------|
|                                                              |                                                                                                                                                                                            |                                                                                                                                                                                                                                                                                                                                                                                                                                                       | <p>and if the serum phosphorus level is below goal range.</p> <p>Patients may need a nutritional supplement to meet energy/protein needs (commercial supplements may be used with increased dialysis time and more solute removal). Weekly follow-up using dietary recalls and/or food intake records to evaluate nutrition adequacy is suggested [10].</p>                                                                                                                                                                                                                                                                                                                                                                                                                                                                                                                                                                                                                                                                      |
| <p>Stover &amp; Trolinger (2020)<br/>United States [167]</p> | <p>It may be easier to meet increased dietary needs with liberalisation of sodium, potassium, and phosphorus content due to the increased amount of solute removal with more dialysis.</p> | <p>The literature is scarce regarding the safety of breastfeeding an infant born to a mother with CKD. The question is whether the breast milk content will be high in urea and cause a diuresis in the infant that must be supplemented with extra water. Most women who plan to breastfeed decide not to once the infant is born (as the pregnancy has been so difficult). Women who choose to breast feed require an extra 500 kcal/day [168].</p> | <p>Estimated dry weight or target weight should be increased by 0.5 kg/week during the 2nd/3rd trimesters (when most weight gain occurs) [257].</p> <p>A regular commercial supplement may be used with increased dialysis time and more solute removal. Water-soluble vitamins are usually preferred over prenatal vitamins due to the need to avoid excess vitamin A. A standard renal vitamin containing 1 mg folic acid is often doubled. There are renal vitamin preparations already containing &gt;1 mg folic acid and even added zinc, and these may also be used as long as they contain recommended amounts of other water-soluble vitamins needed during pregnancy. Vitamin D analogues have been given intravenously during dialysis to pregnant women needing suppression of the PTH and to maintain normal serum levels of calcium. There still does not seem to be definitive information available concerning whether these forms of vitamin D cross the placental barrier and, if so, whether they are safe</p> |

| Dietary Patterns                        | Breastfeeding                                                                                                                                       | Weight                                                                             | Other Recommendations/Comments                                                                                                                                                                                                                                                                                                                                                                                                                                                                                                                                                                                                                                                                                                                                                                                                                |
|-----------------------------------------|-----------------------------------------------------------------------------------------------------------------------------------------------------|------------------------------------------------------------------------------------|-----------------------------------------------------------------------------------------------------------------------------------------------------------------------------------------------------------------------------------------------------------------------------------------------------------------------------------------------------------------------------------------------------------------------------------------------------------------------------------------------------------------------------------------------------------------------------------------------------------------------------------------------------------------------------------------------------------------------------------------------------------------------------------------------------------------------------------------------|
|                                         |                                                                                                                                                     |                                                                                    | <p>relative to foetal development [97,182,258]. It may be beneficial to provide supplements of 25(OH)D as it does cross the placental barrier and can be utilized by the foetus [259,260]. IV iron sucrose [182] or oral iron may be used (although oral iron is not as well absorbed). Zinc is recommended (15 mg/day (included in prenatal vitamins and in some renal vitamins, or it is provided as an added supplement) [10,212].</p> <p>Calcium-containing phosphate binders are generally given to the pregnant dialysis patient if needed. Sometimes serum phosphorus levels are less than goal range, in these instances calcium supplements in the form of calcium carbonate are given between meals and phosphate supplements are prescribed if needed. Patients may need nutritional a supplement to meet energy/protein needs</p> |
| Plant (2008)<br>United Kingdom<br>[169] | More frequent dialysis allows for a reduction/ removal of the dietary and fluid restrictions that are standard with less intense regimens [15,117]. | Not reported                                                                       | <p>An adequately nourished woman can be expected to gain 1.0-1.5 kg in the 1st trimester. Subsequent weight gain of ~0.45 kg/week occurs until delivery [15] (although it may be much more variable in individual women) [117].</p> <p>Water-soluble vitamins (especially folic acid) need generous supplementation due to intensive regimens. Many protocols also incorporate supplementation of trace minerals and parenteral iron (due to increased losses in HD and poor oral absorption) [70].</p>                                                                                                                                                                                                                                                                                                                                       |
| Stover (2022)<br>United States [170]    | Potentially liberalise dietary potassium, phosphorous,                                                                                              | The literature around breastfeeding safety for infants born to mothers with CKD is | Expect a weight gain of 1.6 kg in the 1st trimester and                                                                                                                                                                                                                                                                                                                                                                                                                                                                                                                                                                                                                                                                                                                                                                                       |
|                                         |                                                                                                                                                     |                                                                                    | Cinacalcet and Etelcalcetide are not recommended for elevated PTH due to lack of information regarding its use                                                                                                                                                                                                                                                                                                                                                                                                                                                                                                                                                                                                                                                                                                                                |

|                                                  | <b>Dietary Patterns</b>                                | <b>Breastfeeding</b>                                                                                                                                                                                                                                                                                                                                                                 | <b>Weight</b>                                                                                                                                                                | <b>Other Recommendations/Comments</b>                                                                                                                                                                                                                                                                                                                                                                                                                                                                                                                                                                                                                                                                                                                                                                                                                                                                                                                                                     |
|--------------------------------------------------|--------------------------------------------------------|--------------------------------------------------------------------------------------------------------------------------------------------------------------------------------------------------------------------------------------------------------------------------------------------------------------------------------------------------------------------------------------|------------------------------------------------------------------------------------------------------------------------------------------------------------------------------|-------------------------------------------------------------------------------------------------------------------------------------------------------------------------------------------------------------------------------------------------------------------------------------------------------------------------------------------------------------------------------------------------------------------------------------------------------------------------------------------------------------------------------------------------------------------------------------------------------------------------------------------------------------------------------------------------------------------------------------------------------------------------------------------------------------------------------------------------------------------------------------------------------------------------------------------------------------------------------------------|
|                                                  | sodium, and fluid intake with more intensive dialysis. | scarce. The question is whether the breast milk content will be high in urea for those in later stages of CKD and those back on regular dialysis schedules. High urea concentration could cause diuresis in the infant that must be supplemented with extra water. Most women who plan to breastfeed decide not to once the infant is born (as the pregnancy has been so difficult). | 0.3-0.5 kg/week weight gain in the 2nd/3rd trimesters [47]. Weights are dependent on energy/protein intake and volume status and must be evaluated based on a team approach. | during pregnancy. IV vitamin D analogues have been used for women needing suppression of PTH and maintenance of normal serum calcium levels, but there is no definitive information available regarding these crossing the placental barrier or foetal safety [97,182]. Supplemental 25 hydroxyvitamin D is a consideration (crosses the placental barrier and may be utilised by the foetus) [259,260]. Supplement calcium as needed to keep serum calcium/phosphorous levels within normal limits. IV iron sucrose [258] to maintain serum ferritin and transferrin saturation within goals is recommended, although some physicians prefer oral iron alone or included in vitamin preparations. The mother may require protein or calorie/protein supplements to attain her estimated energy and protein requirements. Doubled dosage of a standard renal multivitamin (some renal vitamins with >1 mg folate may be appropriate) and zinc supplementation is also suggested [10,212]. |
| Goody & Umans (2004)<br>The Netherlands<br>[171] | Not reported                                           | Not reported                                                                                                                                                                                                                                                                                                                                                                         | Increase estimated dry weight by 0.5-1.0 kg/month during the first 6 months and by 0.25-0.5 kg/week during the last trimester, with close monitoring of blood pressure (HD). | IV iron (in 100-200 mg doses to limit placental transfer) titrated to keep transferrin saturation > 15% is recommended. Monitor serum phosphate weekly and decrease oral binders, or supplement phosphorus                                                                                                                                                                                                                                                                                                                                                                                                                                                                                                                                                                                                                                                                                                                                                                                |

|                                                    | Dietary Patterns                                                                        | Breastfeeding | Weight                                                                                                                                                   | Other Recommendations/Comments                                                                                                                                                                                                                                                                                                                                                                                                                                                                                                                                                                                                                                                                                                                        |
|----------------------------------------------------|-----------------------------------------------------------------------------------------|---------------|----------------------------------------------------------------------------------------------------------------------------------------------------------|-------------------------------------------------------------------------------------------------------------------------------------------------------------------------------------------------------------------------------------------------------------------------------------------------------------------------------------------------------------------------------------------------------------------------------------------------------------------------------------------------------------------------------------------------------------------------------------------------------------------------------------------------------------------------------------------------------------------------------------------------------|
|                                                    |                                                                                         |               |                                                                                                                                                          | during dialysis if low. Double folate supplementation (~2 mg/day) and increase water-soluble vitamins. Given placental vitamin D hydroxylation there is usually adequate calcium absorption with use of calcium-containing phosphate binders to support foetal skeletal growth (HD) [11,261,262]. For these same reasons oral or parenteral vitamin analogues are usually held, and phosphate binder doses may be decreased, then both adjusted based on results of frequent serum chemistries. Changes may be so profound that some patients may benefit from intradialytic phosphorus supplementation (HD) [263]. Nutrition should be optimised before conception and intensive nutritional counselling is usually required during pregnancy [182]. |
| Vellanki & Hou (2019) United States [172]          | An unrestricted diet is recommended.                                                    | Not reported  | Dry weight can be difficult to ascertain as weight usually increases by 0.5 kg/week in the 3rd trimester.                                                | Double dose of water-soluble vitamins, folic acid (4 mg/day), and IV iron.                                                                                                                                                                                                                                                                                                                                                                                                                                                                                                                                                                                                                                                                            |
| Shahid et al. (2018) United Kingdom & Canada [173] | An unrestricted, phosphate-rich diet (to avoid hypophosphataemia) is recommended [253]. | Not reported  | An adequately nourished woman can be expected to gain 1-1.5 kg in the 1st trimester with a subsequent weight gain of ~0.5 kg/week until delivery. Target | HD: Double dose of multivitamin, water-soluble vitamins, minerals, folic acid (5 mg/day), and oral or IV iron (to maintain normal stores; patients usually need a >30-50% increase in IV iron dosing as there is an estimated                                                                                                                                                                                                                                                                                                                                                                                                                                                                                                                         |

| Dietary Patterns                  | Breastfeeding | Weight                                                                                                                                                                                                                                                                                                                                                                              | Other Recommendations/Comments                                                                                                                                                                                                                                                                                                                                                                                                                                                                                                                                                                                                                                                                                                                                                                                                                                                                                                                                                                                                                                                         |
|-----------------------------------|---------------|-------------------------------------------------------------------------------------------------------------------------------------------------------------------------------------------------------------------------------------------------------------------------------------------------------------------------------------------------------------------------------------|----------------------------------------------------------------------------------------------------------------------------------------------------------------------------------------------------------------------------------------------------------------------------------------------------------------------------------------------------------------------------------------------------------------------------------------------------------------------------------------------------------------------------------------------------------------------------------------------------------------------------------------------------------------------------------------------------------------------------------------------------------------------------------------------------------------------------------------------------------------------------------------------------------------------------------------------------------------------------------------------------------------------------------------------------------------------------------------|
|                                   |               | post-dialysis dry weight needs to be adjusted regularly [253].                                                                                                                                                                                                                                                                                                                      | 1-3g yearly loss of iron on HD). Cessation of phosphate binders (to avoid hypophosphataemia) is also suggested [253].                                                                                                                                                                                                                                                                                                                                                                                                                                                                                                                                                                                                                                                                                                                                                                                                                                                                                                                                                                  |
| Piccoli et al. (2023) Italy [174] | Not reported  | A weight gain of ~1 kg/month in the 1st/2nd trimesters and up to 2 kg/month (500 g/week) in the 3rd trimester is usually taken as a reference. However, this rule of thumb has to be adapted to each individual case and establishing the 'dry weight' derives from an individualised assessment of diet, weight gain, dry weight, blood pressure, and utero-placental blood flows. | Oral iron is often not sufficient to compensate for increased needs. IV iron (targeted at transferrin saturation levels >20%) has been given to pregnant dialysis patients without adverse events however in the later stages of pregnancy up to 80%-90% of parenteral iron may deposit in the foetus therefore it should be administered in small doses. Folate and vitamin B12 should be monitored and supplemented as necessary (at doses adjusted upon blood levels). Vitamin D needs may be increased because of placental 25-hydroxy-vitamin D3 conversion, therefore, vitamin D supplementation should be guided by blood levels and calcium/phosphate balance. Calcium supplements or calcium-based binders are safe; however, their use may not be needed if high dialysis efficiency is used. Sevelamer should not be used in pregnancy. Supplementation of phosphate/potassium/magnesium as needed is recommended. Water-soluble vitamins, zinc, and copper should be measured and supplemented, with dose adjustments based on blood levels. Nutritional consultations are |

| Dietary Patterns | Breastfeeding | Weight | Other Recommendations/Comments                                                                                                                                                                                    |
|------------------|---------------|--------|-------------------------------------------------------------------------------------------------------------------------------------------------------------------------------------------------------------------|
|                  |               |        | important and should be provided whenever possible taking into account the profound changes that are required from the usual restrictive dietary policy to an unrestricted one (especially on extended-hours HD). |

Abbreviations: HD, haemodialysis; CKD, chronic kidney disease; IV, intravenous; PD, peritoneal dialysis; PTH, parathyroid hormone; ALP, alkaline phosphatase; BMI, body mass index; TPN, total parenteral nutrition; IDPN, interdialytic parenteral nutrition; CHO, carbohydrate(s); GI, glycaemic index; ESRD, end-stage renal disease; RRT, renal replacement therapy; sHPT, secondary hyperparathyroidism; pHPT, primary hyperparathyroidism; CAPD, continuous ambulatory peritoneal dialysis; BUN, blood urea nitrogen; WHO, World Health Organization; IBW, ideal body weight; RDAs, recommended dietary allowances.

Supplementary Table S7. Summary of included case reports/case series.

| Author(s)<br>Location                        | Aetiology of Kidney Disease                                                                                                                | No. of Subjects | Maternal Age*                                | Dialysis Commencement † | Dialysis Regimen                                                             | Pregnancy Term ‡                                         | Supplementation                                                                                                                                                                                                              |
|----------------------------------------------|--------------------------------------------------------------------------------------------------------------------------------------------|-----------------|----------------------------------------------|-------------------------|------------------------------------------------------------------------------|----------------------------------------------------------|------------------------------------------------------------------------------------------------------------------------------------------------------------------------------------------------------------------------------|
| Lim et al. (2017)<br>Malaysia [72]           | IgA nephropathy                                                                                                                            | 1               | 42                                           | Before                  | CAPD: 4x2L exchanges/day, 1.5% bags for each exchange, daily UF 500-1,500 mL | 36                                                       | Ferrous fumarate (200 mg/day), folic acid (5 mg/day), vitamin b complex (1 tablet 1x/day), calcium carbonate 1g (3x/day).                                                                                                    |
| Sulaiman et al. (2014)<br>United States [73] | Diabetic nephropathy/ extensive cocaine use (case 1); diabetic nephropathy & hypertension (cases 2, 4); uncontrolled hypertension (case 3) | 4               | 39 (cases 1,4)<br>34 (case 2)<br>38 (case 3) | During (cases 1,2,3,4)  | HD: 4 hours 6x/week (cases 1,2,3)<br>24 hours over 7 days (case 4)           | 34 (case 1)<br>27 (case 2)<br>33 (case 3)<br>29 (case 4) | Phosphate binders, vitamin D, multi-vitamin supplements, folate, prenatal vitamins (case 1); folate, prenatal vitamins (case 2); oral iron, folate, prenatal vitamins (case 3); IV iron, folate, prenatal vitamins (case 4). |
| Kondakova et al. (2023)<br>Russia [74]       | Chronic glomerulo-nephritis                                                                                                                | 1               | 31                                           | Before                  | HD: 3.5 hours 6x/week (20-24 hours/week)                                     | 37                                                       | IV iron (III) hydroxide sucrose complex (dose                                                                                                                                                                                |



| Author(s)<br>Location                       | Aetiology of Kidney<br>Disease  | No. of<br>Subjects  | Maternal<br>Age*                 | Dialysis<br>Commencement <sup>†</sup> | Dialysis<br>Regimen                                                                 | Pregnancy<br>Term <sup>‡</sup> | Supplementation                                                                                                                                                                                                                        |
|---------------------------------------------|---------------------------------|---------------------|----------------------------------|---------------------------------------|-------------------------------------------------------------------------------------|--------------------------------|----------------------------------------------------------------------------------------------------------------------------------------------------------------------------------------------------------------------------------------|
|                                             |                                 |                     |                                  |                                       |                                                                                     |                                | increased from 100-200 g/month), iodine, folic acid, ascorbic acid, calcium preparations, vitamin D.                                                                                                                                   |
| Cao et al. (2018)<br>China [75]             | Chronic glomerulo-<br>nephritis | 1                   | 34                               | Before                                | HD: 20 hours/week                                                                   | 31 + 4                         | IV iron sucrose (100 mg biweekly), folic acid (10 mg), calcitrol (0.25 mg/day),<br><br>calcium carbonate D3 (0.6 g/day).                                                                                                               |
| Arai et al. (2020)<br>Japan [76]            | IgA nephropathy                 | 1                   | 39                               | Before                                | HD: 4.5 hours 5x/week, then 6 hours 6x/week from 10 weeks gestation (36 hours/week) | 38 + 3                         | IV iron (120 mg/week); calcitriol 0.25 µg/day, precipitated calcium carbonate 1,000 mg/day, and lanthanum carbonate hydrate 1,500 mg/day were discontinued at diagnosis of pregnancy.                                                  |
| Sprenger-Mähr et al. (2019)<br>Austria [77] | Lupus nephritis                 | 2<br>(same patient) | 22<br>(case 1)<br>25<br>(case 2) | Before                                | HD: 24 hours/week (case 1)<br>4 hours 6x/week (case 2)                              | 32 (case 1)<br>36 (case 2)     | Sevelamer, no vitamin D or calcium (case 1); iron supplementation adapted as required, oral calcitriol (0.25 µg) after each dialysis session, cholecalciferol 6,000 IU/week (case 2); the patient refused oral calcium supplements, so |

| Author(s)<br>Location                    | Aetiology of Kidney<br>Disease               | No. of<br>Subjects  | Maternal<br>Age*                 | Dialysis<br>Commencement <sup>†</sup> | Dialysis<br>Regimen                                                                                   | Pregnancy<br>Term <sup>‡</sup> | Supplementation                                                                                                                                                                                                |
|------------------------------------------|----------------------------------------------|---------------------|----------------------------------|---------------------------------------|-------------------------------------------------------------------------------------------------------|--------------------------------|----------------------------------------------------------------------------------------------------------------------------------------------------------------------------------------------------------------|
|                                          |                                              |                     |                                  |                                       |                                                                                                       |                                | increasing calcium in the dialysate bath seemed a plausible alternative.                                                                                                                                       |
| Mambap et al.<br>(2023)<br>Cameroon [78] | Hepatitis B virus-related glomerulonephritis | 1                   | 29                               | Before                                | HD: 5 hours 4x/week until 34 weeks gestation, then 5 hours 5x/week (25 hours/week) until delivery     | 36 + 4                         | Native vitamin D (100,000 UI every 2 months), vitamin C (500 mg 2x/week), IV vitamin B complex (post every HD session), folic acid (5 mg/day), IV iron sucrose (100 mg/week), calcium carbonate between meals. |
| Buil et al. (2015)<br>Spain [79]         | Shönlein-Henoch disease                      | 1                   | 27                               | Before                                | HD: 3 hours 6x/week                                                                                   | 34                             | Daily oral iron until 24 weeks gestation, weekly IV iron after 24 weeks gestation.                                                                                                                             |
| Manisco et al.<br>(2015)<br>Italy [47]   | Pyelonephritis                               | 1                   | 29                               | Before                                | HD: 195 minutes 3x/week (months 1/2), 300 minutes 6x/week (months 3-8), 240 minutes 6x/week (month 9) | 36                             | Iron gluconate, oral calcium (2 g/day), folate (5 mg/day), calcitriol (0.25 µg/day), oral protein supplementation suggested to attain daily protein and caloric intakes.                                       |
| Seker (2016)<br>Turkey [80]              | Hypertensive nephrosclerosis                 | 2<br>(same patient) | 28<br>(case 1)<br>34<br>(case 2) | Before (cases 1,2)                    | HD: 5 hours 6x/week (cases 1,2)                                                                       | 32 (case 1)<br>30 (case 2)     | IV iron, calcium, folic acid (case 1); IV iron, folic acid (1mg/day), calcium (1,500 mg/day) (case 2).                                                                                                         |

| Author(s)<br>Location                             | Aetiology of Kidney<br>Disease      | No. of<br>Subjects | Maternal<br>Age* | Dialysis<br>Commencement <sup>†</sup> | Dialysis<br>Regimen                                                                                                                                                                                                                                                                                                                                                                                                                                | Pregnancy<br>Term <sup>‡</sup> | Supplementation                                                                                        |
|---------------------------------------------------|-------------------------------------|--------------------|------------------|---------------------------------------|----------------------------------------------------------------------------------------------------------------------------------------------------------------------------------------------------------------------------------------------------------------------------------------------------------------------------------------------------------------------------------------------------------------------------------------------------|--------------------------------|--------------------------------------------------------------------------------------------------------|
| Shanmugalingam<br>et al. (2021)<br>Australia [81] | Pauci-immune<br>glomerulo-nephritis | 1                  | 34               | During                                | HD: 5 hours/day<br>(22 weeks 3 days to<br>23 weeks 3 days), 6<br>hours/day (24<br>weeks 3 days), 5<br>hours/day (25<br>weeks 6 days to 26<br>weeks 6 days), 5.5<br>hours/day (27<br>weeks 6 days to 32<br>weeks 6 days), 6<br>hours/day (33<br>weeks 2 days to 37<br>weeks 1 day);<br>3x/week (22 weeks<br>3 days to 26 weeks<br>6 days), 5x/week<br>(27 weeks 6 days to<br>31 weeks 6 days),<br>6x/week (32 weeks<br>6 days to 37 weeks<br>1 day) | 37 + 1                         | Fortnightly iron<br>polymaltose infusions<br>(200 mg),<br>multivitamins,<br>calcium<br>(1,200 mg/day). |

| Author(s)<br>Location                  | Aetiology of Kidney<br>Disease                                                                                                                                                                                                                                                                                 | No. of<br>Subjects | Maternal<br>Age*                                                                 | Dialysis<br>Commencement <sup>†</sup>      | Dialysis<br>Regimen                                                                                                                              | Pregnancy<br>Term <sup>‡</sup>                                                                 | Supplementation                                                                                                                                                                                                                                                                                                                                                                                                                                                                                                                                                                                                                                                                                        |
|----------------------------------------|----------------------------------------------------------------------------------------------------------------------------------------------------------------------------------------------------------------------------------------------------------------------------------------------------------------|--------------------|----------------------------------------------------------------------------------|--------------------------------------------|--------------------------------------------------------------------------------------------------------------------------------------------------|------------------------------------------------------------------------------------------------|--------------------------------------------------------------------------------------------------------------------------------------------------------------------------------------------------------------------------------------------------------------------------------------------------------------------------------------------------------------------------------------------------------------------------------------------------------------------------------------------------------------------------------------------------------------------------------------------------------------------------------------------------------------------------------------------------------|
| Haase et al.<br>(2005)<br>Germany [82] | Focal sclerosing<br>glomerulonephritis<br>(case 1); Lignac-<br>Fanconi syndrome<br>(cystinosis) (case 2);<br>post-streptococcal<br>glomerulonephritis<br>(case 3);<br>mesangio-<br>proliferative<br>glomerulonephritis<br>(case 4); renal<br>amyloidosis due to<br>familial<br>Mediterranean fever<br>(case 5) | 5                  | 37<br>(case 1) 21<br>(case 2) 27<br>(case 3)<br>23<br>(case 4)<br>32<br>(case 5) | Before (cases 1,2,4,5);<br>during (case 3) | HD: 36 hours/week<br>(6 sessions/week)<br>(case 1); 35<br>hours/week (daily)<br>(case 2); 24<br>hours/week (6<br>sessions/week)<br>(cases 3,4,5) | 30 + 4 (case 1)<br>31 + 5 (case 2)<br>30 + 0<br>(case 3)<br>37 + 4 (case 4)<br>34 + 4 (case 5) | IV iron (sodium ferric<br>gluconate complex),<br>trace elements (Inzolen<br>infantibus, 1 ampoule<br>containing 2.5 mmol<br>magnesium, 0.015 mmol<br>zinc, 0.015 mmol<br>copper, 0.005 mmol<br>manganese, 0.0015<br>mmol<br>chromium), vitamin B12<br>(Cytobion, 1<br>ampoule containing<br>1,000 mg<br>cyanocobalamin), folate<br>(Folat-Injektapas, 1<br>ampoule containing 5<br>mg folate), vitamin B-<br>complex (Polybion N, 1<br>ampoule containing 10<br>mg Thiamin, 4 mg<br>Riboflavin,<br>40 mg Nicotinamid, 6<br>mg Dexpanthenol, 0.5<br>mg Biotin and 4 mg<br>Pyridoxin); on<br>average, 3 to 4<br>ampoules of trace<br>elements, 10 mg folate,<br>500 mg vitamin B12,<br>and 4 ampoules of |

| Author(s)<br>Location                | Aetiology of Kidney<br>Disease                                                                                                                           | No. of<br>Subjects | Maternal<br>Age*                                                                          | Dialysis<br>Commencement <sup>†</sup> | Dialysis<br>Regimen                                                                                                         | Pregnancy<br>Term <sup>‡</sup>                                          | Supplementation                                                                                                                                                                                 |
|--------------------------------------|----------------------------------------------------------------------------------------------------------------------------------------------------------|--------------------|-------------------------------------------------------------------------------------------|---------------------------------------|-----------------------------------------------------------------------------------------------------------------------------|-------------------------------------------------------------------------|-------------------------------------------------------------------------------------------------------------------------------------------------------------------------------------------------|
|                                      |                                                                                                                                                          |                    |                                                                                           |                                       |                                                                                                                             |                                                                         | vitamin B-complex were given IV/patient/week (cases 1,2,3,4,5); two patients needed oral administration of vitamin D (1,25 OH).                                                                 |
| Yu et al. (2015)<br>China [83]       | Chronic glomerulonephritis and stage-3 hypertension                                                                                                      | 1                  | 22                                                                                        | Before                                | HD: 4 hours 5x/week (~3 months), then daily (until delivery)                                                                | 34 + 4                                                                  | IV compound amino acid (250 mL), 10 % L-carnitine (20 mL), fructose diphosphate sodium (10g), folic acid/day (0.4 mg/day), polyferose 150 mg/day, multivitamins.                                |
| Espinoza et al. (2013)<br>Chile [86] | Unclear (case 1); hypertensive nephrosclerosis (case 2); lupus nephropathy (cases 3, 5); chronic glomerulonephritis (case 4); polycystic kidney (case 6) | 6                  | 24<br>(case 1) 33<br>(case 2) 28<br>(case 3) 34<br>(case 4) 33<br>(case 5) 35<br>(case 6) | Before (4 cases); during (1 case)     | HD: 4 hours 6x/week (case 1), 3 and 5 hours 6x/week (case 2), 3 and 5 hours 5x/week (case 3), 3 hours 6x/week (cases 4,5,6) | All patients had preterm deliveries (gestational age of 33 ± 1.7 weeks) | Intra-dialysis IV essential amino acids the first quarter (100g) (case 2); vitamins (C, thiamin, riboflavin, niacin, B6 and folic acid), minerals (calcium, zinc, IV iron) (cases 1,2,3,4,5,6). |
| Choi et al. (2018)<br>Korea [87]     | Unclear, chronic glomerulonephritis was suspected                                                                                                        | 1                  | 37                                                                                        | Before                                | CAPD: 5x2 L exchanges/day, using 2.5%–1.5%–1.5%–1.5% physioneal (dextrose dialysis solution) and                            | 27 + 4                                                                  | Folic acid/day (4 g/day), ferrous iron 256 mg/day.                                                                                                                                              |

| Author(s)<br>Location                       | Aetiology of Kidney<br>Disease | No. of<br>Subjects                                              | Maternal<br>Age*                 | Dialysis<br>Commencement <sup>†</sup>             | Dialysis<br>Regimen                                                                                                                                                    | Pregnancy<br>Term <sup>‡</sup> | Supplementation                                                                                                                                                                                                                                                                                                                                                                                                                                                       |
|---------------------------------------------|--------------------------------|-----------------------------------------------------------------|----------------------------------|---------------------------------------------------|------------------------------------------------------------------------------------------------------------------------------------------------------------------------|--------------------------------|-----------------------------------------------------------------------------------------------------------------------------------------------------------------------------------------------------------------------------------------------------------------------------------------------------------------------------------------------------------------------------------------------------------------------------------------------------------------------|
|                                             |                                |                                                                 |                                  |                                                   | extraneal<br>(icodextrin dialysis<br>solution)                                                                                                                         |                                |                                                                                                                                                                                                                                                                                                                                                                                                                                                                       |
| Tuot et al. (2009)<br>United States<br>[88] | Diabetes (presumed)            | 1                                                               | 36                               | Before                                            | HD: 4 hours<br>6x/week                                                                                                                                                 | 36                             | Prenatal multivitamin<br>(1x/day), folic acid (1<br>mg/day), vitamin B6<br>(100 mg/day), calcium<br>carbonate (1,250 mg<br>with meals), IV iron<br>supplementation<br>according to the<br>dialysis unit anemia<br>management protocol<br>(total 1,200 mg in 9<br>months), oral<br>calcitriol (0.25 mg<br>3x/week), IDPN<br>initiated at 14 weeks<br>providing a total of 1.5<br>calories/mL<br>(indicated by 5.5 kg<br>LOW compared to pre-<br>pregnancy dry weight). |
| Ribeiro & Silva<br>(2020)<br>Portugal [90]  | Class IV lupus<br>nephritis    | 1                                                               | 26                               | Before                                            | HD: 4 hours<br>5x/week                                                                                                                                                 | 28                             | Not reported                                                                                                                                                                                                                                                                                                                                                                                                                                                          |
| Giofre' et al.<br>(2007)<br>Italy [93]      | IgA nephropathy                | 3 (same<br>patient, but<br>only last 2<br>pregnancies<br>on HD) | 30<br>(case 2)<br>32<br>(case 3) | During 2nd pregnancy,<br>but before 3rd pregnancy | HD: 12 hours/week<br>(2nd trimester), 24<br>hours/week (3rd<br>trimester) (case 2);<br>12 hours/week<br>(first 8 weeks), 18<br>hours (during last<br>week) (average 15 | 33<br>(cases 2,3)              | Oral calcium<br>carbonate (2 g/day, as a<br>phosphorus<br>chelating agent),<br>vitamin D3 (0.25<br>mcg/day) (case 2);<br>calcium carbonate (3-4<br>g/day), vitamin D3 (0.25<br>mcg/day) (case 3).                                                                                                                                                                                                                                                                     |

| Author(s)<br>Location                          | Aetiology of Kidney<br>Disease | No. of<br>Subjects  | Maternal<br>Age*        | Dialysis<br>Commencement <sup>†</sup> | Dialysis<br>Regimen                                                                   | Pregnancy<br>Term <sup>‡</sup>                  | Supplementation                                                                                                                                                                                                                                                                                                                                                                                         |
|------------------------------------------------|--------------------------------|---------------------|-------------------------|---------------------------------------|---------------------------------------------------------------------------------------|-------------------------------------------------|---------------------------------------------------------------------------------------------------------------------------------------------------------------------------------------------------------------------------------------------------------------------------------------------------------------------------------------------------------------------------------------------------------|
|                                                |                                |                     |                         |                                       | hours 40 min) (case<br>3)                                                             |                                                 |                                                                                                                                                                                                                                                                                                                                                                                                         |
| Malik et al.<br>(1997)<br>Saudi Arabia<br>[94] | Chronic<br>pyelonephritis      | 3 (same<br>patient) | 33 (first<br>pregnancy) | Before all pregnancies                | HD: 3x/week in<br>1st/2nd trimesters,<br>4x/week in 3rd<br>trimester (cases<br>1,2,3) | 36 (case 1)<br>27<br>(case 2)<br>23<br>(case 3) | Oral iron and vitamin<br>supplements (case 1).                                                                                                                                                                                                                                                                                                                                                          |
| Campos-Collado<br>et al. (2016)<br>Mexico [95] | Unknown                        | 1                   | 22                      | Before                                | HD: 14 hours/week                                                                     | 34 + 2                                          | Folic acid/day (5<br>mg/day), calcium (300<br>mg/day in 1st<br>trimester, then 550<br>mg/day in 2nd/3rd<br>trimesters), vitamin D3<br>(200 IU/day), iron<br>(elemental iron was 160<br>mg/day in 1st/2nd<br>trimesters, then 460<br>mg/day in 3rd<br>trimester),<br>multivitamin (1,500 IU<br>vitamin A, 200 mg<br>vitamin C, 250 IU<br>vitamin D3, 1 mg folic<br>acid, 250 mg calcium, 60<br>mg iron). |
| Reister et al.<br>(1999)<br>Germany [98]       | Not reported                   | 1                   | 32                      | Before                                | HD: 4 hours until<br>20 weeks gestation,<br>then 4.5 or 5 hours                       | 28 + 6                                          | Iron substitution                                                                                                                                                                                                                                                                                                                                                                                       |

| Author(s)<br>Location                             | Aetiology of Kidney<br>Disease                                                                                                          | No. of<br>Subjects | Maternal<br>Age*                 | Dialysis<br>Commencement †          | Dialysis<br>Regimen                                                                                                                                                                                                                                             | Pregnancy<br>Term ‡               | Supplementation                                                                                                                                                                                                                            |
|---------------------------------------------------|-----------------------------------------------------------------------------------------------------------------------------------------|--------------------|----------------------------------|-------------------------------------|-----------------------------------------------------------------------------------------------------------------------------------------------------------------------------------------------------------------------------------------------------------------|-----------------------------------|--------------------------------------------------------------------------------------------------------------------------------------------------------------------------------------------------------------------------------------------|
|                                                   |                                                                                                                                         |                    |                                  |                                     | thereafter; 3x/week<br>until 12 weeks<br>gestation, then<br>5x/week thereafter                                                                                                                                                                                  |                                   |                                                                                                                                                                                                                                            |
| Swaroop et al.<br>(2009)<br>United States<br>[99] | Hypertensive<br>nephrosclerosis<br>secondary to poorly<br>controlled<br>hypertension (case 1);<br>polycystic kidney<br>disease (case 2) | 2                  | 33<br>(case 1)<br>28<br>(case 2) | Before (case 1); during<br>(case 2) | HD: 3.5 hours<br>6x/week (case 1); 3<br>hours 15 minutes<br>6x/week (case 2)                                                                                                                                                                                    | 27 + 3 (case 1)<br>29<br>(case 2) | Multivitamin, folic acid,<br>iron (cases 1,2).                                                                                                                                                                                             |
| Yoo et al. (2004)<br>United States<br>[100]       | Chronic glomerulo-<br>nephritis                                                                                                         | 1<br>(triplets)    | 36                               | Before                              | HD:<br>4 hours 3 x/week,<br>4.25 hours 3x/week<br>from 12 weeks<br>gestation, 4.5 hours<br>3x/week from 16<br>weeks gestation, 3<br>hours 6x/week<br>from 26 weeks<br>gestation, 3 and<br>3.25 hours on<br>alternate<br>days 6x/week from<br>30 weeks gestation | 34                                | Prenatal vitamins,<br>folic acid, iron<br>(including 5 doses of<br>50 mg IV iron dextran<br>during the 28th and<br>32nd week of<br>gestation), IV<br>calcitriol (stopped at 26<br>weeks when serum<br>PTH level decreased to<br>28 pg/mL). |
| Giatras et al.<br>(1998)<br>United States [15]    | Focal segmental<br>glomerulosclerosis &<br>chronic interstitial<br>nephritis                                                            | 1                  | 32                               | Before                              | HD: 4 hours<br>4x/week until 28<br>weeks gestation,<br>then 3.5 hours<br>4x/week until                                                                                                                                                                          | 33                                | Vitamin D (0.5 µg x<br>3/week), folic acid (1 mg<br>q.d.), prenatal<br>vitamins.                                                                                                                                                           |



| Author(s)<br>Location                        | Aetiology of Kidney<br>Disease                                                                                                                                                                                                                                               | No. of<br>Subjects | Maternal<br>Age*                                                                                                                                                          | Dialysis<br>Commencement <sup>†</sup>        | Dialysis<br>Regimen                                                                                                                                                                                                                                                                                                                                                                    | Pregnancy<br>Term <sup>‡</sup>                                                                                                                                       | Supplementation                                                                           |
|----------------------------------------------|------------------------------------------------------------------------------------------------------------------------------------------------------------------------------------------------------------------------------------------------------------------------------|--------------------|---------------------------------------------------------------------------------------------------------------------------------------------------------------------------|----------------------------------------------|----------------------------------------------------------------------------------------------------------------------------------------------------------------------------------------------------------------------------------------------------------------------------------------------------------------------------------------------------------------------------------------|----------------------------------------------------------------------------------------------------------------------------------------------------------------------|-------------------------------------------------------------------------------------------|
|                                              |                                                                                                                                                                                                                                                                              |                    |                                                                                                                                                                           |                                              | delivery                                                                                                                                                                                                                                                                                                                                                                               |                                                                                                                                                                      |                                                                                           |
| Luciani et al.<br>(2002)<br>Italy [101]      | Autosomal<br>dominant polycystic<br>kidney disease (case<br>1); graft-failure<br>chronic rejection (case<br>2); reflux nephropathy<br>(case 3);<br>membrano-<br>proliferative<br>glomerulonephritis<br>(case 4); autosomal<br>dominant polycystic<br>kidney disease (case 5) | 5                  | 22<br>(case 1)<br>29<br>(case 2) 28<br>(case 3); 25<br>(case 4) 30<br>(case 5)                                                                                            | Before (cases 1,2,3,4);<br>during (case 5)   | HD: 18-24 hours<br>6x/week (case 1);<br>16-20 hours 4-<br>5x/week (case 2);<br>24-27 hours 4-<br>4.5/week (case 3);<br>10.5-14 hours 3-<br>4x/week (case 4); 21<br>hours 6x/week<br>(case 5)                                                                                                                                                                                           | 26 (case 1)<br>32 (case 2)<br>29 (case 3) 23<br>(case 4) 33<br>(case 5)                                                                                              | Iron and folic acid<br>(cases 1,2,3,4,5).                                                 |
| Hadj Sadek et al.<br>(2011)<br>Morocco [102] | Unknown (cases<br>2,3,4,5,8);<br>membrano-<br>proliferative<br>glomerulonephritis<br>(case 1); acute<br>tubular necrosis<br>complicating<br>postpartum<br>hemorrhage (case 6);<br><br>diabetic<br>nephropathy (case 7)                                                       | 8                  | 24<br>(case 1) 25<br>(case 2)<br>31<br>(case 3a)<br>34<br>(case 3b)<br>39<br>(case 3c)<br>32<br>(case 4a)<br>35<br>(case 4b)<br>37<br>(cases 5,6)<br>45<br>(case 7)<br>38 | Before (cases<br>1,2,3a,3b,3c,4a,4b,5,6,7,8) | HD: 3x4 hour<br>sessions (case 1);<br>2x5 hour sessions<br>(case 2); 2x6 hour<br>sessions, then 3x4<br>hour sessions (from<br>12 weeks) (case 3a);<br>2x6 hour sessions,<br>then 3x5 hour<br>sessions (from 18<br>weeks) (case 3b);<br>3x4 hour sessions,<br>then 3x5 hour<br>sessions (from 20<br>weeks) (case 3c);<br>2x5 hour sessions<br>(case 4a); 2x5 hour<br>sessions, then 3x4 | 7<br>(cases 1,2)<br>36<br>(case 3a)<br>27<br>(case 3b)<br>30<br>(case 3c)<br>8<br>(case 4a)<br>37<br>(case 4b)<br>16<br>(case 5)<br>32<br>(case 6)<br>15<br>(case 7) | Unknown whether<br>supplements were<br>administered,<br>however oral iron<br>recommended. |

| Author(s)<br>Location                               | Aetiology of Kidney<br>Disease                                          | No. of<br>Subjects | Maternal<br>Age*                 | Dialysis<br>Commencement †          | Dialysis<br>Regimen                                                                                                                                                                                                                                                                                                     | Pregnancy<br>Term ‡        | Supplementation                                                                                                                                             |
|-----------------------------------------------------|-------------------------------------------------------------------------|--------------------|----------------------------------|-------------------------------------|-------------------------------------------------------------------------------------------------------------------------------------------------------------------------------------------------------------------------------------------------------------------------------------------------------------------------|----------------------------|-------------------------------------------------------------------------------------------------------------------------------------------------------------|
|                                                     |                                                                         |                    | (case 8)                         |                                     | hour sessions (from 22 weeks), then 4x4 hour sessions (from 26 weeks) (case 4b); 2x5 hour sessions (case 5); 3x4 hour sessions, then 4x4 hour sessions (from 20 weeks) (case 6); 3x4 hour sessions (case 7); 2x5 hour sessions, then 3x4 hour sessions (from 22 weeks), then 4x4 hour sessions (from 29 weeks) (case 8) | 33<br>(case 8)             |                                                                                                                                                             |
| Pepperell et al.<br>(1970)<br>Australia [103]       | Not reported                                                            | 1                  | 20                               | During                              | HD: 6 hours<br>3x/week                                                                                                                                                                                                                                                                                                  | 30                         | Oral iron and folic acid.                                                                                                                                   |
| Abu-Zaid et al.<br>(2013)<br>Saudi Arabia<br>[104]  | Post-bilateral<br>nephrectomy<br>secondary to chronic<br>pyelonephritis | 1                  | 31                               | Before                              | PD: 22 hours/week,<br>then 28 hours/week<br>(4 hours/day)                                                                                                                                                                                                                                                               | 29                         | Oral ferrous sulfate (200 mg 1x/day),<br>water-soluble<br>vitamins, vitamin D<br>supplementation not<br>required (serum<br>levels within normal<br>ranges). |
| Al-Saran &<br>Sabry (2008)<br>Saudi Arabia<br>[105] | Not reported (case 1);<br>chronic<br>glomerulonephritis<br>(case 2)     | 2                  | 37<br>(case 1)<br>36<br>(case 2) | Before (case 1); during<br>(case 2) | HD: 7 hours<br>3x/week (case 1); 6<br>hours 7x/week                                                                                                                                                                                                                                                                     | 30 (case 1) 32<br>(case 2) | Oral ferrous fumarate<br>(100 mg/day), IV iron<br>saccharate (100<br>mg/weekly), calcium<br>carbonate as a                                                  |

| Author(s)<br>Location                               | Aetiology of Kidney<br>Disease                                                          | No. of<br>Subjects | Maternal<br>Age*                 | Dialysis<br>Commencement <sup>†</sup> | Dialysis<br>Regimen                                                                                                                                                                                                                                                     | Pregnancy<br>Term <sup>‡</sup> | Supplementation                                                                                                                                                                                                                    |
|-----------------------------------------------------|-----------------------------------------------------------------------------------------|--------------------|----------------------------------|---------------------------------------|-------------------------------------------------------------------------------------------------------------------------------------------------------------------------------------------------------------------------------------------------------------------------|--------------------------------|------------------------------------------------------------------------------------------------------------------------------------------------------------------------------------------------------------------------------------|
|                                                     |                                                                                         |                    |                                  |                                       | from 20 weeks<br>gestation<br>(case 2)                                                                                                                                                                                                                                  |                                | phosphate binder (1,500 mg/day), multivitamins, folic acid (case 1); oral folic acid (5 mg/day), calcium carbonate (600 mg TID), iron saccharate (100 mg IV 1x/week) (case 2).                                                     |
| Ackrill et al.<br>(1975)<br>United<br>Kingdom [106] | Bilateral renal<br>scarring with<br>vesicoureteral reflux<br>& recurrent<br>bacteriuria | 1                  | 24                               | Before                                | Mode of dialysis<br>not reported: 30<br>hours/ week from<br>14 weeks gestation,<br>37 hours/ week<br>(across 5 sessions)<br>from 19 weeks<br>gestation                                                                                                                  | 32                             | Dialyzable vitamins<br>(Albee with vitamin C<br>tablets 2/day), folic acid,<br>iron (Slow-Fe Folic<br>tablets 2/day), no<br>calcium or vitamin D<br>supplements.                                                                   |
| Gómez Vázquez<br>et al. (2007)<br>Mexico [107]      | Bilateral<br>nephrolithiasis<br>(case 1); unknown<br>(case 2)                           | 2                  | 28<br>(case 1)<br>20<br>(case 2) | During (cases 1,2)                    | PD: 6<br>exchanges/day<br>(5x1,500 mL 1.5%<br>PD solution with a<br>dwell time of 3<br>hours, 1x1,500 mL<br>exchange of 4.25%<br>PD solution with a<br>dwell time of 4<br>hours) (case 1);<br>6 exchanges/day of<br>750 mL 1.5% PD<br>solution, with the<br>PD solution | 36 (case 1)<br>38 (case 2)     | Parenteral iron 1x/week,<br>vitamin<br>supplements, calcium,<br>oral iron, calcitriol (case<br>1); vitamin<br>supplementation, IV<br>iron dextran, calcium<br>carbonate 1 g with each<br>meal, calcitriol 0.25<br>µg/day (case 2). |

| Author(s)<br>Location                               | Aetiology of Kidney<br>Disease       | No. of<br>Subjects | Maternal<br>Age* | Dialysis<br>Commencement <sup>†</sup> | Dialysis<br>Regimen                                                                                                                     | Pregnancy<br>Term <sup>‡</sup> | Supplementation                                                                                                                |
|-----------------------------------------------------|--------------------------------------|--------------------|------------------|---------------------------------------|-----------------------------------------------------------------------------------------------------------------------------------------|--------------------------------|--------------------------------------------------------------------------------------------------------------------------------|
|                                                     |                                      |                    |                  |                                       | infusion volume increased by 250 mL each week until 1.5 L was reached (5 exchanges with bags of 1.5% and 1 with 1 bag of 2.5%) (case 2) |                                |                                                                                                                                |
| Mohammed et al. (2021)<br>Trinidad and Tobago [108] | Primary glomerulo-nephritis          | 1                  | 33               | Before                                | HD: 3.5-4 hours 6x/week                                                                                                                 | 34 + 4                         | Folic acid (5 mg/day), IV Venofer (100 mg every 2 weeks), caltrate/vitamin D3 (600 mg/400 IU, 2 tablets/day), IFA (2 tsp/day). |
| Alhwiesh (2015)<br>Saudi Arabia [109]               | Focal segmental glomerular sclerosis | 1                  | 38               | Before                                | PD: 10 L of Physioneal, each fill volume of 1.5 L over 9 hours                                                                          | 37                             | Calcium carbonate (1.2g 3x/day), calcitriol (0.5 mg/day), folic acid (5 mg/day), ferrous sulfate (190 mg/day), multivitamins.  |
| Pipili et al. (2011) Greece [110]                   | Glomerulonephritis                   | 1                  | 35               | Before                                | HD: 5x/week (for a total of 20 hours/week), then 6x/week after a month                                                                  | 33                             | IV iron sucrose (100 mg/week), folic acid (10 mg/day).                                                                         |
| Ramadani et al. (2018)<br>Indonesia [111]           | Not reported                         | 1                  | 30               | Before                                | HD: 4 hours 3x/week                                                                                                                     | 31-32                          | Iron, calcium, vitamins, folic acid.                                                                                           |

| Author(s)<br>Location                                    | Aetiology of Kidney<br>Disease                                                                                                                                                                         | No. of<br>Subjects | Maternal<br>Age*                                                                                                                                | Dialysis<br>Commencement <sup>†</sup> | Dialysis<br>Regimen                                                                                                               | Pregnancy<br>Term <sup>‡</sup>                                                                                   | Supplementation                                                                                                                                                                                                                                                                 |
|----------------------------------------------------------|--------------------------------------------------------------------------------------------------------------------------------------------------------------------------------------------------------|--------------------|-------------------------------------------------------------------------------------------------------------------------------------------------|---------------------------------------|-----------------------------------------------------------------------------------------------------------------------------------|------------------------------------------------------------------------------------------------------------------|---------------------------------------------------------------------------------------------------------------------------------------------------------------------------------------------------------------------------------------------------------------------------------|
| Hussain et al.<br>(2005)<br>United States<br>[112]       | Not reported<br>(case 1);<br>hypertension (case 2)                                                                                                                                                     | 2                  | 21<br>(case 1) 33<br>(case 2)                                                                                                                   | During (case 1); before<br>(case 2)   | HD: 3 hours<br>6x/week (case 1); 20<br>hours/week (6<br>sessions/week)<br>(case 2)                                                | 31 + 5<br>(case 1)<br>25 + 6<br>(case 2)                                                                         | Oral supplementation<br>of calcium acetate, 1,25-<br>dihydroxy-<br>vitamin D3, multi-<br>vitamins, folic acid,<br>parenteral iron (case 1);<br>oral<br>supplementation of<br>calcium, multi-<br>vitamins, folic acid,<br>parenteral iron,<br>parenteral calcitriol<br>(case 2). |
| Kedzierska et al.<br>(2011)<br>Poland &<br>Germany [113] | Fanconi-Bickel<br>syndrome (FBS)                                                                                                                                                                       | 1                  | 31                                                                                                                                              | During                                | HD: 4 hours<br>6x/week until ~25<br>weeks gestation,<br>then 5 hours<br>6x/week thereafter                                        | 34                                                                                                               | Potassium prescribed;<br>authors also<br>recommend electrolyte<br>replacement and<br>vitamin D.                                                                                                                                                                                 |
| Bahadi et al.<br>(2010)<br>Morocco [61]                  | Chronic<br>glomerulopathy (case<br>1);<br>indeterminate<br>nephropathy (cases<br>2,5,6,7);<br>tubulointerstitial<br>nephritis (case 3);<br>nephrolithiasis (cases<br>4,8); IgA nephropathy<br>(case 9) | 9                  | 34<br>(case 1) 37<br>(case 2)<br>35<br>(case 3)<br>35<br>(case 4)<br>22<br>(case 5)<br>40<br>(case 6)<br>40<br>(case 7)<br>37<br>(case 8)<br>32 | Before (cases<br>1,2,3,4,5,6,7,8,9)   | HD: 18 hours/week<br>(cases 1,2,4); 12<br>hours/week (cases<br>3,5); 24 hours/week<br>(cases 6,8,9); 16<br>hours/week<br>(case 7) | 27 (case 1)<br>33 (case 2) 7<br>(case 3)<br>36<br>(cases 4,6)<br>21 (case 5)<br>35<br>(cases 7,8)<br>34 (case 9) | Iron (4 cases).                                                                                                                                                                                                                                                                 |

| Author(s)<br>Location                                | Aetiology of Kidney<br>Disease             | No. of<br>Subjects | Maternal<br>Age* | Dialysis<br>Commencement † | Dialysis<br>Regimen                                          | Pregnancy<br>Term ‡ | Supplementation                                                                                                                                                                                                                                                                                  |
|------------------------------------------------------|--------------------------------------------|--------------------|------------------|----------------------------|--------------------------------------------------------------|---------------------|--------------------------------------------------------------------------------------------------------------------------------------------------------------------------------------------------------------------------------------------------------------------------------------------------|
|                                                      |                                            |                    | (case 9)         |                            |                                                              |                     |                                                                                                                                                                                                                                                                                                  |
| López-Menchero<br>et al.<br>(2004)<br>Spain<br>[115] | Lupus nephropathy                          | 1                  | 29               | Before                     | HD: 3-3.5 hours<br>6x/week                                   | 33 + 1              | Folic acid, vitamin B1,<br>vitamin B6, vitamin<br>B12.                                                                                                                                                                                                                                           |
| Coyle et al.<br>(2008)<br>United States<br>[116]     | Chronic interstitial<br>nephritis          | 1                  | 33               | During                     | HD: 3 hours<br>5x/week                                       | 39                  | Oral ferrous sulfate (325<br>mg 2-3x/day, as<br>tolerated) (1st<br>trimester), zinc (daily),<br>IV iron<br>sucrose injection (100<br>mg for 2 doses was<br>started then 50<br>mg/week from 2nd<br>trimester),<br>liquid protein<br>supplements, no<br>phosphate binders were<br>prescribed.      |
| Sheriff et al.<br>(1978)<br>United<br>Kingdom [118]  | Chronic glomerulo-<br>nephritis (presumed) | 1                  | 44               | Before                     | HD: 3 days/week<br>(during final 4<br>weeks of<br>pregnancy) | 36                  | Vitamin C, aneurine Co<br>forte, folic acid (all<br>doubled during final 4<br>weeks of<br>pregnancy), serum<br>phosphorus were well<br>controlled by<br>aluminium hydroxide<br>given orally, oral<br>supplements of<br>calcium and<br>magnesium were<br>necessary for 2 weeks<br>after delivery. |

| Author(s)<br>Location                                      | Aetiology of Kidney<br>Disease                                          | No. of<br>Subjects | Maternal<br>Age*                 | Dialysis<br>Commencement <sup>†</sup> | Dialysis<br>Regimen                                                                                                                                                                                                                  | Pregnancy<br>Term <sup>‡</sup> | Supplementation                                                                                                               |
|------------------------------------------------------------|-------------------------------------------------------------------------|--------------------|----------------------------------|---------------------------------------|--------------------------------------------------------------------------------------------------------------------------------------------------------------------------------------------------------------------------------------|--------------------------------|-------------------------------------------------------------------------------------------------------------------------------|
| Walsh (2002)<br>United<br>Kingdom [119]                    | Reflux nephropathy                                                      | 1                  | 31                               | Before                                | HD: 3 days/week<br>(1st trimester), 5<br>hours 6x/week<br>(from 2nd<br>trimester)                                                                                                                                                    | 29                             | Iron                                                                                                                          |
| Cocîrță et al.<br>(2016)<br>Romania [121]                  | Not reported (case 1);<br>hepatorenal<br>polycystic disease<br>(case 2) | 2                  | 36<br>(case 1)<br>42<br>(case 2) | Before (cases 1,2)                    | HD: 3x/week<br>(cases 1,2)                                                                                                                                                                                                           | 33 (case 1) 36<br>(case 2)     | Not reported                                                                                                                  |
| Guida et al.<br>(2003)<br>Italy [123]                      | Renal hypoplasia                                                        | 1                  | 22                               | Before                                | HD: 4 x/week                                                                                                                                                                                                                         | 36                             | 20g of daily protein was<br>administered as<br>supplement of protein<br>at low phosphorus<br>content.                         |
| McPhatter &<br>Drumheller (2008)<br>United States<br>[125] | IgA nephropathy                                                         | 1                  | 29                               | During                                | HD: 3 hours<br>5x/week, then 4<br>hours 5x/week                                                                                                                                                                                      | 37                             | IV iron sucrose (50<br>mg/week), prenatal<br>vitamins (not changed<br>to renal vitamins to<br>minimise medication<br>change). |
| Sandhu et al.<br>(2014)<br>United States<br>[127]          | Autosomal<br>dominant polycystic<br>kidney disease                      | 1                  | 25                               | During                                | CAPD: 1.5%<br>dextrose dialysate<br>(whole pregnancy)<br>Exchanges/day: 4<br>(beginning), 5 (24<br>weeks gestation),<br>12 (pre-delivery)<br>Fill volumes (L): 2<br>(beginning), 1.5 (24<br>weeks gestation),<br>0.25 (pre-delivery) | 38 + 5                         | Iron (for anaemia),<br>calcitriol (for<br>Hyper-<br>parathyroidism).                                                          |

| Author(s)<br>Location                       | Aetiology of Kidney<br>Disease | No. of<br>Subjects | Maternal<br>Age* | Dialysis<br>Commencement † | Dialysis<br>Regimen                                                                                                                                                                | Pregnancy<br>Term ‡      | Supplementation                                                                                                                                                                                                                                                                                                                                                                                                                                                          |
|---------------------------------------------|--------------------------------|--------------------|------------------|----------------------------|------------------------------------------------------------------------------------------------------------------------------------------------------------------------------------|--------------------------|--------------------------------------------------------------------------------------------------------------------------------------------------------------------------------------------------------------------------------------------------------------------------------------------------------------------------------------------------------------------------------------------------------------------------------------------------------------------------|
|                                             |                                |                    |                  |                            | Total volumes (L):<br>8 (beginning), 7.5<br>(24 weeks<br>gestation), 0.25<br>(pre-delivery)<br>Dwell times<br>(hours): 3<br>(beginning/24<br>weeks gestation), 2<br>(pre-delivery) |                          |                                                                                                                                                                                                                                                                                                                                                                                                                                                                          |
| Brookhyser (1989)<br>United States<br>[128] | Not reported                   | 1                  | 30               | During                     | HD: Daily<br>(inpatient), then 4<br>hours 6x/day<br>(outpatient)                                                                                                                   | 23<br>(foetal<br>demise) | 2x Tabrons/day,<br>ferrous gluconate (300<br>mg/day), zinc sulfate<br>(220 mg/day), pre-<br>natal vitamin and<br>mineral supplements<br>contraindicated due to<br>high vitamin A content,<br>10 mg zinc added to<br>parenteral nutrition<br>regimen at 23 weeks,<br>phosphorous levels<br>occasionally required<br>adjustment by diet and<br>medication;<br>parenteral nutrition was<br>administered during<br>HD treatments at 20<br>weeks gestation<br>(regimen: 500cc |



| Author(s)<br>Location                                           | Aetiology of Kidney<br>Disease                                                                                                              | No. of<br>Subjects | Maternal<br>Age*                 | Dialysis<br>Commencement †          | Dialysis<br>Regimen                                                                                                     | Pregnancy<br>Term ‡                | Supplementation                                                                                                                                                                                   |
|-----------------------------------------------------------------|---------------------------------------------------------------------------------------------------------------------------------------------|--------------------|----------------------------------|-------------------------------------|-------------------------------------------------------------------------------------------------------------------------|------------------------------------|---------------------------------------------------------------------------------------------------------------------------------------------------------------------------------------------------|
|                                                                 |                                                                                                                                             |                    |                                  |                                     |                                                                                                                         |                                    | dextrose 35% and 500cc amino acids 3.5%, providing 680 kcal and 21g protein/treatment).                                                                                                           |
| Park et al. (2006)<br>Korea [129]                               | Not reported                                                                                                                                | 2                  | 28<br>(case 1)<br>37<br>(case 2) | During (case 1); before<br>(case 2) | CAPD (case 1); HD<br>4-5x/week (case 2)                                                                                 | 37 (case 1)<br>Unclear<br>(case 2) | Oral iron<br>supplementation<br>(cases 1, 2).                                                                                                                                                     |
| Yattara et al.<br>(2019)<br>Mali & Republic of<br>Senegal [130] | Extra-capillary<br>glomerulonephritis<br>associated with<br>thrombotic micro-<br>angiopathy secondary<br>to systemic<br>lupus erythematosus | 1                  | 32                               | Before                              | HD: 5 hours<br>3x/week (1st/2nd<br>trimesters), 1x5<br>hours + 1x4 hours +<br>2x3 hours<br>(4x/week) (3rd<br>trimester) | 37                                 | 1 tablet folic acid/day,<br>500 mg calcium 2x/day,<br>100 mg acetyl salicylic<br>acid/day<br>(1 sachet), iron.                                                                                    |
| Seed &<br>Gilbertson (2022)<br>Australia [132]                  | Vesicoureteral reflux                                                                                                                       | 1                  | 32                               | During                              | HD: 3 hours<br>3x/week (11 to 21<br>weeks gestation),<br>2.5 hours 2x/week<br>(21 to 31 weeks<br>gestation)             | 38                                 | Vitamin D3, oral iron,<br>magnesium, vitamin B6,<br>folic acid,<br>coenzyme Q10, iron<br>sucrose (100 mg<br>1x/week).                                                                             |
| Henderson (1996)<br>United States<br>[133]                      | Diabetic<br>nephropathy & renal<br>hypertension                                                                                             | 1                  | 24                               | Before                              | HD: 3 hours<br>3x/week, 3 hours<br>every other day<br>(from 20.5 weeks),<br>then daily dialysis<br>(from 21 weeks)      | 28+5                               | Nephrovite Rx+ Fe<br>2x/day (provides 120<br>mg vitamin C, 3 mg<br>thiamin, 3.4 mg<br>riboflavin, 40 mg<br>niacin, 24.4 mg<br>pantothenic acid, 20 mg<br>vitamin B6, 12 ug<br>vitamin B12, 600 ug |

| Author(s)<br>Location                               | Aetiology of Kidney<br>Disease                           | No. of<br>Subjects | Maternal<br>Age*                                                  | Dialysis<br>Commencement †          | Dialysis<br>Regimen                                                                             | Pregnancy<br>Term ‡                                                | Supplementation                                                                                                                                                                                                                                                                         |
|-----------------------------------------------------|----------------------------------------------------------|--------------------|-------------------------------------------------------------------|-------------------------------------|-------------------------------------------------------------------------------------------------|--------------------------------------------------------------------|-----------------------------------------------------------------------------------------------------------------------------------------------------------------------------------------------------------------------------------------------------------------------------------------|
|                                                     |                                                          |                    |                                                                   |                                     |                                                                                                 |                                                                    | <p>biotin, 2 mg folate, 200 mg iron, 14 mg zinc), zinc sulfate 220 mg 2x/week, ferrous fumarate, no magnesium supplement (to avoid toxicity), no calcium supplement</p> <p>(on a 3.0 mEq/L dialysate bath providing 650- 750 mg of calcium per treatment), no vitamin D supplement.</p> |
| Melendez et al.<br>(1988)<br>United States<br>[135] | Nephrotic syndrome<br>(case 1); not reported<br>(case 2) | 2                  | 42<br>(case 1)<br>26<br>(case 2)                                  | Before (case 1); during<br>(case 2) | CAPD: Not<br>reported (case 1);<br>1,500 cc exchanges<br>throughout the<br>pregnancy (case 2)   | 34 (case 1)<br>36 (case 2)                                         | Not reported                                                                                                                                                                                                                                                                            |
| Vidal et al.<br>(1998)<br>Uruguay [137]             | Not reported                                             | 4                  | 21<br>(case 1) 32<br>(case 2)<br>30<br>(case 3)<br>24<br>(case 4) | Before (cases 1,2,3,4)              | HD: 18 hours/week<br>(cases 1,3); 18-21<br>hours/week (case<br>2); 18-24<br>hours/week (case 4) | 33.5<br>(case 1)<br>34.5<br>(case 2)<br>33 (case 3)<br>27 (case 4) | Caloric and protein<br>supplements (2nd<br>trimester), vitamins<br>C/D3 (0.25 ug/day)/B<br>complex, IV iron<br>(dextran and<br>gluconate), calcium<br>(calcium carbonate,                                                                                                               |

| Author(s)<br>Location                       | Aetiology of Kidney<br>Disease                                                                                                                                                                                                                   | No. of<br>Subjects | Maternal<br>Age*                                                                 | Dialysis<br>Commencement <sup>†</sup>       | Dialysis<br>Regimen                                                                                                                                                                                                                                                                                                                                                                                                                                                                         | Pregnancy<br>Term <sup>‡</sup>                                                                                              | Supplementation                                                                                                                                                                                                                                                                                             |
|---------------------------------------------|--------------------------------------------------------------------------------------------------------------------------------------------------------------------------------------------------------------------------------------------------|--------------------|----------------------------------------------------------------------------------|---------------------------------------------|---------------------------------------------------------------------------------------------------------------------------------------------------------------------------------------------------------------------------------------------------------------------------------------------------------------------------------------------------------------------------------------------------------------------------------------------------------------------------------------------|-----------------------------------------------------------------------------------------------------------------------------|-------------------------------------------------------------------------------------------------------------------------------------------------------------------------------------------------------------------------------------------------------------------------------------------------------------|
|                                             |                                                                                                                                                                                                                                                  |                    |                                                                                  |                                             |                                                                                                                                                                                                                                                                                                                                                                                                                                                                                             |                                                                                                                             | 1-2 g/day as intake and<br>1-1.5 g/day as binder)<br>(cases 1,2,3,4).                                                                                                                                                                                                                                       |
| Hou et al. (1993)<br>United States<br>[138] | Reflux, congenital<br>abnormalities,<br>recurrent UTIs (case<br>1); systemic lupus<br>erythematosus (case<br>2); reflux and<br>recurrent UTIs (case<br>3); polycystic kidney<br>disease (case 4);<br>systemic lupus<br>erythematosus<br>(case 5) | 5                  | 30<br>(case 1) 24<br>(case 2) 20<br>(case 3)<br>31<br>(case 4)<br>30<br>(case 5) | During (cases 1,3);<br>before (cases 2,4,5) | HD (cases 1,2,4,5):<br>3 hours 3x/week,<br>then more frequent<br>dialysis after 27<br>weeks gestation<br>(case 1);<br><br>3 hours 5x/week,<br>then 3 hours<br>6x/week ~3 months<br>after conception<br>(case 2); 3.5 hours<br>4x/week (case 4); 3<br>hours 3x/week,<br>then 3 hours<br>4x/week at 10<br>weeks gestation,<br>then 2.5 hours<br>6x/week at 23<br>weeks gestation<br>(case 5) CAPD<br>(case 3): 3<br>exchanges/day of<br>1,500 m, 1.5%<br>dextrose, this was<br>increased to 4 | 33 (case 1)<br>34 (case 2) 35<br>(case 3)<br>24 (baby did<br>not survive)<br>(case 4); 27<br>(foetal<br>demise)<br>(case 5) | Oral ferrous sulfate (325<br>mg 3x/day) (case1);<br>multivitamin with iron,<br>calcium carbonate (1g<br>with meals), IV 1,25<br>dihydroxy vitamin D3<br>(after each dialysis<br>session),<br>Imferon (1g) (case 2); IV<br>iron (2,300 mg),<br>folic acid (1 mg/day),<br>parenteral vitamin B12<br>(case 5). |

| Author(s)<br>Location                                 | Aetiology of Kidney<br>Disease    | No. of<br>Subjects  | Maternal<br>Age*                   | Dialysis<br>Commencement † | Dialysis<br>Regimen                                                                      | Pregnancy<br>Term ‡        | Supplementation                                                                                                                                                                                                                                                                                                                                                                                                                                                                               |
|-------------------------------------------------------|-----------------------------------|---------------------|------------------------------------|----------------------------|------------------------------------------------------------------------------------------|----------------------------|-----------------------------------------------------------------------------------------------------------------------------------------------------------------------------------------------------------------------------------------------------------------------------------------------------------------------------------------------------------------------------------------------------------------------------------------------------------------------------------------------|
|                                                       |                                   |                     |                                    |                            | exchanges/day at<br>32 weeks gestation                                                   |                            |                                                                                                                                                                                                                                                                                                                                                                                                                                                                                               |
| Brookhyser et al.<br>(1996)<br>United States<br>[139] | Chronic interstitial<br>nephritis | 2 (same<br>patient) | ~26<br>(case 1)<br>~27<br>(case 2) | Before                     | HD: 4 hours<br>5x/week (not<br>dialyzing on<br>Wednesdays and<br>Sundays) (cases<br>1,2) | 36 (case 1)<br>35 (case 2) | CarniVite (2<br>tablets/day), ferrous<br>sulfate (2x/day) (case 1);<br>Nephrovite (2<br>tablets/day), oral<br>Levocarnitine, 1x<br>Regain bar/day (15g<br>protein and 330 kcal),<br>Niferex (2 tablets<br>3x/day), IV iron (2nd<br>trimester) (case 2); Just<br>Right cereal (15 mg<br>zinc/serve as oral zinc<br>caused<br>gastrointestinal<br>upset), oral calcitriol (2x<br>0.25 ug tablets 4x/day),<br>Oscal (500mg, 5 tablets<br>6x/day), Cephulac (30<br>mL 4x/day PRN) (cases<br>1,2). |
| Amoah & Arab<br>(1991)<br>Saudi Arabia<br>[140]       | Not reported                      | 1                   | 35                                 | Before                     | HD: 4 hours<br>3x/week, then 3<br>hours 6x/week<br>(after 17 weeks<br>gestation)         | 30                         | Parenteral phosphate<br>replacement during<br>dialysis (to correct<br>hypophosphataemia);<br>calcium lactate (500 mg<br>calcium 3x/day),<br>calcitriol (0.5 ug/day),<br>ferrous sulphate (150<br>mg/day), vitamin B                                                                                                                                                                                                                                                                           |

| Author(s)<br>Location                              | Aetiology of Kidney<br>Disease                                     | No. of<br>Subjects | Maternal<br>Age* | Dialysis<br>Commencement <sup>†</sup> | Dialysis<br>Regimen                                                                                                        | Pregnancy<br>Term <sup>‡</sup> | Supplementation                                                                                                                                                                                                      |
|----------------------------------------------------|--------------------------------------------------------------------|--------------------|------------------|---------------------------------------|----------------------------------------------------------------------------------------------------------------------------|--------------------------------|----------------------------------------------------------------------------------------------------------------------------------------------------------------------------------------------------------------------|
|                                                    |                                                                    |                    |                  |                                       |                                                                                                                            |                                | complex (1 tablet post-dialysis), folic acid (5 mg post-dialysis).                                                                                                                                                   |
| Shah et al. (2007)<br>United<br>Kingdom [141]      | Goodpasture's<br>syndrome                                          | 1                  | 29               | Before                                | HD: 6x/week<br>(minimum 24<br>hours/week)                                                                                  | ~27 + 6                        | Iron, water-soluble<br>vitamins<br>(B/C), folic acid,<br>hypocalcaemia was<br>avoided by close<br>monitoring of calcium<br>and vitamin D levels<br>and ensuring adequate<br>doses of<br>calcium and<br>Alfacalcidol. |
| Dunbeck et al.<br>(1992)<br>United States<br>[142] | Focal segmental<br>glomerulosclerosis                              | 1                  | 23               | During                                | CAPD: Initially 500<br>cc; after 4 days the<br>patient started<br>4x1000cc<br>exchanges/day                                | 35                             | Feosol and Nephrocaps<br>daily.                                                                                                                                                                                      |
| Catran &<br>Benzie (1983)<br>Canada [143]          | Not reported                                                       | 1                  | 34               | Before                                | CAPD: 2L<br>exchanges 4x/day,<br>then 1L exchanges<br>6x/day (from 22<br>weeks gestation)                                  | 30 (stillborn)                 | A supplement of 20g of<br>protein once the patient<br>was known to be<br>pregnant, NutriFer Plus<br>1x/day.                                                                                                          |
| Villa et al. (2007)<br>Italy [144]                 | Membranous<br>glomerulonephritis<br>nephrotic syndrome<br>atypical | 1                  | 26               | Before                                | HD: 5 hours<br>4x/week (20<br>hours/week), then 5<br>hours 5x/week (25<br>hours/week) (from<br>26 weeks gestation<br>until | 31                             | Ferro gluconate<br>(1fl/week), calcitriol<br>(1 ug IV)/dialysis<br>(reduced at around 26<br>weeks gestation),<br>calcium carbonate<br>(2g/day), folic acid and                                                       |

| Author(s)<br>Location                              | Aetiology of Kidney<br>Disease | No. of<br>Subjects | Maternal<br>Age* | Dialysis<br>Commencement <sup>†</sup> | Dialysis<br>Regimen                                                                                                                                                                                                                                                                                               | Pregnancy<br>Term <sup>‡</sup> | Supplementation                                                                                                                                                                                                                                                           |
|----------------------------------------------------|--------------------------------|--------------------|------------------|---------------------------------------|-------------------------------------------------------------------------------------------------------------------------------------------------------------------------------------------------------------------------------------------------------------------------------------------------------------------|--------------------------------|---------------------------------------------------------------------------------------------------------------------------------------------------------------------------------------------------------------------------------------------------------------------------|
|                                                    |                                |                    |                  |                                       | delivery)                                                                                                                                                                                                                                                                                                         |                                | vitamin B12 at the end<br>of each<br>dialysis session.                                                                                                                                                                                                                    |
| Racette (1997)<br>British<br>Columbia [145]        | IgA<br>glomerulonephritis      | 1                  | 25               | Before                                | CAPD: Twin bag<br>system with 2L<br>exchanges 4x/day,<br>then patient placed<br>on a cyclor<br>machine allowing<br>1L of solution/hour<br>to be infused and<br>removal of 20L/day<br>(from 28 weeks<br>gestation) -<br>Maximum volume<br>of dialysis solution<br>exchange, with 4<br>hours/day off the<br>cyclor) | 30+3                           | Vitamins (Diavite),<br>calcium (Calsan), iron<br>(Fergon), IV iron every<br>2 weeks (iron dextran).                                                                                                                                                                       |
| Molaison et al.<br>(2003)<br>United States<br>[89] | Not reported                   | 1                  | 33               | Before                                | HD: Increased to<br>6x/week, however<br>the most<br>treatments the<br>patient received in<br>any 1 month was<br>22 (non-<br>compliant); the<br>patient had an<br>average of 13.3<br>hours of HD/week<br>with a range of                                                                                           | 31                             | Renal-formulated<br>vitamins with iron were<br>recommended (due to<br>risk of vitamin A<br>toxicity with<br>standard<br>supplement), folic acid<br>(1 mg/day), zinc (15<br>mg/day), discontinue<br>calcium<br>supplements, vitamin<br>D3 (calcitriol, 1<br>ug/treatment), |

| Author(s)<br>Location                   | Aetiology of Kidney<br>Disease | No. of<br>Subjects | Maternal<br>Age* | Dialysis<br>Commencement † | Dialysis<br>Regimen                                                   | Pregnancy<br>Term ‡    | Supplementation                                                                                                                                                                                                                                                                                                                                                                                                                                                                                  |
|-----------------------------------------|--------------------------------|--------------------|------------------|----------------------------|-----------------------------------------------------------------------|------------------------|--------------------------------------------------------------------------------------------------------------------------------------------------------------------------------------------------------------------------------------------------------------------------------------------------------------------------------------------------------------------------------------------------------------------------------------------------------------------------------------------------|
|                                         |                                |                    |                  |                            | 45-69.5<br>hours/month                                                |                        | phosphate binders with<br>meals (6 calcium acetate<br>tablets/meal), IV iron<br>until 2nd<br>trimester, oral iron<br>(renal formulated<br>vitamin with iron) from<br>2nd trimester until<br>delivery.                                                                                                                                                                                                                                                                                            |
| Stover (2004)<br>United States<br>[126] | Glomerulonephritis             | 1                  | ~30              | Before                     | HD: 3.5 hours<br>3x/week for ~2<br>months, then 3.75<br>hours 4x/week | Just under 35<br>weeks | Double dose renal<br>multivitamin, folic acid<br>(2 mg/day), zinc<br>gluconate (50 mg/day),<br>IV iron<br>sucrose (stopped<br>initially, then<br>resumed after a week<br>after the healthcare<br>team reviewed its safety<br>in the current<br>literature), calcium<br>acetate (2 tablets 3x/day<br>with meals and 1 tablet<br>with snacks (667 mg)<br>for 1 month) - The<br>patient asked to switch<br>to a phosphate binder<br>due to issues with<br>tolerance and was<br>prescribed 2 calcium |

| Author(s)<br>Location                               | Aetiology of Kidney<br>Disease | No. of<br>Subjects | Maternal<br>Age*              | Dialysis<br>Commencement <sup>†</sup> | Dialysis<br>Regimen                                                                                                                                                                        | Pregnancy<br>Term <sup>‡</sup> | Supplementation                                                                                                                                                                              |
|-----------------------------------------------------|--------------------------------|--------------------|-------------------------------|---------------------------------------|--------------------------------------------------------------------------------------------------------------------------------------------------------------------------------------------|--------------------------------|----------------------------------------------------------------------------------------------------------------------------------------------------------------------------------------------|
|                                                     |                                |                    |                               |                                       |                                                                                                                                                                                            |                                | carbonate tablets (550 mg) 3x/day with meals.                                                                                                                                                |
| Unzelman et al.<br>(1973)<br>United States<br>[147] | Glomerulonephritis             | 1                  | 26                            | Before                                | Nocturnal HD: 8 hours, 3-4x/week                                                                                                                                                           | 31                             | Oral iron, calcium gluconate, prenatal vitamins, folic acid.                                                                                                                                 |
| Perry (1994)<br>United States<br>[148]              | Not stated                     | 1                  | 21                            | Not stated                            | HD: 3 hours 3x/week, then 3 1/4 hours 3x/week at 25 weeks gestation, then 3 hours 4x/week at 28 weeks gestation                                                                            | 30                             | Polysaccharide iron complex (150 mg/day), Iberet with folate (vitamin B complex, vitamin C, and controlled-release iron, 1 tablet/day), folic acid (1 mg/day), zinc gluconate (22.5 mg/day). |
| Sivasuthan et al.<br>(2013)<br>Australia [149]      | Lupus nephritis (cases 1,2)    | 2                  | 30<br>(case 1) 20<br>(case 2) | Before (case 1); during (case 2)      | APD 3x 1.5% 6L bags until 20 weeks gestation, then CAPD 5 exchanges with 1.5% bags with volumes of 1.5L (case 1); HD: 3 hours 6x/week, then 4 hours 6x/week at 22 weeks gestation (case 2) | 31 (case 1) 29 (case 2)        | Not reported                                                                                                                                                                                 |



\*At diagnosis of pregnancy

† Before or during pregnancy

‡ Weeks + days

Abbreviations: CAPD, continuous ambulatory peritoneal dialysis; UF, ultrafiltration; HD, haemodialysis; IV, intravenous; LOW, loss of weight; PTH, parathyroid hormone; PD, peritoneal dialysis; TID, ter in die (three times a day); IFA, iron-folic acid; q.d., quaque die (once daily); PRN, pro re nata (as needed); APD, automated peritoneal dialysis; IDPN, intradialytic parenteral nutrition; UTI, urinary tract infection.

## References

1. National Health and Medical Research Council. *Nutrient Reference Values for Australia and New Zealand*; Australian Government Australian Government Department of Health and Aged Care & Manatu Hauora Ministry of Health: 2013.
2. Ikizler, T.A.; Burrowes, J.D.; Byham-Gray, L.D.; Campbell, K.L.; Carrero, J.-J.; Chan, W.; Fouque, D.; Friedman, A.N.; Ghaddar, S.; Goldstein-Fuchs, D.J.; et al. KDOQI Clinical Practice Guideline for Nutrition in CKD: 2020 Update. *American Journal of Kidney Diseases* **2020**, *76*, S1-S107, doi:<https://doi.org/10.1053/j.ajkd.2020.05.006>.
3. de Jong, M.F.C.; van Hamersvelt, H.W.; van Empel, I.W.H.; Nijkamp, E.J.W.; Lely, A.T. Summary of the Dutch Practice Guideline on Pregnancy Wish and Pregnancy in CKD. *Kidney International Reports* **2022**, *7*, 2575–2588, doi:10.1016/j.ekir.2022.09.029.
4. Schmidt, M.; Stracke, S.; Schneider, U.; Kuschel, B.; Feldkamp, T.; Habbig, S.; Mayer-Pickel, K.; Hartung, A.; Bader, B.; Weinmann-Menke, J.; et al. Chronic Kidney Disease and Pregnancy Guideline of the DGGG, OEGGG, DGfN (S2k Level, AWMF Registry No. 015-090). *Geburtshilfe und Frauenheilkunde* **2022**, *82*, 795–830, doi:10.1055/a-1765-4157.
5. Cabiddu, G.; Castellino, S.; Gernone, G.; Santoro, D.; Giacchino, F.; Credendino, O.; Daidone, G.; Gregorini, G.; Moroni, G.; Attini, R.; et al. Best practices on pregnancy on dialysis: the Italian Study Group on Kidney and Pregnancy. *Journal of Nephrology* **2015**, *28*, 279–288, doi:10.1007/s40620-015-0191-3.
6. Wiles, K.; Chappell, L.; Clark, K.; Elman, L.; Hall, M.; Lightstone, L.; Mohamed, G.; Mukherjee, D.; Nelson-Piercy, C.; Webster, P. Clinical practice guideline on pregnancy and renal disease. *BMC Nephrology* **2019**, *20*, 1–43.
7. Hladunewich, M.; Schatell, D. Intensive dialysis and pregnancy. *Hemodialysis international* **2016**, *20*, 339–348, doi:10.1111/hdi.12420.
8. Esposito, P.; Garibotto, G.; Picciotto, D.; Costigliolo, F.; Viazzi, F.; Conti, N.E. Nutritional Challenges in Pregnant Women with Renal Diseases: Relevance to Fetal Outcomes. *Nutrients* **2020**, *12*, doi:10.3390/nu12030873.
9. Reyes-López, M.A.; Piccoli, G.B.; Leone, F.; Orozco-Guillén, A.; Perichart-Perera, O. Nutrition care for chronic kidney disease during pregnancy: an updated review. *Eur J Clin Nutr* **2020**, *74*, 983–990, doi:10.1038/s41430-019-0550-6.
10. Wiggins, K.L. Nutrition care of adult pregnant ESRD patients. In *Nutrition Care of Renal Patients*, 3rd ed.; Burrowes, J. **2002**.
11. Hou, S. Pregnancy in chronic renal insufficiency and end-stage renal disease. *Am J Kidney Dis* **1999**, *33*, 235–252, doi:10.1016/s0272-6386(99)70296-9.
12. Jungers, P.; Chauveau, D. Pregnancy in renal disease. *Kidney international* **1997**, *52*, 871–885, doi:10.1038/ki.1997.408.
13. Hou, S.H. 14 Pregnancy in women on haemodialysis and peritoneal dialysis. *Bailliere's Clin. Obstet. Gynaecol.* **1994**, *8*, 481–500, doi:10.1016/S0950-3552(05)80332-3.
14. Holley, J.L.; Reddy, S.S. Pregnancy in Dialysis Patients: A Review of Outcomes, Complications, and Management. *Seminars in Dialysis* **2003**, *16*, 384–388, doi:10.1046/j.1525-139X.2003.16085.x.
15. Giatras, I.; Levy, D.P.; Malone, F.D.; Carlson, J.A.; Jungers, P. Pregnancy during dialysis: case report and management guidelines. *Nephrology Dialysis Transplantation* **1998**, *13*, 3266–3272, doi:10.1093/ndt/13.12.3266.
16. Shemin, D. Dialysis in pregnant women with chronic kidney disease. *Seminars in dialysis* **2003**, *16*, 379–383, doi:10.1046/j.1525-139x.2003.16084\_1.x.

17. Díaz, J.P.O.; Hernández, R.C.; Mayo, J.D.; Rodríguez, R.A.O.; Pérez, R.T. Diagnosis, evaluation, and management of renal diseases during Pregnancy. *Revista Habanera de Ciencias Medicas* **2016**, *15*, 834–858.
18. Alkhunaizi, A.; Melamed, N.; Hladunewich, M.A. Pregnancy in advanced chronic kidney disease and end-stage renal disease. *Current Opinion in Nephrology and Hypertension* **2015**, *24*, 252–259, doi:10.1097/mnh.000000000000119.
19. Nadeau-Fredette, A.C.; Hladunewich, M.; Hui, D.; Keunen, J.; Chan, C.T. End-stage renal disease and pregnancy. *Adv Chronic Kidney Dis* **2013**, *20*, 246–252, doi:10.1053/j.ackd.2013.01.010.
20. Medicine, I.o.; Meyers, L.D.; Hellwig, J.P.; Otten, J.J.; Staff, I.o.M. *Dietary Reference Intakes: The Essential Guide to Nutrient Requirements*; National Academies Press: Washington, D.C, 2006.
21. Reynolds, M.L.; Herrera, C.A. Chronic Kidney Disease and Pregnancy. *Advances in Chronic Kidney Disease* **2020**, *27*, 461–468, doi:<https://doi.org/10.1053/j.ackd.2020.04.003>.
22. Hou, S.; Firanek, C. Management of the pregnant dialysis patient. *Advances in Renal Replacement Therapy* **1998**, *5*, 24–30.
23. Brookhyser, J.; Wiggins, K. Medical nutrition therapy in pregnancy and kidney disease. *Adv. Renal Replacement Ther.* **1998**, *5*, 53–63.
24. Reddy, S.S.; Holley, J.L. Management of the Pregnant Chronic Dialysis Patient. *Advances in chronic kidney disease* **2007**, *14*, 146–155, doi:10.1053/j.ackd.2007.01.005.
25. Oliverio, A.L.; Hladunewich, M.A. End-Stage Kidney Disease and Dialysis in Pregnancy. *Advances in Chronic Kidney Disease* **2020**, *27*, 477–485, doi:10.1053/j.ackd.2020.06.001.
26. *Dietary Reference Intakes for Energy, Carbohydrate, Fiber, Fat, Fatty Acids, Cholesterol, Protein, and Amino Acids (Macronutrients)*. Food and Nutrition Board, Institute of Medicine: Washington, D.C., 2005.
27. NKF. Kidney Disease Outcomes Quality Initiative (KDOQI) clinical practice guidelines for nutrition in chronic renal failure. *American Journal of Kidney Diseases* **2000**.
28. Fouque, D.; Vennegoor, M.; Pedrini, L.; Pizzarelli, F.; Tattersall, J.; Tordoir, J.; Vanholder, R.; Ter Wee, P.; Wanner, C.; Basci, A.; et al. EBPG guideline on nutrition: European best practice guidelines on haemodialysis: endorsed by the European Renal Association-European Dialysis and Transplant Association (ERA-EDTA). *Nephrology, Dialysis, Transplantation* **2007**, *22*, doi: DOI: 10.1093/ndt/gfm020.
29. Tangren, J.; Nadel, M.; Hladunewich, M.A. Pregnancy and End-Stage Renal Disease. *Blood Purification* **2018**, *45*, 194–200, doi:10.1159/000485157.
30. Alp Ikizler, T.; Flakoll, P.J.; Parker, R.A.; Hakim, R.M. Amino acid and albumin losses during hemodialysis. *Kidney Int.* **1994**, *46*, 830–837, doi:10.1038/ki.1994.339.
31. Vecchio B, C.R., Del Negro, V., ; Savastano, V., Giovanna; Porpora, M.; Piccioni, G., Grazia, M.,. Dialysis on Pregnancy: An Overview. *Women* **2021**, *1*, 60–69, doi:10.3390/women1010005.
32. Cabiddu, G.; Castellino, S.; Gernone, G.; Santoro, D.; Moroni, G.; Giannattasio, M.; Gregorini, G.; Giacchino, F.; Attini, R.; Loi, V.; et al. A best practice position statement on pregnancy in chronic kidney disease: the Italian Study Group on Kidney and Pregnancy. *Journal of nephrology* **2016**, *29*, 277–303, doi:10.1007/s40620-016-0285-6.
33. Kapoor, N.; Makanjuola, D.; Shehata, H. Management of women with chronic renal disease in pregnancy. *The obstetrician & gynaecologist* **2009**, *11*, 185–191, doi:10.1576/toag.11.3.185.27503.
34. Castellano, G.; Losappio, V.; Gesualdo, L. Update on pregnancy in chronic kidney disease. *Kidney & blood pressure research* **2011**, *34*, 253–260, doi:10.1159/000327904.
35. Rizzoni, G.; Ehrich, J.H.H.; Broyer, M.; Brunner, F.P.; Brynger, H.; Fassbinder, W.; Geerlings, W.; Selwood, N.H.; Tufveson, G.; Wing, A.J. Successful pregnancies in women on renal replacement therapy: Report from the EDTA Registry. *Nephrology, dialysis, transplantation* **1992**, *7*, 279–287, doi:10.1093/oxfordjournals.ndt.a092129.
36. Hladunewich, M.; Hercz, A.E.; Keunen, J.; Chan, C.; Pierratos, A. Pregnancy in End Stage Renal Disease. *Seminars in Dialysis* **2011**, *24*, 634–639, doi:<https://doi.org/10.1111/j.1525-139X.2011.00996.x>.
37. Stover, J. Pregnancy and dialysis: an overview. *Nephrol Nurs J* **2010**, *37*, 652–654.
38. Hall, M.; Brunskill, N.J. Renal disease in pregnancy. *Obstetrics, Gynaecology and Reproductive Medicine* **2010**, *20*, 131–137, doi:10.1016/j.ogrm.2010.02.006.
39. Kothari, M.; Td, H.; Singh, M. Dialysis and Pregnancy-A Review. *International Journal of Nephrology and Kidney Failure* **2019**, doi: dx.doi. org/10.16966/2380-5498.175.

40. Hladunewich, M., Vella J, August P. Pregnancy in patients with nondialysis chronic kidney disease. In: Lam AQ, Eckler K (eds) **2019**.
41. Lim, C.T.S.; Wah, F.K. Pregnancy and peritoneal dialysis: an updated review. *European Medical Journal of Nephrology* **2018**, *6*.
42. Alvestrand, A. Nutritional requirements of dialysis patients. Manning S (ed.), *The Principles and Practice of Nephrology* (1995), St Louis: Mosby, 761-766.
43. Bergström, J., et al. Protein and energy intake, nitrogen balance and nitrogen losses in patients treated with continuous ambulatory peritoneal dialysis. *Kidney international*. 1993;44(5):1048-57.
44. Vázquez Rodríguez, J.G. Peritoneal dialysis and pregnancy. *Circulation* **2010**, *78*, 177.
45. Hou, S. Daily dialysis in pregnancy. *Hemodialysis International* **2004**, *8*, 167–171, doi:10.1111/j.1492-7535.2004.01091.x.
46. Onder, S.; Akbar, S.; Schmidt, R.J. Reproductive endocrinology in chronic kidney disease patients: new approaches to old challenges. In Proceedings of the Seminars in Dialysis, 2016; pp. 447–457.
47. Manisco, G.; Potì, M.; Maggiulli, G.; Di Tullio, M.; Losappio, V.; Vernaglione, L. Pregnancy in end-stage renal disease patients on dialysis: how to achieve a successful delivery. *Clin Kidney J* **2015**, *8*, 293–299, doi:10.1093/ckj/sfv016.
48. Holley, J.L.; Reddy, S.S. Endocrinology and Dialysis: Issue and Therapies  
Series Editor: Jean L. Holley: Pregnancy in Dialysis Patients: A Review of Outcomes, Complications, and Management: Pregnancy in Dialysis. *Seminars in dialysis* **2003**, *16*, 384–388, doi:10.1046/j.1525-139X.2003.16085.x.
49. Reddy, S.S.; Holley, J.L. The importance of increased dialysis and anemia management for infant survival in pregnant women on hemodialysis. *Kidney International* **2009**, *75*, 1133–1134, doi:10.1038/ki.2009.14.
50. Wiles, K.; de Oliveira, L. Dialysis in pregnancy. *Best Practice and Research: Clinical Obstetrics and Gynaecology* **2019**, *57*, 33–46, doi:10.1016/j.bpobgyn.2018.11.007.
51. Furaz-Czerpak, K.R.; Fernández-Juárez, G.; Moreno-de la Higuera, M.Á.; Corchete-Prats, E.; Puente-García, A.; Martín-Hernández, R. Pregnancy in women on chronic dialysis: a review. *Nefrología : publicacion oficial de la Sociedad Espanola Nefrologia* **2012**, *32*, 287–294, doi:10.3265/Nefrologia.pre2012.Jan.11319.
52. Singh, R.; Pradeep, Y. Pregnancy in women with chronic kidney disease. *Clinical queries, nephrology (India)* **2012**, *1*, 205–214, doi:10.1016/j.cqn.2012.06.006.
53. Stover, J. Nutritional Management of Pregnancy in Chronic Kidney Disease. *Advances in Chronic Kidney Disease* **2007**, *14*, 212–214, doi:<https://doi.org/10.1053/j.ackd.2007.01.011>.
54. National Research Council Subcommittee on the Tenth Edition of the Recommended Dietary, A. The National Academies Collection: Reports funded by National Institutes of Health. In *Recommended Dietary Allowances: 10th Edition*; Washington (DC), 1989.
55. Shehaj, L.; Kazancioğlu, R. Pregnancy in Chronic Kidney Disease. *Kidney and Dialysis* **2023**, *3*, 152–162.
56. Hladunewich, M., Vella J. Pregnancy in women with nondialysis chronic kidney disease. **2020**.
57. Vázquez-Rodríguez, J.G. Hemodialysis and pregnancy: technical aspects. *Cirugia y cirujanos* **2010**, *78*, 99.
58. Porter, A. A Review of the Pregnant ESRD Patient. *Kidney* **2009**, *18*, 238–240.
59. S. Hou; S. Elahi. Pregnancy In Peritoneal Dialysis Patients. *Indian Journal of Peritoneal Dialysis* **2005**, *8*, 14–16.
60. Nikolskaya, I.G.; Prokopenko, E.I. Pregnancy in end-stage chronic renal failure and hemodialysis treatment. *Russian Bulletin of Obstetrician-Gynecologist* **2014**, *14*, 29–36.
61. Bahadi, A.; El Kabbaj, D.; Guelzim, K.; Kouach, J.; Hassani, M.; Maoujoud, O.; Aattif, M.; Kadiri, M.; Montassir, D.; Zajjari, Y.; et al. Pregnancy during hemodialysis: a single center experience. *Saudi journal of kidney diseases and transplantation* **2010**, *21*, 646–651.
62. Hui, D.; Hladunewich, M.A. Chronic Kidney Disease and Pregnancy. *Obstetrics and Gynecology* **2019**, *133*, 1182–1194, doi:10.1097/AOG.0000000000003256.
63. Davison, J.M. Dialysis, Transplantation, and Pregnancy. *American Journal of Kidney Diseases* **1991**, *17*, 127–132, doi:10.1016/S0272-6386(12)81116-4.
64. Hou, S. Pregnancy in Women Requiring Dialysis for Renal Failure. *American Journal of Kidney Diseases* **1987**, *9*, 368–373, doi:10.1016/S0272-6386(87)80139-7.
65. Oliverio, A.L.; Bramham, K.; Hladunewich, M.A. Pregnancy and CKD: Advances in Care and the Legacy of Dr Susan Hou. *American Journal of Kidney Diseases* **2021**, *78*, 865–875, doi:10.1053/j.ajkd.2021.07.016.

66. Ramin, S.M.; Vidaeff, A.C.; Yeomans, E.R.; Gilstrap, L.C. Chronic Renal Disease in Pregnancy. *Obstetrics and gynecology (New York. 1953)* **2006**, *108*, 1531–1539, doi:10.1097/01.AOG.0000246790.84218.44.
67. Chan, W.; Okun, N.; Kjellstrand, C. Pregnancy in chronic dialysis: a review and analysis of the literature. *The International Journal of Artificial Organs* **1998**, *21*, 259–268.
68. Giannattasio, M.; Giannattasio, F.; Gernone, G. [Pharmacological and nutritional problems in pregnant patient on chronic dialysis]. *Giornale italiano di nefrologia : organo ufficiale della Societa italiana di nefrologia* **2017**, *34*.
69. Hou, S.H.; Grossman, S.D. Pregnancy in Chronic Dialysis Patients. *Seminars in Dialysis* **1990**, *3*, 224–229, doi:<https://doi.org/10.1111/j.1525-139X.1990.tb00053.x>.
70. Grossman, S.D.; Hou, S.; Moretti, M.; Saran, M. Nutrition in the Pregnant Dialysis Patient. *J. Renal Nutr.* **1993**, *3*, 56–66, doi:10.1016/S1051-2276(12)80243-3.
71. Bili, E.; Tsolakidis, D.; Stangou, S.; Tarlatzis, B. Pregnancy management and outcome in women with chronic kidney disease. *Hippokratia* **2013**, *17*, 163–168.
72. Lim, T.S.C.; Shanmuganathan, M.; Wong, I.; Goh, B.L. Successful multigravid pregnancy in a 42-year-old patient on continuous ambulatory peritoneal dialysis and a review of the literature. *BMC Nephrology* **2017**, *18*, 108, doi:10.1186/s12882-017-0540-7.
73. Sulaiman, K.; Vuppali, M.; Abreo, K. Patient outcome in pregnancy requiring dialysis: a case series. *The Open Urology & Nephrology Journal* **2014**, *7*.
74. Kondakova, E.V.; Filat'eva, A.E.; Lobanova, N.A.; Nagaev, E.I.; Sarimov, R.M.; Gudkov, S.V.; Vedunova, M.V. Case report: Applicability of breastfeeding the child of a patient with kidney failure with replacement therapy. *Front Med (Lausanne)* **2023**, *10*, 1098324, doi:10.3389/fmed.2023.1098324.
75. Cao, Y.; Zhang, Y.; Wang, X.; Zhang, Y.; Fan, Y.; Shi, H.; Dai, H. Successful pregnancy and delivery in uremic patients with maintenance hemodialysis: A case report. *Medicine (United States)* **2018**, *97*, doi:10.1097/MD.00000000000013614.
76. Arai, H.; Mori, K.P.; Yokoi, H.; Mizuta, K.; Ogura, J.; Suginami, K.; Endo, T.; Ikeda, Y.; Matsubara, T.; Tsukamoto, T.; et al. Intensified hemodialysis for complicated pregnancy in a primigravida with advanced maternal age: a case report with literature review focusing on appropriate hemodialysis management during pregnancy. *Renal Replacement Therapy* **2020**, *6*, 47, doi:10.1186/s41100-020-00296-7.
77. Sprenger-Mähr, H.; Zitt, E.; Kronbichler, A.; Cejna, M.; Lhotta, K. A hemodialysis patient with bone disease after pregnancy: a case report. *BMC nephrology* **2019**, *20*, 425, doi:10.1186/s12882-019-1603-8.
78. Mambap, A.T.; Bechem, E.; Kan, K.M.; Laah, S.N.; Sunjoh, F.; Ashuntantang, G.E. Case report: 11 years on hemodialysis with a 4-year-old baby girl: A success story. *Frontiers in Medicine* **2023**, *9*, doi:10.3389/fmed.2022.1091568.
79. Buil, B.A.; González, C.L.; Zamora, L.M.; Lamarca, M.S.; Villagrasa, E.V.; Gil, P.I. Successful pregnancy in patients on hemodialysis. Review and Recommendations. *Enfermeria Nefrológica* **2015**, *18*, 309–314.
80. Seker, A. Two successive pregnancies in a patient during 14 years of hemodialysis: a case report. *Journal of Medical Case Reports* **2016**, *10*, 50, doi:10.1186/s13256-016-0836-4.
81. Shanmugalingam, R.; Cole-Clark, A.; Lowrie, E.; Hennessy, A.; Makris, A. Clinical Use of Angiogenic Factors in Managing a Pregnant Woman on Hemodialysis to Term. *Kidney International Reports* **2021**, *6*, 1449–1453, doi:10.1016/j.ekir.2021.02.029.
82. Haase, M.; Morgera, S.; Bamberg, C.; Halle, H.; Martini, S.; Hoher, B.; Diekmann, F.; Dragun, D.; Peters, H.; Neumayer, H.-H.; et al. A systematic approach to managing pregnant dialysis patients—the importance of an intensified haemodiafiltration protocol. *Nephrology, dialysis, transplantation* **2005**, *20*, 2537–2542, doi:10.1093/ndt/gfi044.
83. Yu, P.; Diao, W.; Tang, Q.; Jiang, X. A successful pregnancy and parturition in a patient with anuria undergoing maintenance hemodialysis for 6 years: a case report of a 3-year-follow-up. *BMC pregnancy and childbirth* **2015**, *15*, 218, doi:10.1186/s12884-015-0642-9.
84. Successful Pregnancies in Women Treated by Dialysis and Kidney Transplantation. Report *BJOG : an international journal of obstetrics and gynaecology* **1980**, *87*, 839–845, doi:10.1111/j.1471-0528.1980.tb04434.x.
85. Hull, A.R. More dialysis appears beneficial for pregnant ESRD patients (at least in Belgium). *Am J Kidney Dis* **1998**, *31*, 863–864, doi:10.1016/s0272-6386(98)70059-9.
86. Espinoza, F.; Romeo, R.; Ursu, M.; Tapia, A.; Vukusich, A. Pregnancy during dialysis. Experience in six patients. *Revista Medica De Chile* **2013**, *141*, 1003–1009, doi:10.4067/S0034-98872013000800006.

87. Choi, C.Y.; Cho, N.J.; Park, S.; Gil, H.W.; Kim, Y.S.; Lee, E.Y. A case report of successful pregnancy and delivery after peritoneal dialysis in a patient misdiagnosed with primary infertility. *Medicine* **2018**, *97*, doi:10.1097/MD.00000000000011148.
88. Tuot, D.; Gibson, S.; Caughey, A.B.; Frassetto, L.A. Intradialytic hyperalimentation as adjuvant support in pregnant hemodialysis patients: case report and review of the literature. *International urology and nephrology* **2010**, *42*, 233–237.
89. Molaison, E.F.; Baker, K.; Bordelon, M.A.; Brodie, P.; Powell, K. Successful management of pregnancy in a patient receiving hemodialysis. *Journal of Renal Nutrition* **2003**, *13*, 229–232, doi:10.1016/S1051-2276(03)00073-6.
90. Ribeiro, C.I.; Silva, N. Pregnancy and dialysis. *J Bras Nefrol* **2020**, *42*, 349–356, doi:10.1590/2175-8239-jbn-2020-0028.
91. Nakabayashi, M.; Adachi, T.; Itoh, S.; Kobayashi, M.; Mishina, J.; Nishida, H. Perinatal and infant outcome of pregnant patients undergoing chronic hemodialysis. *Nephron* **1999**, *82*, 27–31, doi:10.1159/000045364.
92. Pires, A.; Branco, P.; Adragão, A.; Borges, A. Gravidez e Diálise. 2000.
93. Giofrè, F.; Pugliese, C.; Alati, G.; Messina, A.; Tramontana, D. Three successive pregnancies in a patient with chronic renal disease progressing from chronic renal dysfunction through to institution of dialysis during pregnancy and then on to maintenance dialysis. *Nephrology Dialysis Transplantation* **2007**, *22*, 1236–1240, doi:10.1093/ndt/gfl794.
94. Malik, G.H.; al-Wakeel, J.S.; Shaikh, J.F.; al-Mohaya, S.; Dohami, H.; Kechrid, M.; el Gamal, H. Three successive pregnancies in a patient on haemodialysis. *Nephrology Dialysis Transplantation* **1997**, *12*, 1991–1993, doi:10.1093/ndt/12.9.1991.
95. Campos-Collado, A.X.; Reyes-López, M.A.; Orozco-Guillén, A.; Muñoz-Manrique, C.; Perichart-Perera, O. Medical nutrition therapy for chronic kidney disease in pregnancy: a case report. *Journal of the Academy of Nutrition and Dietetics* **2016**, *116*, 213–218.
96. Wiggins, K.L. Guidelines for Nutrition Care of Renal Patients. . 3rd ed. *American Dietetic Association* **2001**.
97. Stover, J. Pregnancy and chronic kidney disease. In *A Clinical Guide to Nutrition Care in Kidney Disease*, 2nd ed.; Byham-Gray, L., Stover J, Wiesen K, Ed.; Academy of Nutrition and Dietetics: Chicago, IL, 2013.
98. Reister, F.; Reister, B.; Heyl, W.; Riehl, J.; Schroder, W.; Mann, H.; Rath, W. Dialysis and Pregnancy — A Case Report and Review of the Literature. *Renal Failure* **1999**, *21*, 533–539, doi:10.3109/08860229909045193.
99. Swaroop, R.; Zabaneh, R.; Parimoo, N. Pregnancy in end-stage renal disease patients on hemodialysis: two case reports. *Cases Journal* **2009**, *2*, 8139, doi:10.4076/1757-1626-2-8139.
100. Yoo, J.; Unnikrishnan, D.; Lwin, L.N.; Villanueva, H.J.; Tannenberg, A.M. Successful triplet pregnancy in a patient on chronic haemodialysis. *Nephrology Dialysis Transplantation* **2004**, *19*, 994–997, doi:10.1093/ndt/gfh028.
101. Luciani, G.; Bossola, M.; Tazza, L.; Panocchia, N.; Liberatori, M.; De Carolis, S.; Piccioni, E.; De Carolis, M.P.; Caruso, A.; Castagneto, M. Pregnancy during chronic hemodialysis: a single dialysis-unit experience with five cases. *Renal failure* **2002**, *24*, 853–862.
102. Hadj Sadek, B.; Keiji, S.; Rhou, H.; Ezzaitouni, F.; Ouzeddoun, N.; Bayahia, R.; Benamar, L. Pregnancy in chronic hemodialysis patients. *Journal de gynécologie, obstétrique et biologie de la reproduction* **2011**, *40*, 452–459, doi:10.1016/j.jgyn.2011.04.003.
103. Pepperell, R.J.; Adam, R.; Dawborn, J.K. Haemodialysis in the Management of Chronic Renal Failure During Pregnancy. *Australian & New Zealand journal of obstetrics & gynaecology* **1970**, *10*, 180–186, doi:10.1111/j.1479-828X.1970.tb00426.x.
104. Abu-Zaid, A.; Nazer, A.; AlOmar, O.; Al-Badawi, I.A. Successful pregnancy in a 31-year-old peritoneal dialysis patient with bilateral nephrectomy. *Case Reports in Obstetrics and Gynecology* **2013**, *2013*.
105. Al-Saran, K.A.; Sabry, A.A. Pregnancy in dialysis patients: a case series. *Journal of Medical Case Reports* **2008**, *2*, 10, doi:10.1186/1752-1947-2-10.
106. Ackrill, P.; Goodwin, F.; Marsh, F.; Stratton, D.; Wagman, H. Successful pregnancy in patient on regular dialysis. *Br Med J* **1975**, *2*, 172–174.

107. Gómez Vázquez, J.A.; Martínez Calva, I.E.; Fernández, R.M.; León, V.E.; Cardona, M.; Noyola, H. Pregnancy in end-stage renal disease patients and treatment with peritoneal dialysis: Report of two cases. *Peritoneal Dialysis International* **2007**, *27*, 353–358, doi:10.1177/089686080702700327.
108. Mohammed, E.; Ramrattan, A.; Sahadeo, A.; Brathwaite, E.; Soobrattee, S. A successful pregnancy of a dialysis patient in the Eastern Caribbean. *Open Access Text* **2021**, doi:DOI: 10.15761/NRD.1000181.
109. Alhwiesh, A. Pregnancy in peritoneal dialysis and an infant with a ventricular septal defect. *Saudi Journal of Kidney Diseases and Transplantation* **2015**, *26*, 111–114.
110. Pipili, C.; Grapsa, E.; Koutsobasili, A.; Sorvinou, P.; Poirazlar, E.; Kiosses, D.; Xatzigeorgiou, G. Pregnancy in dialysis-dependent women-the importance of frequent dialysis and collaborative care: A case report. *Hemodialysis International* **2011**, *15*, 306–311, doi:10.1111/j.1542-4758.2011.00552.x.
111. Ramadani, S.; Nasution, A.; Nasution, S.; Lubis, H. Pregnancy in chronic dialysis, late diagnosis, and other problems. In Proceedings of the IOP Conference Series: Earth and Environmental Science, 2018; p. 012113.
112. Hussain, S.A.; Savin, V.; Piering, W.; Tomasi, J.; Blumenthal, S. Phosphorus-enriched hemodialysis during pregnancy: Two case reports. *Hemodialysis International* **2005**, *9*, 147–152, doi:10.1111/j.1492-7535.2005.01133.x.
113. Kedzierska, K.; Kwiatkowski, S.; Torbé, A.; Marchelek-Mysliwiec, M.; Marcinkiewicz, O.; Bobrek-Lesiakowska, K.; Gołembiewska, E.; Kwiatkowska, E.; Rzepka, R.; Ciechanowski, K.; et al. Successful pregnancy in the patient with Fanconi-Bickel syndrome undergoing daily hemodialysis. *American Journal of Medical Genetics, Part A* **2011**, *155*, 2028–2030, doi:10.1002/ajmg.a.34099.
114. Avram, M.M.; Bonomini, L.V.; Sreedhara, R.; Mittman, N. Predictive value of nutritional markers (albumin, creatinine, cholesterol, and hematocrit) for patients on dialysis for up to 30 years. *Am J Kidney Dis* **1996**, *28*, 910–917, doi:10.1016/s0272-6386(96)90394-7.
115. López-Mencheró, R.; Alberó, M.D.; Cabeza, B.; Álvarez, L.; Del Pozo, C.; Sánchez, L. Successful pregnancy in a patient with systemic lupus erythematosus on hemodialysis. *Nefrología* **2004**, *24*, 70–74.
116. Coyle, M.; Sulger, E.; Fletcher, C.; Rouse, D. A successful 39-week pregnancy on hemodialysis: a case report. *Nephrology nursing journal : journal of the American Nephrology Nurses' Association* **2008**, *35*, 348.
117. Haase, M.; Morgera, S.; Bamberg, C.; Halle, H.; Martini, S.; Hoher, B.; Diekmann, F.; Dragun, D.; Peters, H.; Neumayer, H.-H. A systematic approach to managing pregnant dialysis patients—the importance of an intensified haemodiafiltration protocol. *Nephrology Dialysis Transplantation* **2005**, *20*, 2537–2542.
118. Sheriff, M.H.R.; Hardman, M.; Lamont, C.A.R.; Shepherd, R.; Warren, D.J. Successful Pregnancy in a 44-Year-Old Haemodialysis Patient *British Journal of Obstetrics and Gynaecology* **1978**, *85*, 386–389, doi:10.1111/j.1471-0528.1978.tb14900.x.
119. Walsh, A. Management of a pregnant woman dependent on haemodialysis. *Journal of Renal Care* **2002**, *28*, 91–94.
120. Levy, D.P.; Giatras, I.; Jungers, P. Pregnancy and end-stage renal disease: past experience and new insights. *Nephrology, dialysis, transplantation* **1998**, *13*, 3005–3007, doi:10.1093/ndt/13.12.3005.
121. Cocîrță, E.; Peltecu, G.; Panaitescu, A.M. Pregnancy in patients on hemodialysis for end stage renal disease. Review of the literature and case report. *Obstetrica si Ginecologie* **2016**, *64*, 177–181.
122. Levy, A.; Fraser, D.; Katz, M.; Mazar, M.; Sheiner, E. Maternal anemia during pregnancy is an independent risk factor for low birthweight and preterm delivery. *European journal of obstetrics & gynecology and reproductive biology* **2005**, *122*, 182–186, doi:10.1016/j.ejogrb.2005.02.015.
123. Guida, B.; Pollio, F.; Nastasi, A.; Trio, R.; Laccetti, R.; Di Lieto, A.; Citarella, F.; Memoli, B. Nutritional intervention in a hemodialysis pregnant woman: a case report. *Clinical nutrition (Edinburgh, Scotland)* **2003**, *22*, 205–207, doi:10.1054/clnu.2002.0600.
124. Bagon, J.A.; Vernaev, H.; De Muijder, X.; Lafontaine, J.J.; Martens, J.; Van Roost, G. Pregnancy and dialysis. *American Journal of Kidney Diseases* **1998**, *31*, 756–765, doi:10.1016/S0272-6386(98)70060-5.
125. McPhatter, L.L.; Drumheller, J.C. Nutritional implications of pregnancy in dialysis: a case study. *Nephrol Nurs J* **2008**, *35*, 207–209.
126. Stover, J. Pregnancy and dialysis. *A clinical guide to nutrition care in kidney disease* **2004**, 121–126.



127. Sandhu, A.; Regmi, A.; Buchwald, D.; Tzamaloukas, A.H. Pregnancy or Uremia? – Case Report and Review of Conception, Pregnancy, and Complications in Peritoneal Dialysis Patients. *Cureus* **2014**, doi:10.7759/cureus.206.
128. Brookhyser, J. The use of parenteral nutrition supplementation in pregnancy complicated by end-stage renal disease. *Journal of the American Dietetic Association* **1989**, *89*, 93–94.
129. Park, J.-C.; Rhee, J.-H.; Kim, J.-I. Two cases of pregnancy in women requiring dialysis (CAPD/HD) for renal failure. *Korean Journal of Obstetrics and Gynecology* **2006**, 1764–1770.
130. Yattara, H.; Samaké, M.; Sy, S.; Diallo, D.; Coulibaly, N.; Djiguiba, K.; Fofana, A.S.; Coulibaly, S.; Toure, A.; Coulibaly, M.; et al. [Pregnancy In Chronic Hemodialysis, Case Study]. *Le Mali medical* **2019**, *34*, 53–58.
131. Abbassi, H.; Salah-Eddine, A.; Jersifi, H.; Samouh, N.; Moutabarrik, A.; Niang, A. Insuffisance rénale chronique et grossesse. *Gynécologie, obstétrique & fertilité* **2001**, *29*, 106–115, doi:10.1016/S1297-9589(00)00063-1.
132. Seed, E.; Gilbertson, E. Dialysis and a plant-based diet to achieve physiologic urea levels for fetal benefit: Normal pregnancy outcome despite chronic kidney disease and hypertension. *Obstetric Medicine* **2022**, doi:10.1177/1753495X221110821.
133. Henderson, N. Nutritional management of pregnancy in a chronic hemodialysis patient with insulin-dependent diabetes mellitus. *Journal of Renal Nutrition* **1996**, *6*, 222–228, doi:10.1016/S1051-2276(96)90070-9.
134. Subcommittee on Nutritional Status and Weight Gain During Pregnancy, Food and Nutrition Board, Institute of Medicine. *Nutrition during pregnancy: Part I, Weight gain: Part II, Nutrient supplements*; National Academy Press: Washington, D.C, 1990.
135. Melendez, R.; Franquero, C.; Gill, P.; Bakke, T. Successful pregnancy with CAPD. *ANNA Journal* **1988**, *15*, 280–312.
136. Gillet D, S.J., Spinozzi NS. A clinical guide to nutrition care in end stage renal disease. *The American Dietetic Association* **1987**.
137. Vidal, M.L.; Ursu, M.; Martinez, A.; Roland, S.S.; Wibmer, E.; Pereira, D.; Subiza, K.; Alonso, W.; Seijds, L.; Piazze, S. Nutritional control of pregnant women on chronic hemodialysis. *Journal of Renal Nutrition* **1998**, *8*, 150–156.
138. Hou, S.; Orlowski, J.; Pahl, M.; Ambrose, S.; Hussey, M.; Wong, D. Pregnancy in Women With End-Stage Renal Disease: Treatment of Anemia and Premature Labor. *American Journal of Kidney Diseases* **1993**, *21*, 16–22, doi:10.1016/S0272-6386(12)80714-1.
139. Brookhyser, J.; Kinzner, C.; Pahre, S. A case study of two successful pregnancies in a patient with end-stage renal disease. *Journal of Renal Nutrition* **1996**, *6*, 26–33, doi:[https://doi.org/10.1016/S1051-2276\(96\)90105-3](https://doi.org/10.1016/S1051-2276(96)90105-3).
140. Amoah, E.; Arab, H. Pregnancy in a Hemodialysis Patient With No Residual Renal Function. *American Journal of Kidney Diseases* **1991**, *17*, 585–587, doi:10.1016/S0272-6386(12)80502-6.
141. Shah, A.; Bailey, E.; Hughes, S. Goodpasture's syndrome, haemodialysis and pregnancy. *British Journal of Hospital Medicine (2005)* **2007**, *68*, 48–49.
142. Dunbeck, D.; Klopstein, K.; Heroux, J.; Brencick, K. Peritoneal dialysis patient completes successful pregnancy. *ANNA Journal* **1992**, *19*, 269, 272.
143. Cattran, D.C.; Benzie, R.J. Pregnancy in a Continuous Ambulatory Peritoneal Dialysis Patient. *Peritoneal Dialysis International* **1983**, *3*, 13–14, doi:10.1177/089686088300300105.
144. Villa, G.; Montagna, G.; Segagni, S. [Pregnancy in chronic dialysis. A case report and a review of the literature]. *G Ital Nefrol* **2007**, *24*, 132–140.
145. Racette, N. Chronic Ambulatory Peritoneal Dialysis (CAPD) in Pregnancy: a Case Report and Review. *Journal SOGC* **1997**, *19*, 1373–1380, doi:10.1016/S0849-5831(16)30943-0.
146. Rolfes, S.R.; DeBruyne, L.K.; Whitney, E.N. *Life Span Nutrition: Conception Through Life*. 1990.
147. Unzelman, R.F.; Alderfer, G.R.; Chojnacki, R.E. Pregnancy and chronic hemodialysis. *Transactions - American Society for Artificial Internal Organs* **1973**, *19*, 144–149.
148. Perry, L.A. A multidisciplinary approach to the management of pregnant patients with end-stage renal disease. *The Journal of perinatal & neonatal nursing* **1994**, *8*, 12–19, doi:10.1097/00005237-199406000-00003.

149. Sivasuthan, G.; Dahwa, R.; John, G.T.; Ranganathan, D. Dialysis and Pregnancy in End Stage Kidney Disease Associated with Lupus Nephritis. *Case Reports in Medicine* **2013**, *2013*, 923581–923587, doi:10.1155/2013/923581.
150. Mercadal, L.; Nizard, J. Prepregnancy counselling and management of pregnancy in haemodialysis patients. *Nephrology Dialysis Transplantation* **2020**, *35*, 219–221, doi:10.1093/ndt/gfz056.
151. Hou, S. Modification of dialysis regimens for pregnancy. *Int J Artif Organs* **2002**, *25*, 823–826, doi:10.1177/039139880202500902.
152. Ellis, P. Back to basics: pregnancy and dialysis. *Journal of renal nursing* **2012**, *4*, 202–203.
153. Bahadi, A.; El Kabbaj, D.; Guelzim, K.; Kouach, J.; Hassani, M.; Maoujoud, O.; Aattif, M.; Kadiri, M.; Montassir, D.; Zajjari, Y. Pregnancy during hemodialysis: a single center experience. *Saudi Journal of Kidney Diseases and Transplantation* **2010**, *21*, 646.
154. Jagielski, J.B. Optimizing nutritional care for pregnant patients on hemodialysis. *J Ren Nutr* **2015**, *25*, e19–21, doi:10.1053/j.jrn.2015.02.003.
155. A Concise, Practical Resource for Comprehensive Nutrition Care in CKD. Pocket Guide to Nutrition Assessment of the Patient with Chronic Kidney Disease: Improving Global Outcomes Diabetes Work Group. *National Kidney Foundation* **2009**.
156. Lawrence, J. Pregnancy and Kidney Disease. CRC Press: Boca Raton, 2012; pp. 163–170.
157. Wiggins, K.L.; Harvey, K.S. A review of guidelines for nutrition care of renal patients. *Journal of Renal Nutrition* **2002**, *12*, 190–196, doi:10.1053/jren.2002.34252.
158. Third Report of the National Cholesterol Education Program (NCEP) Expert Panel on Detection, Evaluation, and Treatment of High Blood Cholesterol in Adults (Adult Treatment Panel III) final report. *Circulation* **2002**, *106*, 3143–3421.
159. Flecha, A. Pharmacologic, Breastfeeding, and Nutritional Considerations During Pregnancy and Postpartum. *Obstetric and Gynecologic Nephrology: Women's Health Issues in the Patient With Kidney Disease* **2020**, 245–266.
160. Pahl, M.V. Pregnancy in Kidney Disease. In *Endocrine Disorders in Kidney Disease: Diagnosis and Treatment*; Springer Nature Switzerland 2019; pp. 139–150.
161. Sandhu, A.S. Peritoneal Dialysis and Pregnancy. In *Some Special Problems in Peritoneal Dialysis*; IntechOpen: 2016.
162. Fisher, E.I.; Deering, S.H.; Oliver, J.D. Dialysis in Pregnancy. John Wiley & Sons, Ltd: Chichester, UK, 2018; pp. 273–283.
163. Stover, J. Pregnancy. In *Nutrition in Kidney Disease*; Humana Press: Totowa, NJ, 2008; pp. 419–428.
164. Stover, J. Pregnancy. In *Nutrition in Kidney Disease*, Byham-Gray, L.D., Burrowes, J.D., Chertow, G.M., Eds.; Humana Press: Totowa, NJ, 2014; pp. 291–298.
165. Hou, S. Pregnancy in Women Treated With Dialysis: Lessons From a Large Series Over 20 Years. *American Journal of Kidney Diseases* **2010**, *56*, 5–6.
166. Dietary reference intake tables. Available online: [https://ods.od.nih.gov/Health\\_Information/Dietary\\_Reference\\_Intakes.aspx](https://ods.od.nih.gov/Health_Information/Dietary_Reference_Intakes.aspx) (accessed on
167. Stover, J.; Trolinger, M. Pregnancy. In *Nutrition in Kidney Disease*; Humana Press: Totowa, NJ, 2020; pp. 347–355.
168. Kominiarek, M.A.; Rajan, P. Nutrition Recommendations in Pregnancy and Lactation. *Med Clin North Am* **2016**, *100*, 1199–1215, doi:10.1016/j.mcna.2016.06.004.
169. Plant, L. Pregnancy and dialysis. In *Renal Disease in Pregnancy*; RCOG Press London: 2008; pp. 61–68.
170. Stover, J. Pregnancy and Chronic Kidney Disease. Humana Press: Totowa, NJ, 2022.
171. Goody, A.J.; Umans, J.G. Pregnancy and dialysis. *Replacement of Renal Function by Dialysis* **2004**, 1249–1257.
172. Vellanki, K.; Hou, S. Chronic Kidney Disease in Pregnancy. In *Obstetric and Gynecologic Nephrology: Women's Health Issues in the Patient with Kidney Disease*; 2019; pp. 165–181.
173. Shahid, K.; Plant, L.; Hladunewich, M. Pregnancy and Dialysis. *Renal Disease in Pregnancy* **2018**, 107.
174. Piccoli, G.B.; Attini, R.; Torreggiani, M.; Orozco-Guillén, A. Pregnancy in Dialysis Patients. In *Handbook of Dialysis Therapy*; Elsevier: 2023; pp. 513–529.
175. Bruno Vecchio, R.C.; Del Negro, V.; Savastano, G.; Porpora, M.G.; Piccioni, M.G. Dialysis on Pregnancy: An Overview. *Women (Basel, Switzerland)* **2021**, *1*, 60–69, doi:10.3390/women1010005.
176. S. Hou, S. Elahi. Pregnancy In Peritoneal Dialysis Patients. *Indian Journal of Peritoneal Dialysis* **2005**, 14–16.
177. Hou, S. Pregnancy in chronic renal insufficiency and end-stage renal disease. *American Journal of Kidney Diseases* **1999**, *33*, 235–252, doi:10.1016/S0272-6386(99)70296-9.



178. Stover, J. 16 Pregnancy. *Nutrition in Kidney Disease* **2008**, 419.
179. Hou, S. Pregnancy in Women on Dialysis: Is Success a Matter of Time? *Clinical Journal of the American Society of Nephrology* **2008**, 3, 312–313, doi:10.2215/cjn.00340108.
180. McKay, D.B.; Josephson, M.A. Pregnancy after Kidney Transplantation. *Clinical journal of the American Society of Nephrology* **2008**, 3, S117-S125, doi:10.2215/CJN.02980707.
181. Stover, J.; Trolinger, M. Pregnancy. *Nutrition in Kidney Disease* **2020**, 347-355.
182. Vidal, M.L.; Ursu, M.; Martinez, A.; Roland, S.S.; Wibmer, E.; Pereira, D.; Subiza, K.; Alonso, W.; Seijas, L.; Piazzze, S.; et al. Nutritional control of pregnant women on chronic hemodialysis. *Journal of Renal Nutrition* **1998**, 8, 150–156.
183. Vitamin D: Screening and Supplementation During Pregnancy. *The American College of Obstetricians and Gynecologists* **2011**.
184. Barua, M.; Hladunewich, M.; Keunen, J.; Pierratos, A.; McFarlane, P.; Sood, M.; Chan, C.T. Successful Pregnancies on Nocturnal Home Hemodialysis. *Clinical Journal of the American Society of Nephrology* **2008**, 3, 392–396, doi:10.2215/cjn.04110907.
185. Dietary Reference Intakes (DRI's): Recommended Intakes for Individuals, Vitamins and Dietary Reference Intakes (DRI's): Recommended Intakes for Individuals, Elements. **2004**.
186. Grossman, S., Hou S., *Handbook of Dialysis*, 3rd ed.; Lippincott Williams & Wilkins: Philadelphia, PA, 2000; pp. 624–636.
187. Hladunewich, M.A.; Hou, S.; Odutayo, A.; Cornelis, T.; Pierratos, A.; Goldstein, M.; Tennankore, K.; Keunen, J.; Dini, H.; Chan, C.T. Intensive Hemodialysis Associates with Improved Pregnancy Outcomes: A Canadian and United States Cohort Comparison. *Journal of the American Society of Nephrology* **2014**, 25, 1103–1109, doi:10.1681/ASN.2013080825.
188. Nadeau-Fredette, A.-C.; Hladunewich, M.; Hui, D.; Keunen, J.; Chan, C.T. End-Stage Renal Disease and Pregnancy. *Advances in Chronic Kidney Disease* **2013**, 20, 246–252, doi:<https://doi.org/10.1053/j.ackd.2013.01.010>.
189. Tonelli, M.; Wiebe, N.; Hemmelgarn, B.; Klarenbach, S.; Field, C.; Manns, B.; Thadhani, R.; Gill, J. Trace elements in hemodialysis patients: a systematic review and meta-analysis. *BMC Med* **2009**, 7, 25, doi:10.1186/1741-7015-7-25.
190. Piccoli, G.B.; Minelli, F.; Versino, E.; Cabiddu, G.; Attini, R.; Vigotti, F.N.; Rolfo, A.; Giuffrida, D.; Colombi, N.; Pani, A.; et al. Pregnancy in dialysis patients in the new millennium: A systematic review and meta-regression analysis correlating dialysis schedules and pregnancy outcomes. *Nephrology Dialysis Transplantation* **2016**, 31, 1915–1934, doi:10.1093/ndt/gfv395.
191. Molloy, A.M.; Kirke, P.N.; Brody, L.C.; Scott, J.M.; Mills, J.L. Effects of folate and vitamin B12 deficiencies during pregnancy on fetal, infant, and child development. *Food Nutr Bull* **2008**, 29, S101–S111. discussion S112-105, doi:10.1177/15648265080292s114.
192. Bastos Maia, S.; Rolland Souza, A.S.; Costa Caminha, M.F.; Lins da Silva, S.; Callou Cruz, R.; Carvalho Dos Santos, C.; Batista Filho, M. Vitamin A and Pregnancy: A Narrative Review. *Nutrients* **2019**, 11, doi:10.3390/nu11030681.
193. Okundaye, I.; Abrinko, P.; Hou, S. Registry of Pregnancy in Dialysis Patients. *Obstetrical & gynecological survey* **1998**, 53, 665–667, doi:10.1097/00006254-199811000-00004.
194. Toma, H.; Tanabe, K.; Tokumoto, T.; Kobayashi, C.; Yagisawa, T. Pregnancy in women receiving renal dialysis or transplantation in Japan: a nationwide survey. *Nephrology, dialysis, transplantation: official publication of the European Dialysis and Transplant Association-European Renal Association* **1999**, 14, 1511–1516.
195. Chang, J.Y.; Jang, H.; Chung, B.H.; Youn, Y.A.; Sung, I.K.; Kim, Y.S.; Yang, C.W. The successful clinical outcomes of pregnant women with advanced chronic kidney disease. *Kidney Res Clin Pract* **2016**, 35, 84–89, doi:10.1016/j.krcp.2015.12.005.
196. Institute of, M.; National Research Council Committee to Reexamine, I.O.M.P.W.G. The National Academies Collection: Reports funded by National Institutes of Health. In *Weight Gain During Pregnancy: Reexamining the Guidelines*, Rasmussen, K.M., Yaktine, A.L., Eds.; National Academies Press (US) Copyright © 2009, National Academy of Sciences.: Washington (DC), 2009.
197. Breymann, C.; Visca, E.; Huch, R.; Huch, A. Efficacy and safety of intravenously administered iron sucrose with and without adjuvant recombinant human erythropoietin for the treatment of resistant iron-deficiency anemia during pregnancy. *Am J Obstet Gynecol* **2001**, 184, 662–667, doi:10.1067/mob.2001.111717.

198. Khalafallah, A.A.; Dennis, A.E.; Ogden, K.; Robertson, I.; Charlton, R.H.; Bellette, J.M.; Shady, J.L.; Blesing, N.; Ball, M. Three-year follow-up of a randomised clinical trial of intravenous versus oral iron for anaemia in pregnancy. *BMJ Open* **2012**, *2*, doi:10.1136/bmjopen-2012-000998.
199. Juul, Sandra E.; Derman, Richard J.; Auerbach, M. Perinatal Iron Deficiency: Implications for Mothers and Infants. *Neonatology* **2019**, *115*, 269–274, doi:10.1159/000495978.
200. Muth, I., Stover J. *Pregnancy and Dialysis: A Discussion and Case Review: A Clinical Guide to Nutrition Care in End Stage Renal Disease*, 2 ed.; American Dietetic Association: Chicago, IL, 1994.
201. Mahan, L., Escott-Stump S. *Krause's Food, Nutrition and Diet Therapy* 9ed.; Saunders: Philadelphia, PA, 1996.
202. Imbasciati, E.; Ponticelli, C. Pregnancy and Renal Disease: Predictors for Fetal and Maternal Outcome. *American Journal of Nephrology* **2008**, *11*, 353–362, doi:10.1159/000168338.
203. Abrams, B. Weight gain and energy intake during pregnancy. *Clin Obstet Gynecol* **1994**, *37*, 515–527, doi:10.1097/00003081-199409000-00005.
204. American Society for Parenteral and Enteral Nutrition: Nutrition Support Dietetics Core Curriculum. *American Society for Parenteral and Enteral Nutrition* **1993**, 125–136.
205. Blackburn, G.L.; Bell, S.J.; Mullen, J.L. *Nutritional medicine : a case management approach*; Saunders Philadelphia: Philadelphia, 1989.
206. Cotton, A. Enteral Nutrition in the Dialysis Patient. *Dietetic Currents* **1995**, *22*.
207. Maurer, G.; Abriola, D. Pregnancy following renal transplant. *The Journal of perinatal & neonatal nursing* **1994**, *8*, 28–36, doi:10.1097/00005237-199406000-00005.
208. Rasmussen, K.M.; Catalano, P.M.; Yaktine, A.L. New guidelines for weight gain during pregnancy: what obstetrician/gynecologists should know. *Current opinion in obstetrics & gynecology* **2009**, *21*, 521–526, doi:10.1097/gco.0b013e328332d24e.
209. Hod, M.; Kapur, A.; Sacks, D.A.; Hadar, E.; Agarwal, M.; Di Renzo, G.C.; Roura, L.C.; McIntyre, H.D.; Morris, J.L.; Divakar, H. The International Federation of Gynecology and Obstetrics (FIGO) Initiative on gestational diabetes mellitus: A pragmatic guide for diagnosis, management, and care. *International Journal of Gynecology and Obstetrics* **2015**, *131*, S173–S211, doi:10.1016/S0020-7292(15)30033-3.
210. Duarte-Gardea, M.O.; Gonzales-Pacheco, D.M.; Reader, D.M.; Thomas, A.M.; Wang, S.R.; Gregory, R.P.; Piemonte, T.A.; Thompson, K.L.; Moloney, L. Academy of Nutrition and Dietetics Gestational Diabetes Evidence-Based Nutrition Practice Guideline. *Journal of the Academy of Nutrition and Dietetics* **2018**, *118*, 1719–1742, doi:10.1016/j.jand.2018.03.014.
211. Chronic Kidney Disease (2010) Evidence-Based Nutrition Practice Guideline. Academy of Nutrition and Dietetics. **2015**.
212. Hou, S. Pregnancy and renal disease. *Educational review manual in nephrology* **2008**, 251–278.
213. Young, B.E.; McNanley, T.J.; Cooper, E.M.; McIntyre, A.W.; Witter, F.; Harris, Z.L.; O'Brien, K.O. Vitamin D insufficiency is prevalent and vitamin D is inversely associated with parathyroid hormone and calcitriol in pregnant adolescents. *J Bone Miner Res* **2012**, *27*, 177–186, doi:10.1002/jbmr.526.
214. Achebe, M.M.; Gafer-Gvili, A. How I treat anemia in pregnancy: iron, cobalamin, and folate. *Blood* **2017**, *129*, 940–949, doi:<https://doi.org/10.1182/blood-2016-08-672246>.
215. US Food and Drug Administration. Renvela (sevelamer carbonate) label. . Available online: [https://www.accessdata.fda.gov/drugsatfda\\_docs/label/2014/022127s0111bl.pdf](https://www.accessdata.fda.gov/drugsatfda_docs/label/2014/022127s0111bl.pdf) (accessed on 2020-03-14).
216. Horjus, C.; Groot, I.; Telting, D.; van Setten, P.; van Sorge, A.; Kovacs, C.S.; Hermus, A.; de Boer, H. Cinacalcet for hyperparathyroidism in pregnancy and puerperium. *J Pediatr Endocrinol Metab* **2009**, *22*, 741–749, doi:10.1515/jpem.2009.22.8.741.
217. Hussar, D.A. New drugs 05, part I. *Nursing* **2005**, *35*, 54–61; quiz 61–53, doi:10.1097/00152193-200502000-00041.
218. Podymow, T.; August, P.; Akbari, A. Management of renal disease in pregnancy. *Obstet Gynecol Clin North Am* **2010**, *37*, 195–210, doi:10.1016/j.ogc.2010.02.012.
219. Luders, C.; Titan, S.M.; Kahhale, S.; Francisco, R.P.; Zugaib, M. Risk Factors for Adverse Fetal Outcome in Hemodialysis Pregnant Women. *Kidney Int Rep* **2018**, *3*, 1077–1088, doi:10.1016/j.ekir.2018.04.013.
220. Schoenaker, D.A.; Soedamah-Muthu, S.S.; Mishra, G.D. The association between dietary factors and gestational hypertension and pre-eclampsia: a systematic review and meta-analysis of observational studies. *BMC Med* **2014**, *12*, 157, doi:10.1186/s12916-014-0157-7.

221. Hussey, M.J.; Pombar, X. Obstetric care for renal allograft recipients or for women treated with hemodialysis or peritoneal dialysis during pregnancy. *Advances in Renal Replacement Therapy* **1998**, *5*, 3–13, doi:10.1016/S1073-4449(98)70009-3.
222. Chertow, G.M.; Ling, J.; Lew, N.L.; Lazarus, J.M.; Lowrie, E.G. The association of intradialytic parenteral nutrition administration with survival in hemodialysis patients. *Am J Kidney Dis* **1994**, *24*, 912–920, doi:10.1016/s0272-6386(12)81060-2.
223. Smolle, K.H.; Kaufmann, P.; Holzer, H.; Druml, W. Intradialytic parenteral nutrition in malnourished patients on chronic haemodialysis therapy. *Nephrol Dial Transplant* **1995**, *10*, 1411–1416.
224. Ikizler, T.A.; Wingard, R.L.; Hakim, R.M. Interventions to treat malnutrition in dialysis patients: the role of the dose of dialysis, intradialytic parenteral nutrition, and growth hormone. *Am J Kidney Dis* **1995**, *26*, 256–265, doi:10.1016/0272-6386(95)90181-7.
225. Descombes, E.; Hanck, A.B.; Fellay, G. Water soluble vitamins in chronic hemodialysis patients and need for supplementation. *Kidney Int* **1993**, *43*, 1319–1328, doi:10.1038/ki.1993.185.
226. Ikizler, T.A.; Cano, N.J.; Franch, H.; Fouque, D.; Himmelfarb, J.; Kalantar-Zadeh, K.; Kuhlmann, M.K.; Stenvinkel, P.; TerWee, P.; Teta, D.; et al. Prevention and treatment of protein energy wasting in chronic kidney disease patients: a consensus statement by the International Society of Renal Nutrition and Metabolism. *Kidney Int* **2013**, *84*, 1096–1107, doi:10.1038/ki.2013.147.
227. Regitz-Zagrosek, V.; Blomstrom Lundqvist, C.; Borghi, C.; Cifkova, R.; Ferreira, R.; Foidart, J.M.; Gibbs, J.S.; Gohlke-Baerwolf, C.; Gorenek, B.; Iung, B.; et al. ESC Guidelines on the management of cardiovascular diseases during pregnancy: the Task Force on the Management of Cardiovascular Diseases during Pregnancy of the European Society of Cardiology (ESC). *Eur Heart J* **2011**, *32*, 3147–3197, doi:10.1093/eurheartj/ehr218.
228. Suitor, C.W. Perspectives on nutrition during pregnancy: Part I, Weight gain; Part II, Nutrient supplements. *J Am Diet Assoc* **1991**, *91*, 96–98.
229. Makoff, R. Water-Soluble Vitamin Status in Patients With Renal Disease Treated With Hemodialysis or Peritoneal Dialysis. *Journal of Renal Nutrition* **1991**, *1*, 56–73, doi:[https://doi.org/10.1016/S1051-2276\(12\)80195-6](https://doi.org/10.1016/S1051-2276(12)80195-6).
230. *Clinical practice guidelines for the management of pregnancy in kidney disease patients. Japanese Society of Nephrology*; 2017.
231. Kaiser, L.; Allen, L.H. Position of the American Dietetic Association: Nutrition and Lifestyle for a Healthy Pregnancy Outcome. *Journal of the American Dietetic Association* **2008**, *108*, 553–561, doi:10.1016/j.jada.2008.01.030.
232. Smith, W.T.; Darbari, S.; Kwan, M.; O' Reilly-Green, C.; Devita, M.V. Pregnancy in Peritoneal Dialysis: A Case Report and Review of Adequacy and Outcomes. *International Urology and Nephrology* **2005**, *37*, 145–151, doi:10.1007/s11255-004-2312-0.
233. Macdougall, I.C. Optimal Iron Management in Patients Receiving Erythropoietin Therapy. *Seminars in dialysis* **1998**, *11*, 10–13, doi:10.1111/j.1525-139X.1998.tb00199.x.
234. P. Confortini et al., Full term pregnancy and successful delivery in a patient on chronic hemodialysis. *Proceedings of the European Dialysis and Transplant Association* **1971**, 74–80.
235. Tu, J. Nutrition and fasting in Vietnamese culture. Available online: [http://ethnomed.org/cultures/vietnamese/viet\\_food.html](http://ethnomed.org/cultures/vietnamese/viet_food.html) (accessed on
236. Okundaye, I.; Hou, S. Management of pregnancy in women undergoing continuous ambulatory peritoneal dialysis. *Adv Perit Dial* **1996**, *12*, 151–155.
237. Luders, C.; Martins Castro, M.C.; Titan, S.M.; De Castro, I.; Elias, R.M.; Abensur, H.; Romão, J.E., Jr. Obstetric Outcome in Pregnant Women on Long-term Dialysis: A Case Series. *American Journal of Kidney Diseases* **2010**, *56*, 77–85, doi:10.1053/j.ajkd.2010.01.018.
238. Hou, S. Conception and pregnancy in peritoneal dialysis patients. *Perit Dial Int* **2001**, *21 Suppl 3*, S290–294.
239. Keller, F.; Griesshammer, M.; Häussler, U.; Paulus, W.; Schwarz, A. Pregnancy and renal failure: the case for application of dosage guidelines. *Drugs* **2001**, *61*, 1901–1920.
240. Moranne, O.; Samouelian, V.; Lapeyre, F.; Pagniez, D.; Subtil, D.; Dequiedt, P.; Boulanger, E. [Pregnancy and hemodialysis]. *Nephrologie* **2004**, *25*, 287–292.
241. Hou, S. Pregnancy in women with chronic renal disease. *N Engl J Med* **1985**, *312*, 836–839, doi:10.1056/nejm198503283121306.
242. M. Katz et al., Severe polycystic kidney disease in pregnancy: Report of fetal survival. *Obstet. Gynecol.* **1979**, *53*, 119–124.

243. Kioko, E.M.; Shaw, K.M.; Clarke, A.D.; Warren, D.J. Successful pregnancy in a diabetic patient treated with continuous ambulatory peritoneal dialysis. *Diabetes Care* **1983**, *6*, 298–300, doi:10.2337/diacare.6.3.298.
244. Schiro, K. Pregnancy and hemodialysis: Nutrition considerations. **1987**, *11*, 3–11.
245. Bakke, T. Nutrition considerations in renal disease: Pregnant patient on dialysis. *Dialysis and Transplantation* **1989**, *18*, 4.
246. SR. Rolfes et al., Life span nutrition: Conception through life. **1998**.
247. Pitkin, R. Calcium and the parathyroid gland. In *Medical Complications During Pregnancy*, Burrow, G., & Ferris T, Ed.; W.B. Saunders Company: Philadelphia, 1988; pp. 271–276.
248. Allen, L.H. Anemia and iron deficiency: effects on pregnancy outcome. *Am J Clin Nutr* **2000**, *71*, 1280s–1284s, doi:10.1093/ajcn/71.5.1280s.
249. Williams, D.; Davison, J. Chronic kidney disease in pregnancy. *Bmj* **2008**, *336*, 211–215, doi:10.1136/bmj.39406.652986.BE.
250. Erick, M. Nutrition during pregnancy and lactation. In *Mahan, L.K., and Escott-Stump, S. eds. Krause's Food and Nutrition Therapy* **2008**, 187.
251. Brookhyser, J. The use of parenteral nutrition supplementation in pregnancy complicated by end-stage renal disease. *Journal of the American Dietetic Association* **1989**, *89*, 93–95.
252. Korzets, A.; Azoulay, O.; Ori, Y.; Zevin, D.; Boaz, M.; Herman, M.; Chagnac, A.; Gafter, U. The use of intradialytic parenteral nutrition in acutely ill haemodialysed patients. *J Ren Care* **2008**, *34*, 14–18, doi:10.1111/j.1755-6686.2008.00005.x.
253. Hladunewich, M.; Hercz, A.E.; Keunen, J.; Chan, C.; Pierratos, A. Pregnancy in End Stage Renal Disease: Pregnancy in ESRD. *Seminars in dialysis* **2011**, *24*, 634–639, doi:10.1111/j.1525-139X.2011.00996.x.
254. Hou, S.H. Pregnancy in women on haemodialysis and peritoneal dialysis. *Baillière's Clinical Obstetrics and Gynaecology* **1994**, *8*, 481–500, doi:10.1016/S0950-3552(05)80332-3.
255. S. Hou, S. Grossman. Obstetrics and gynecology in dialysis patients. *Handbook of dialysis* **2015**.
256. Drugs.com. Available online: <https://www.drugs.com/> (accessed on
257. Hou, S. Pregnancy in women treated with dialysis: lessons from a large series over 20 years. *Am J Kidney Dis* **2010**, *56*, 5–6, doi:10.1053/j.ajkd.2010.05.002.
258. Frederiksen, M.C. Physiologic changes in pregnancy and their effect on drug disposition. *Semin Perinatol* **2001**, *25*, 120–123, doi:10.1053/sper.2001.24565.
259. Hollis, B.W.; Wagner, C.L. Nutritional vitamin D status during pregnancy: reasons for concern. *Cmaj* **2006**, *174*, 1287–1290, doi:10.1503/cmaj.060149.
260. Schroth, R.J.; Lavelle, C.L.; Moffatt, M.E. Review of vitamin D deficiency during pregnancy: who is affected? *Int J Circumpolar Health* **2005**, *64*, 112–120, doi:10.3402/ijch.v64i2.17964.
261. Lindheimer, M., & Katz AI. Renal physiology and disease in pregnancy. In *The Kidney: Physiology and Pathophysiology*, 3 ed.; Seldin, D., & Giebisch G, Ed.; Lippincott, Williams & Wilkins: New York, 2000; pp. 2597–2644.
262. Reddy, G.S.; Norman, A.W.; Willis, D.M.; Goltzman, D.; Guyda, H.; Solomon, S.; Philips, D.R.; Bishop, J.E.; Mayer, E. Regulation of vitamin D metabolism in normal human pregnancy. *J Clin Endocrinol Metab* **1983**, *56*, 363–370, doi:10.1210/jcem-56-2-363.
263. Cole, D.E.; Hussain, S.A.; Piering, W.E.; Savin, V.J. Phosphate enriched hemodialysis during pregnancy A case report. *Journal of the American Society of Nephrology* **2001**, *12*, 263A–263A.

Supplementary Figure S1: PRISMA flow diagram of study selection

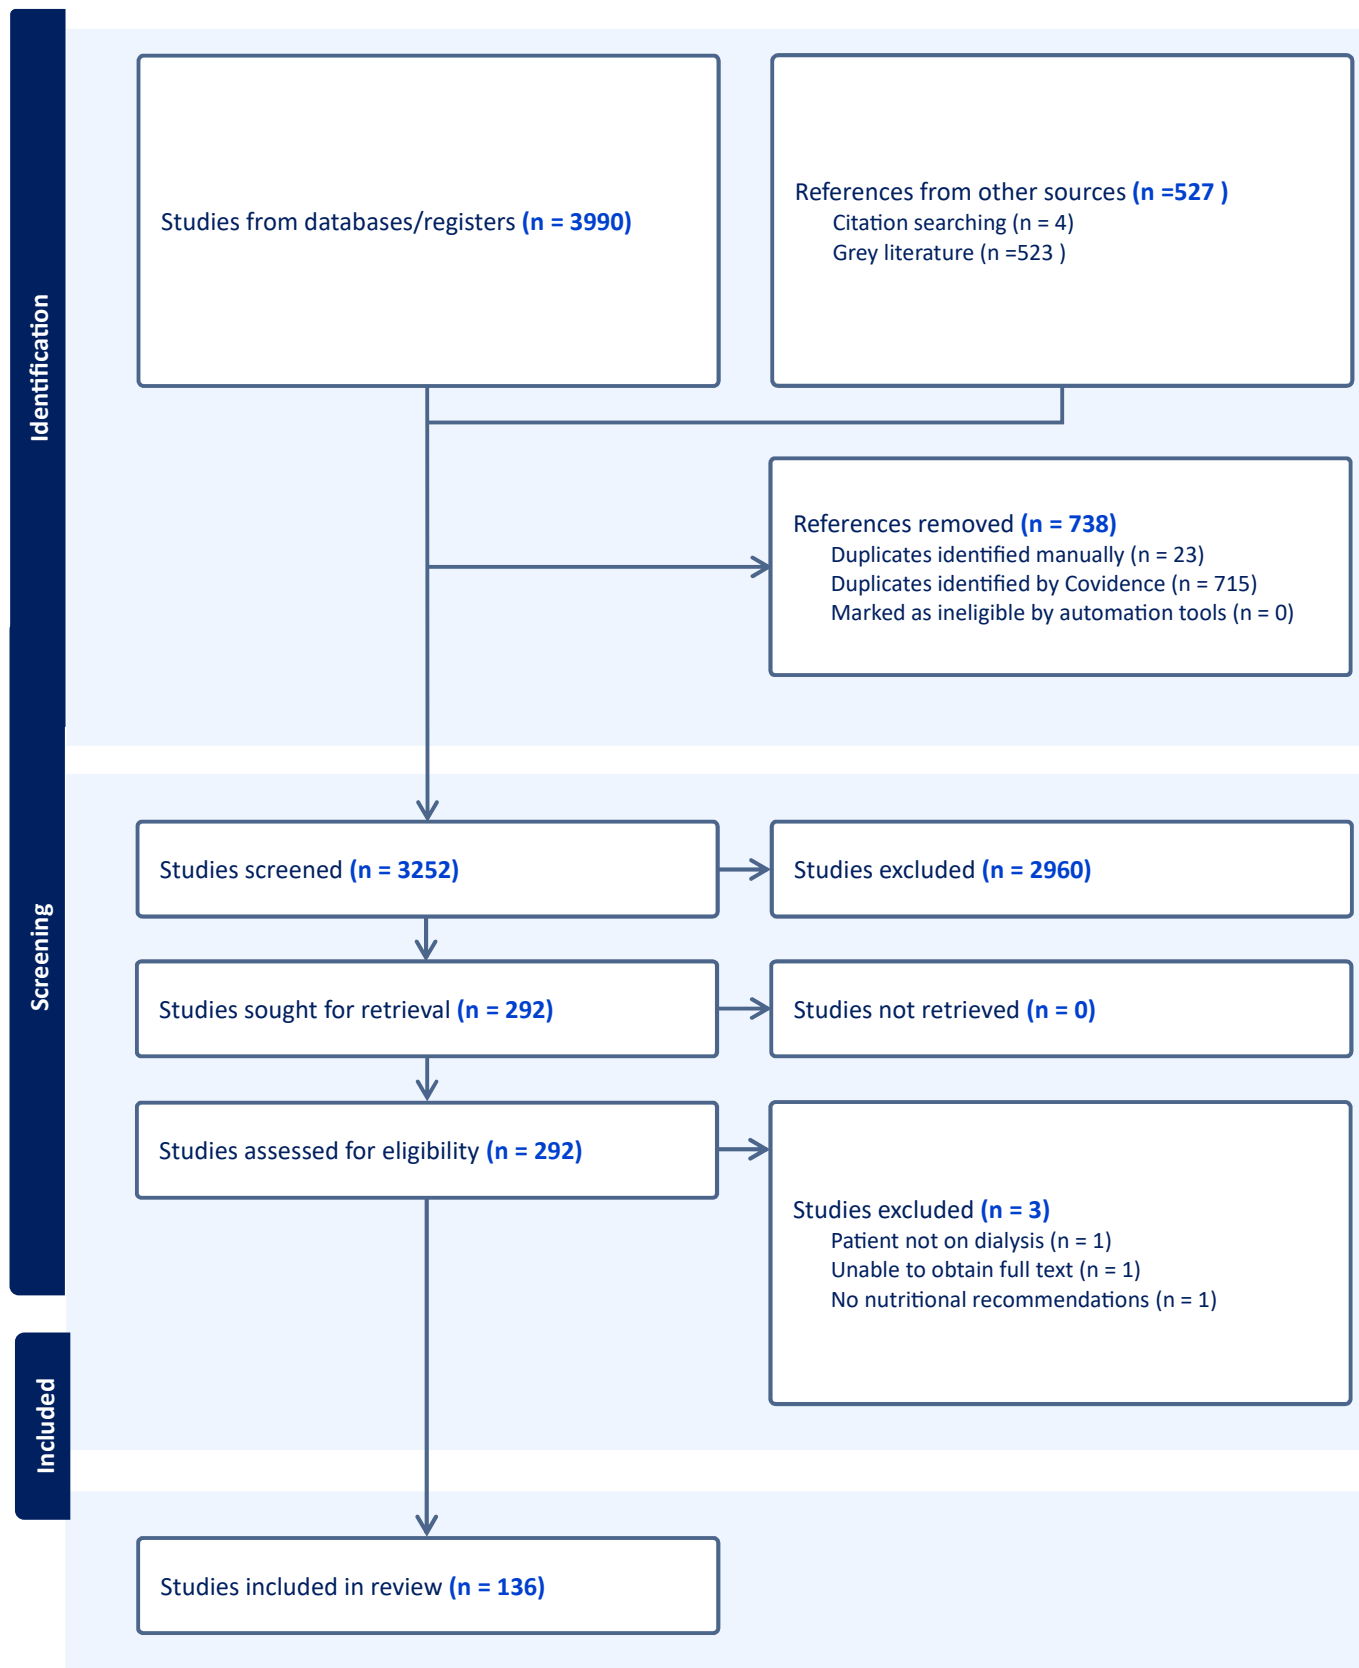

Supplement: s1 [file s1]
